# Supplementary material for: Visible Light-Mediated Organoboron-Catalyzed Metal-Free Synthesis of Silanols from Silanes
Source: MDPI journal article supplement (doi:10.3390/molecules28104082), 2023-05-13

# Supplementary Materials

## Visible Light-Mediated Organoboron-Catalyzed Metal-Free Synthesis of Silanols from Silanes

Jinbo Yang <sup>1</sup>, Xiangxue Cao <sup>1</sup>, Lanfeng Wei <sup>1</sup>, Jianshu Zhang <sup>1</sup>, Jinli Zhang <sup>2</sup>, Ping Liu <sup>1</sup>,  
Liang Xu <sup>1,\*</sup> and Pengfei Li <sup>3,\*</sup>

<sup>1</sup> State Key Laboratory Incubation Base for Green Processing of Chemical Engineering, School of Chemistry and Chemical Engineering, Shihezi University, Beisi Road, Xinjiang Uygur Autonomous region, Shihezi 832003, China; yangjinbo@stu.shzu.edu.cn (J.Y.); caoxiangxue@stu.shzu.edu.cn (X.C.); weilanfeng@stu.shzu.edu.cn (L.W.); zhangjs@shzu.edu.cn (J.Z.); liuping1979112@aliyun.com (P.L.)

<sup>2</sup> School of Chemical Engineering and Technology, Tianjin University, Tianjin 300072, China; zhangjinli@tju.edu.cn

<sup>3</sup> State Key Laboratory for Mechanical Behavior of Materials, Frontier Institute of Science and Technology, Xi'an Jiaotong University, Xi'an 710054, China

\* Correspondence: xuliang4423@shzu.edu.cn (L.X.); lipengfei@xjtu.edu.cn (P.L.)

## **Contents**

|                                               |   |
|-----------------------------------------------|---|
| 1. $^{18}\text{O}$ Labelling experiments..... | 3 |
| 2. Copies of NMR spectra.....                 | 4 |

## 1. $^{18}\text{O}$ Labelling experiments

flame-dried 25 mL quartz reaction tube was placed with a magnetic stir bar. Then, silane 1 (0.2 mmol, 1.0 equiv) were added to the flame-dried 25 mL quartz reaction tube, A triple oxygen replacement process was then performed using a double row of tubes.. After that, A mixture of AQDAB (0.9 mg, 0.002 mmol, 1.0 mol%), Dry DMSO (1 ml) and  $\text{H}_2^{18}\text{O}$  (50  $\mu\text{L}$ ) was rapidly added into the flame-dried 25 mL quartz reaction tube. The reaction tube was placed on a 25w blue Kessil reactor. Then the reaction mixture was stirred at 400-500 RPM and exposed to a blue case lamp at room temperature for 36 hours. After taking out the reaction tube, transfer the reaction mixture to the separator funnel and add 10 ml water to the separator funnel. Then, the reaction mixture was extracted with ethyl acetate ( $3 \times 10 \text{ mL}$ ). The combined organic phase was washed with brine ( $2 \times 5.0 \text{ mL}$ ) and then dried over anhydrous  $\text{Na}_2\text{SO}_4$ . After concentration, the silanol crude product was purified by column chromatography (silica gel) to give silanol 2, using petroleum ether/ethyl acetate (20 : 1) as the eluent.

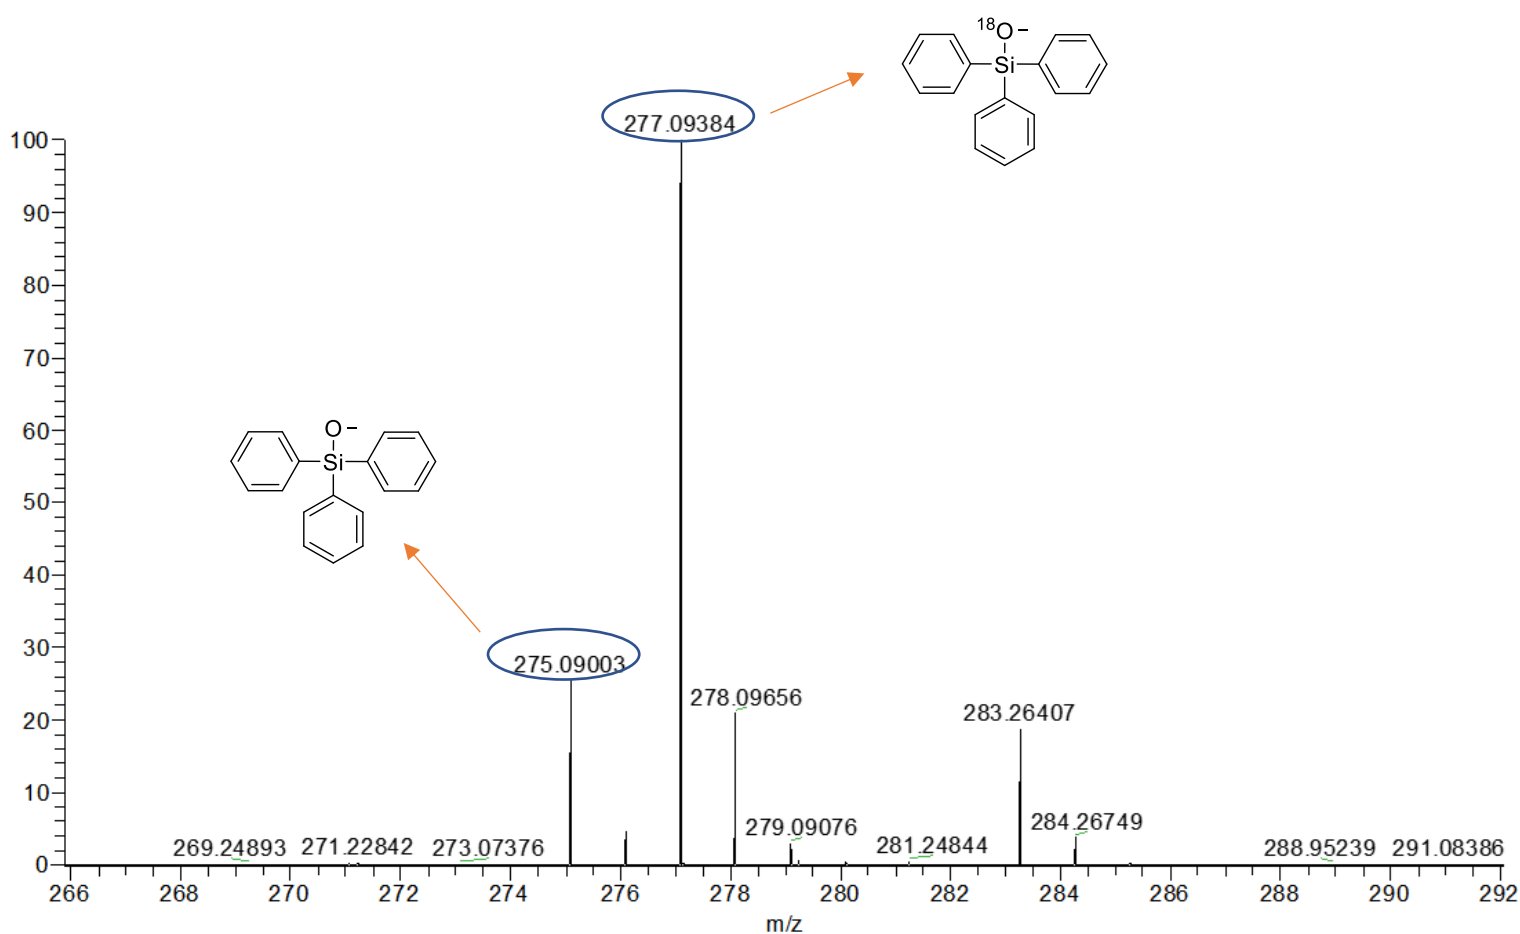

## 2. Copies of NMR spectra

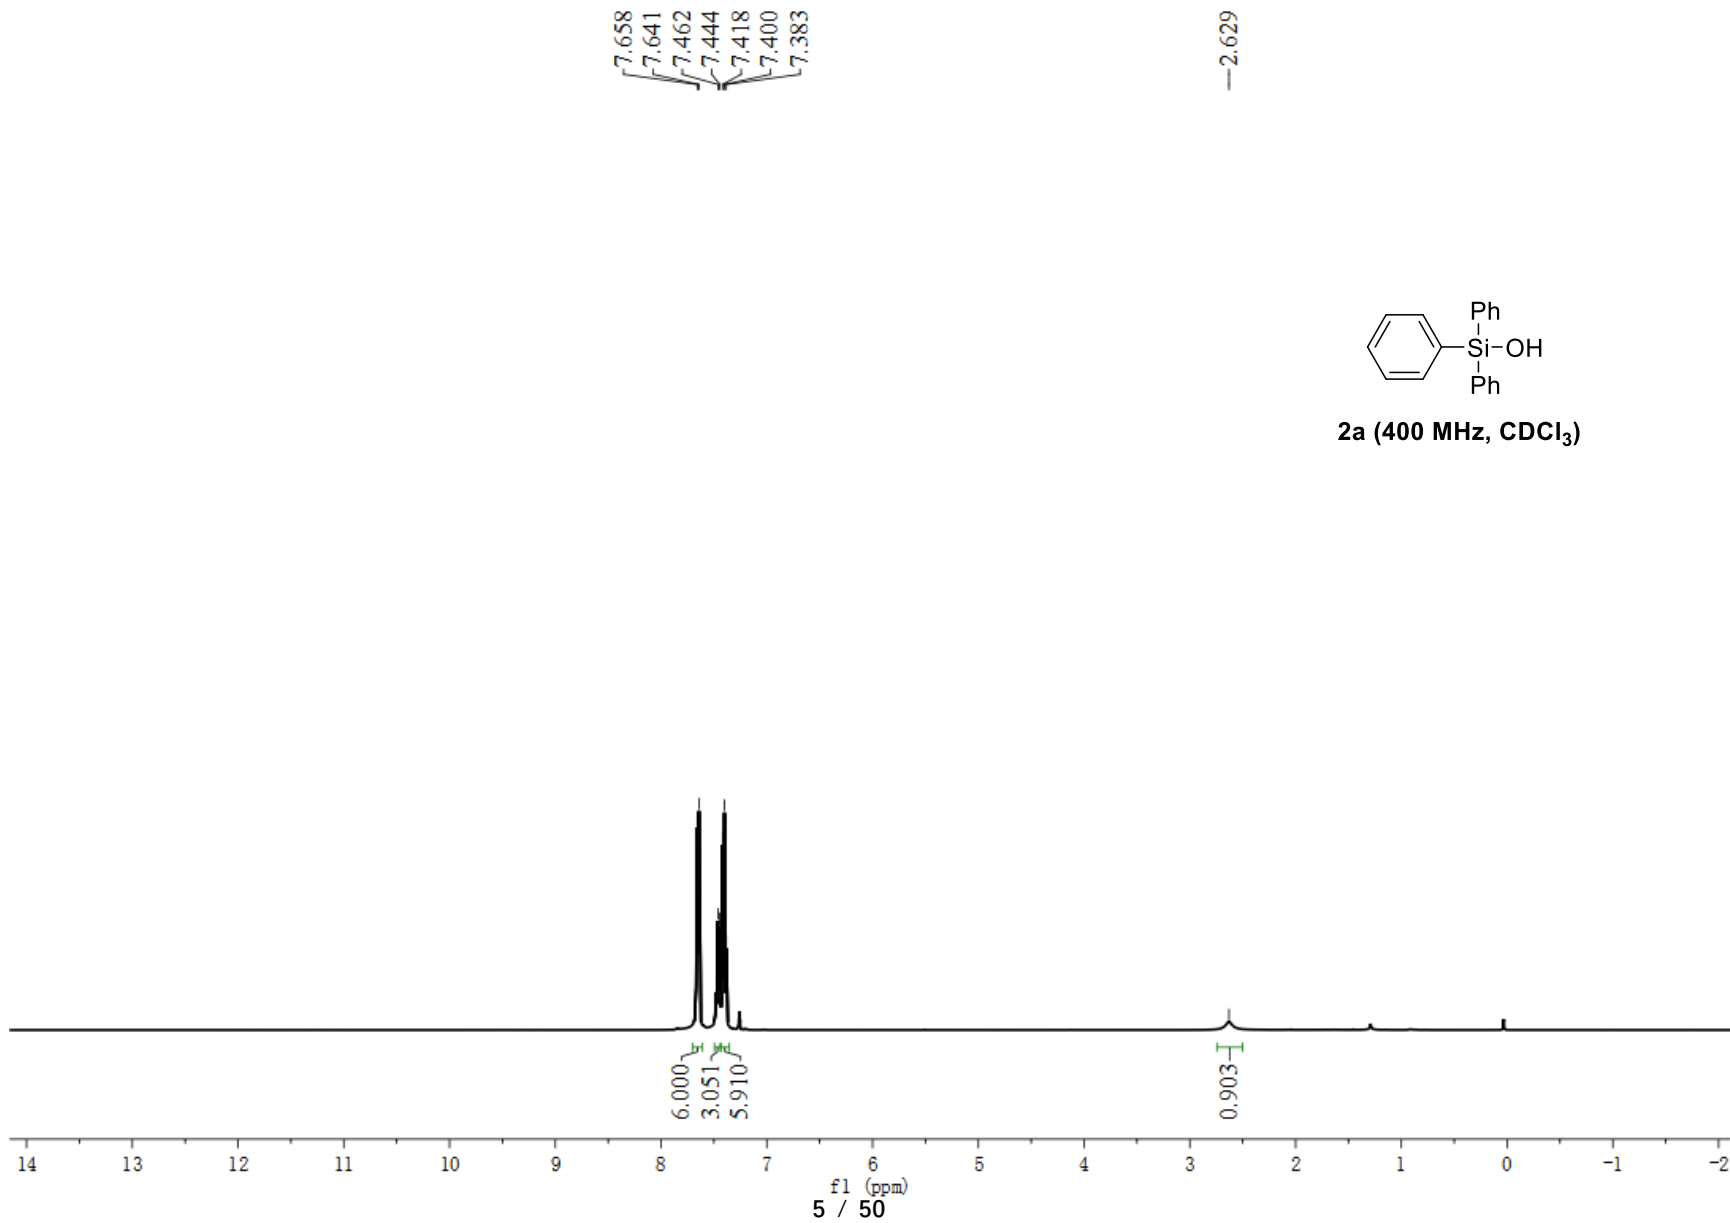

135.10  
134.97  
130.10  
127.91

77.32  
77.00  
76.68

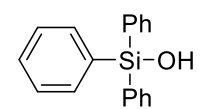

**2a** (101 MHz, CDCl<sub>3</sub>)

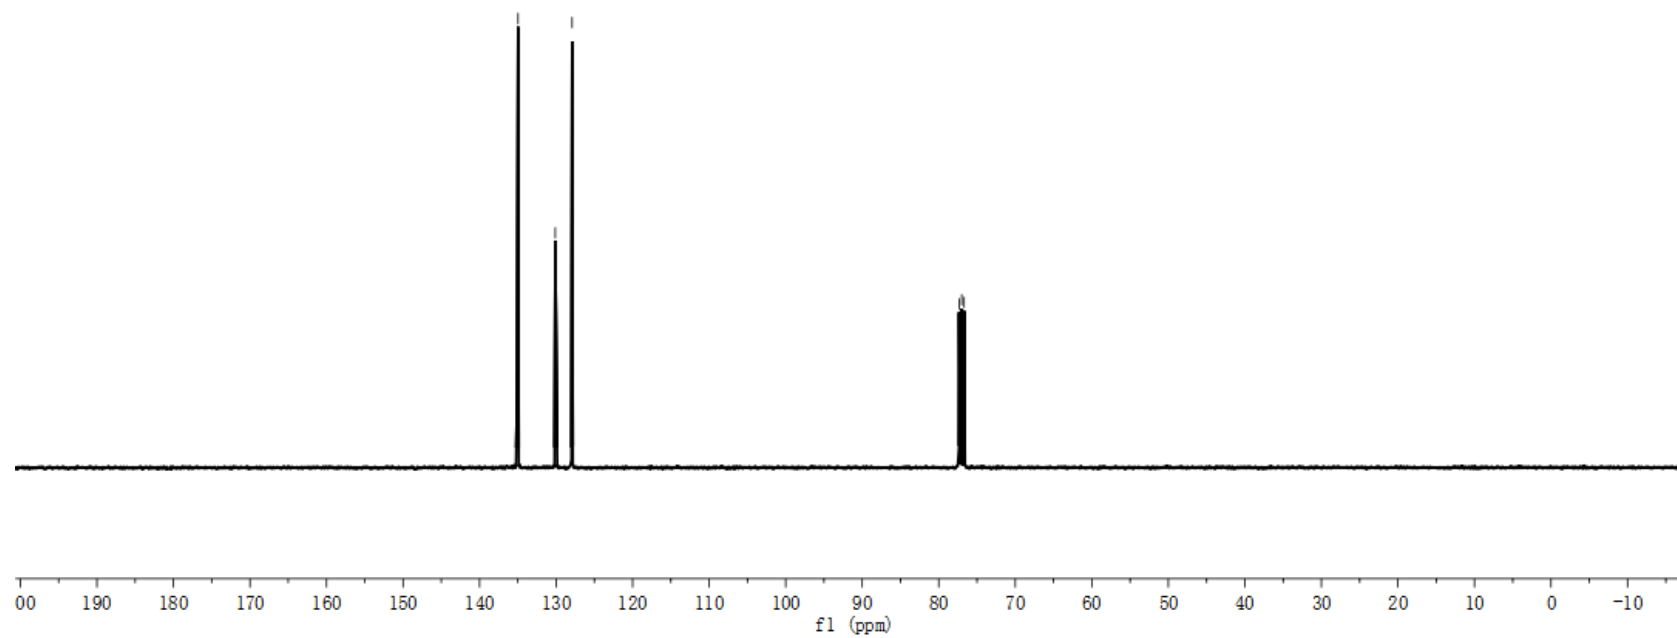

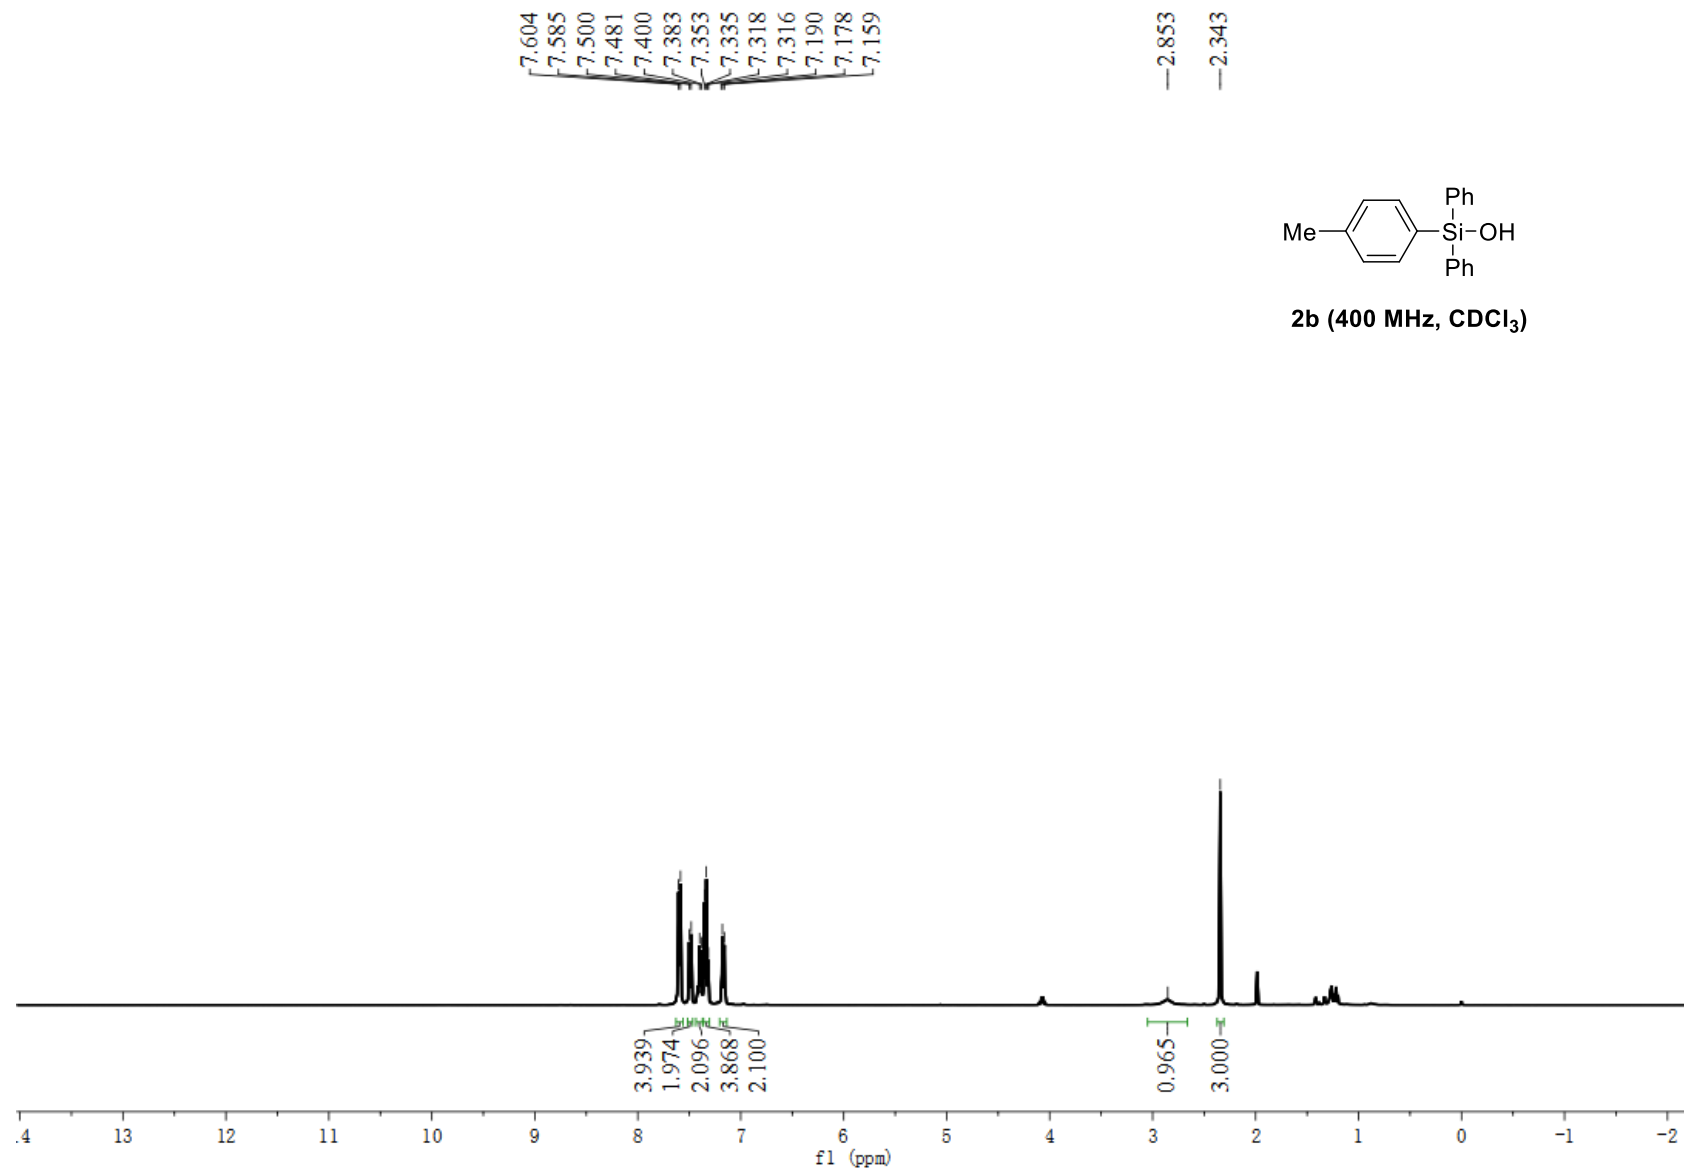

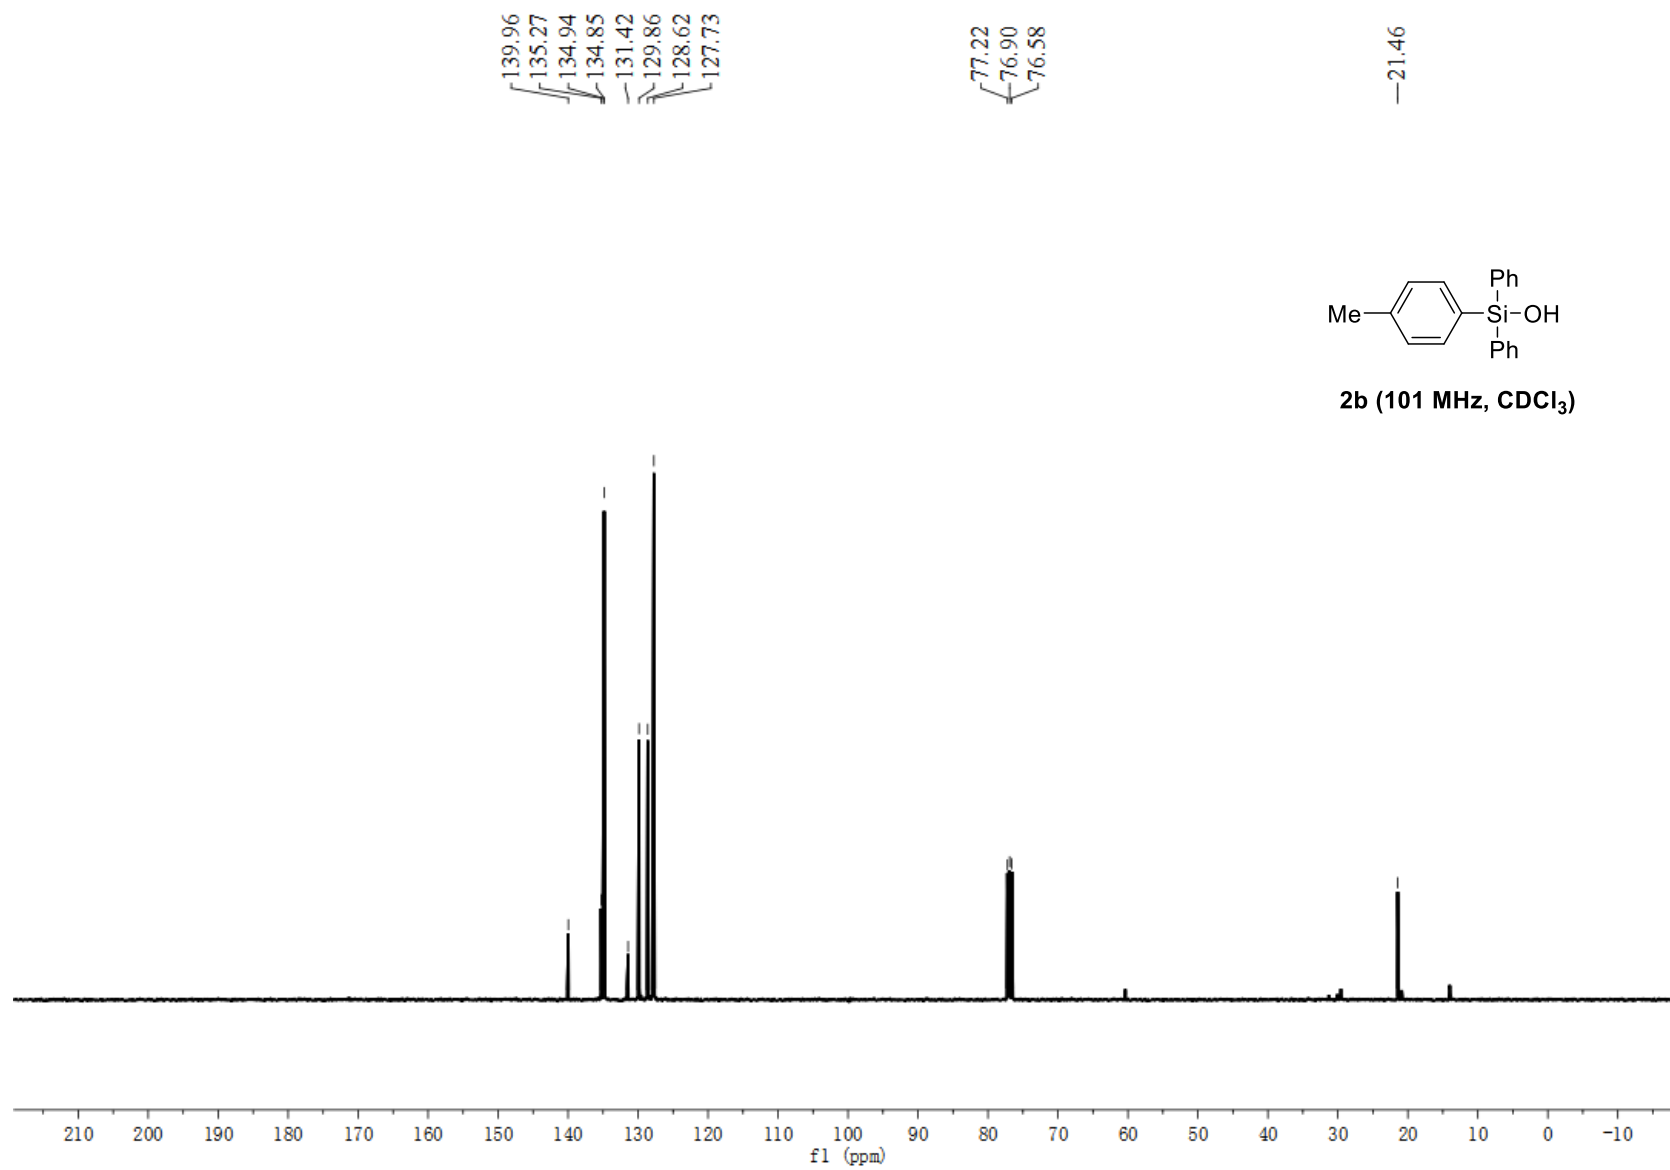



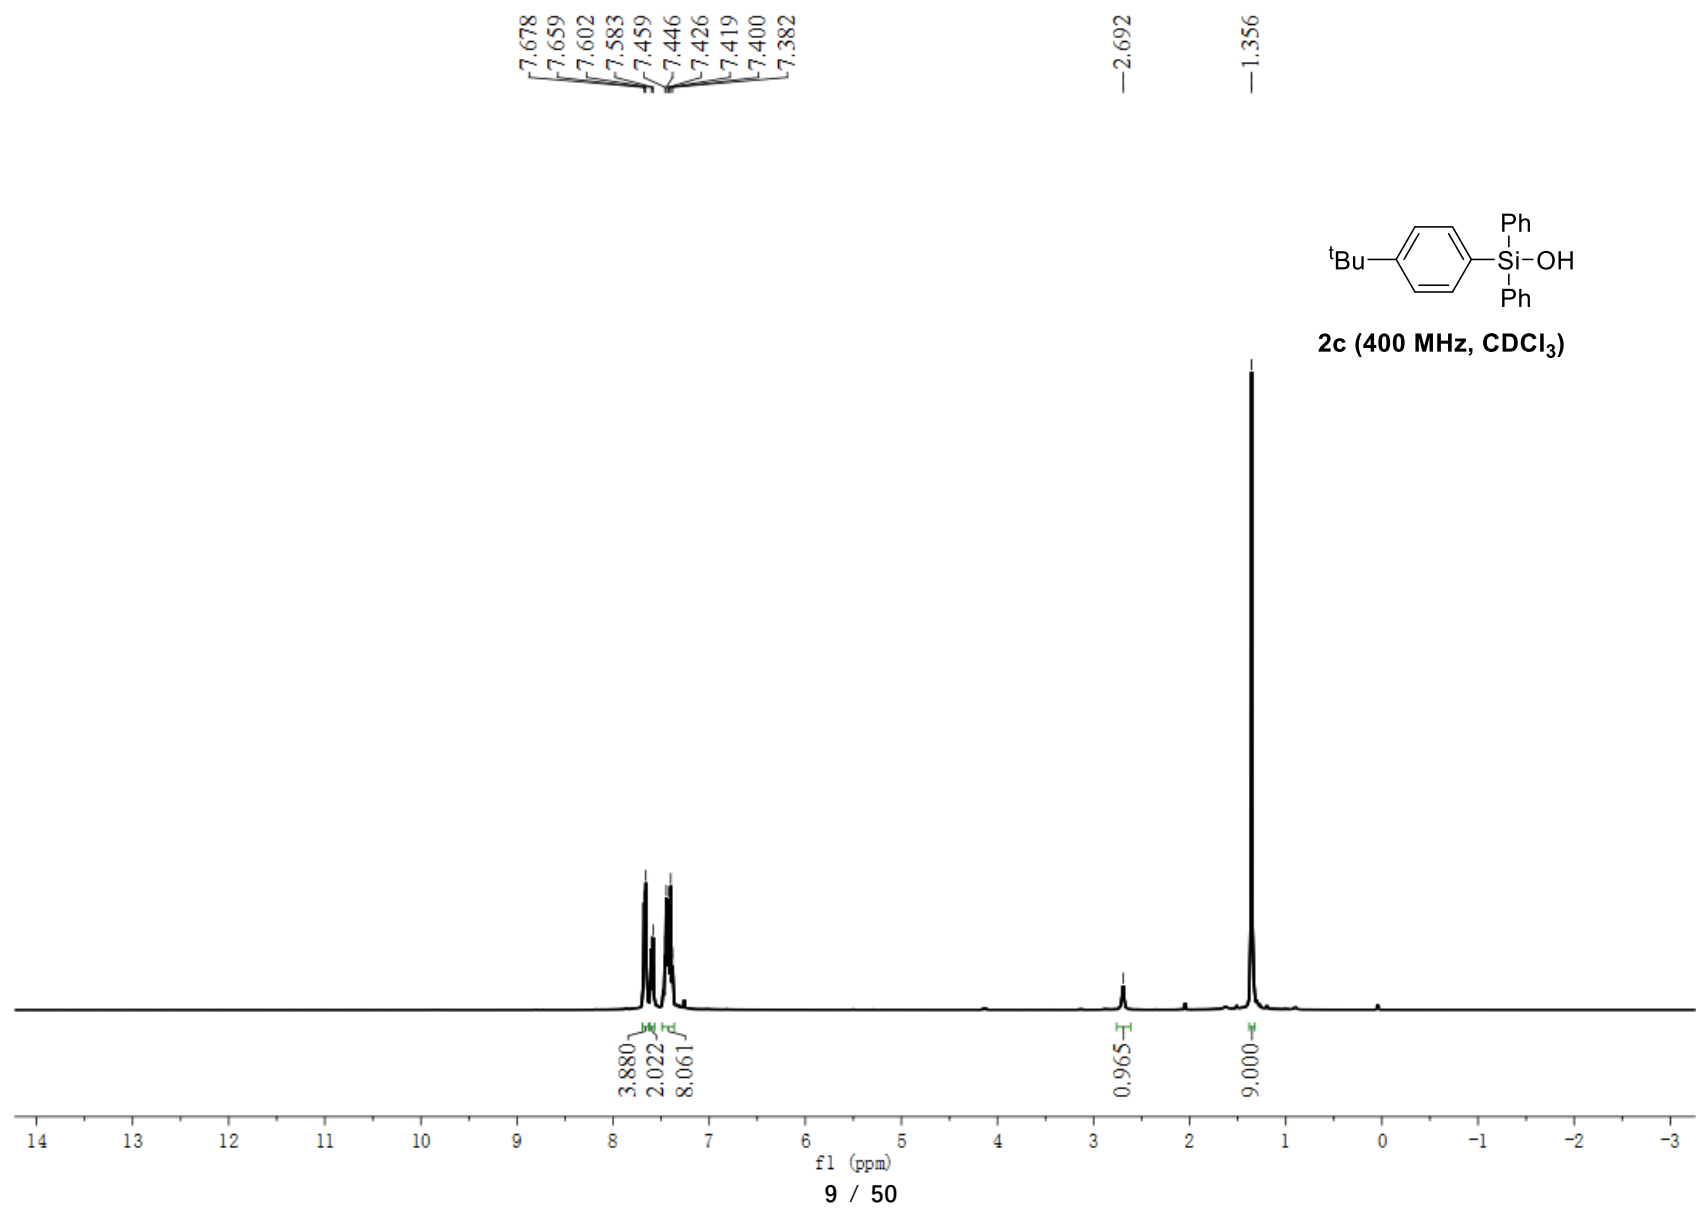

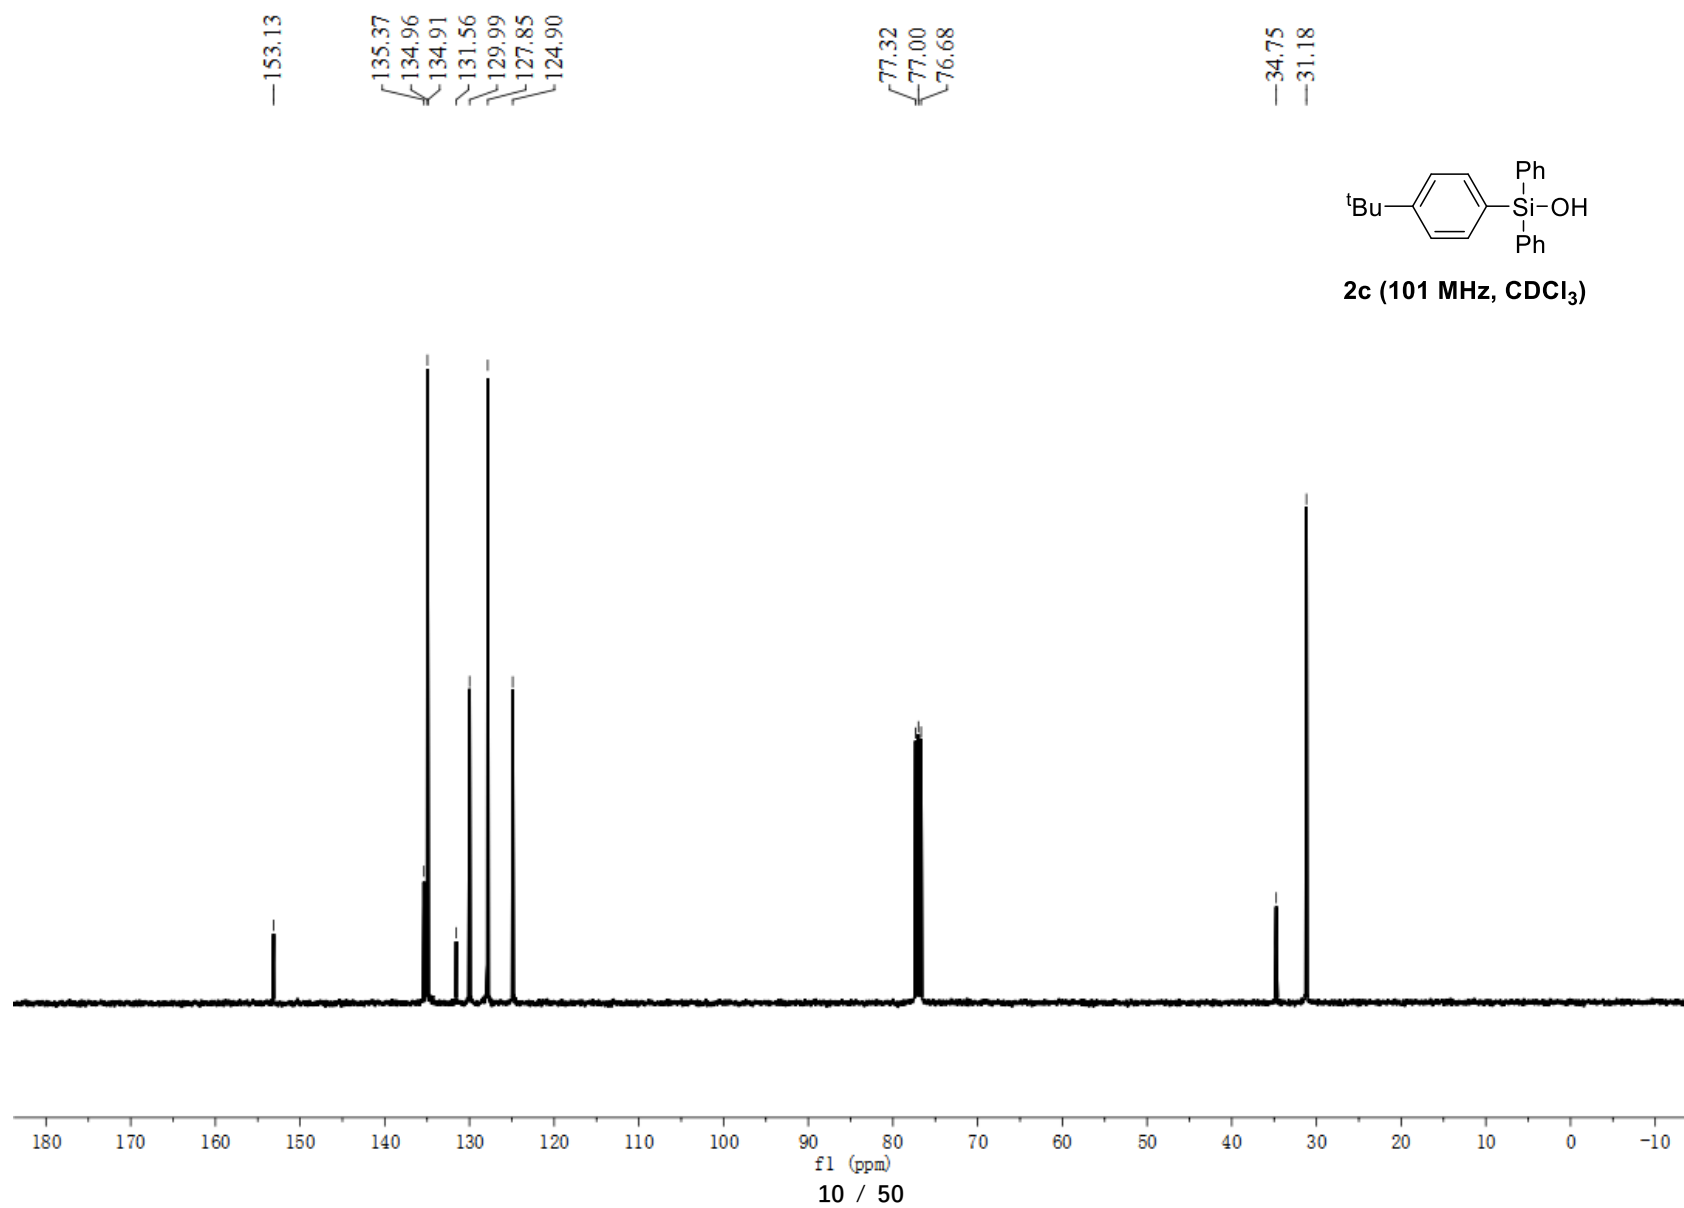

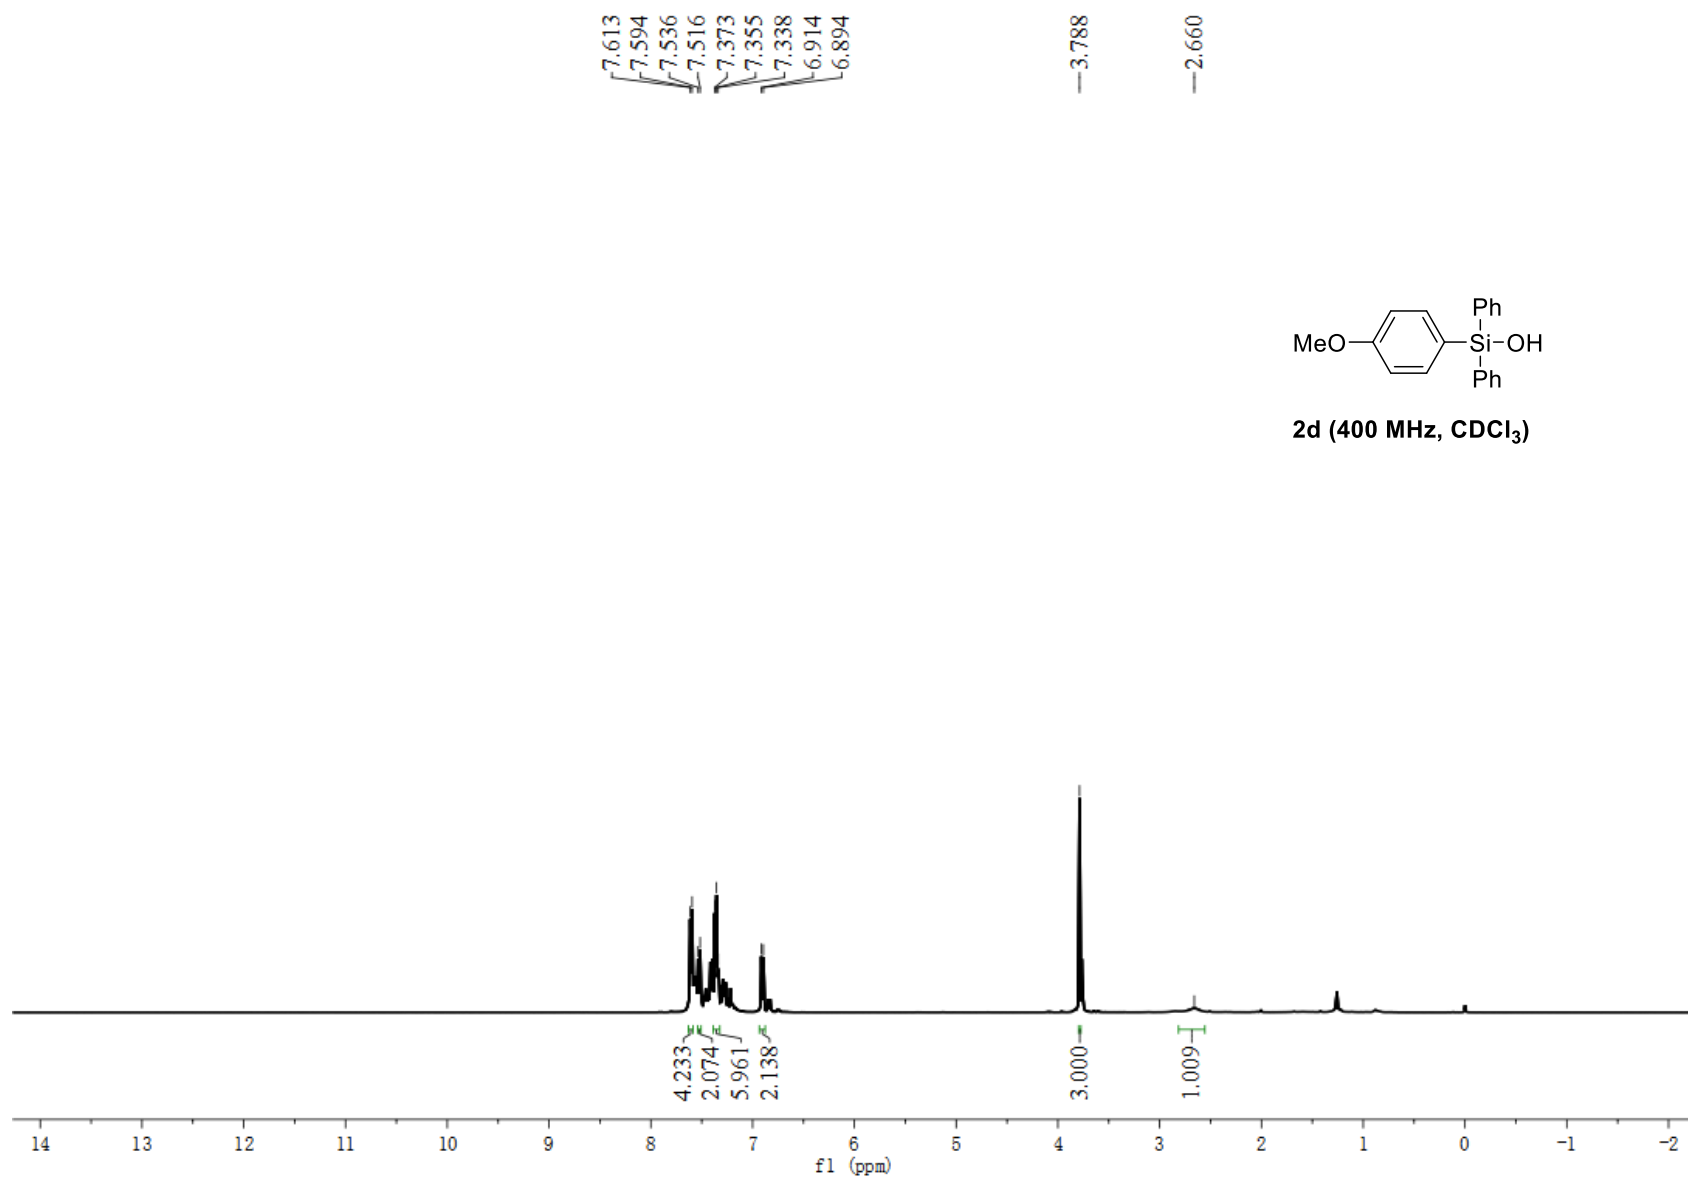

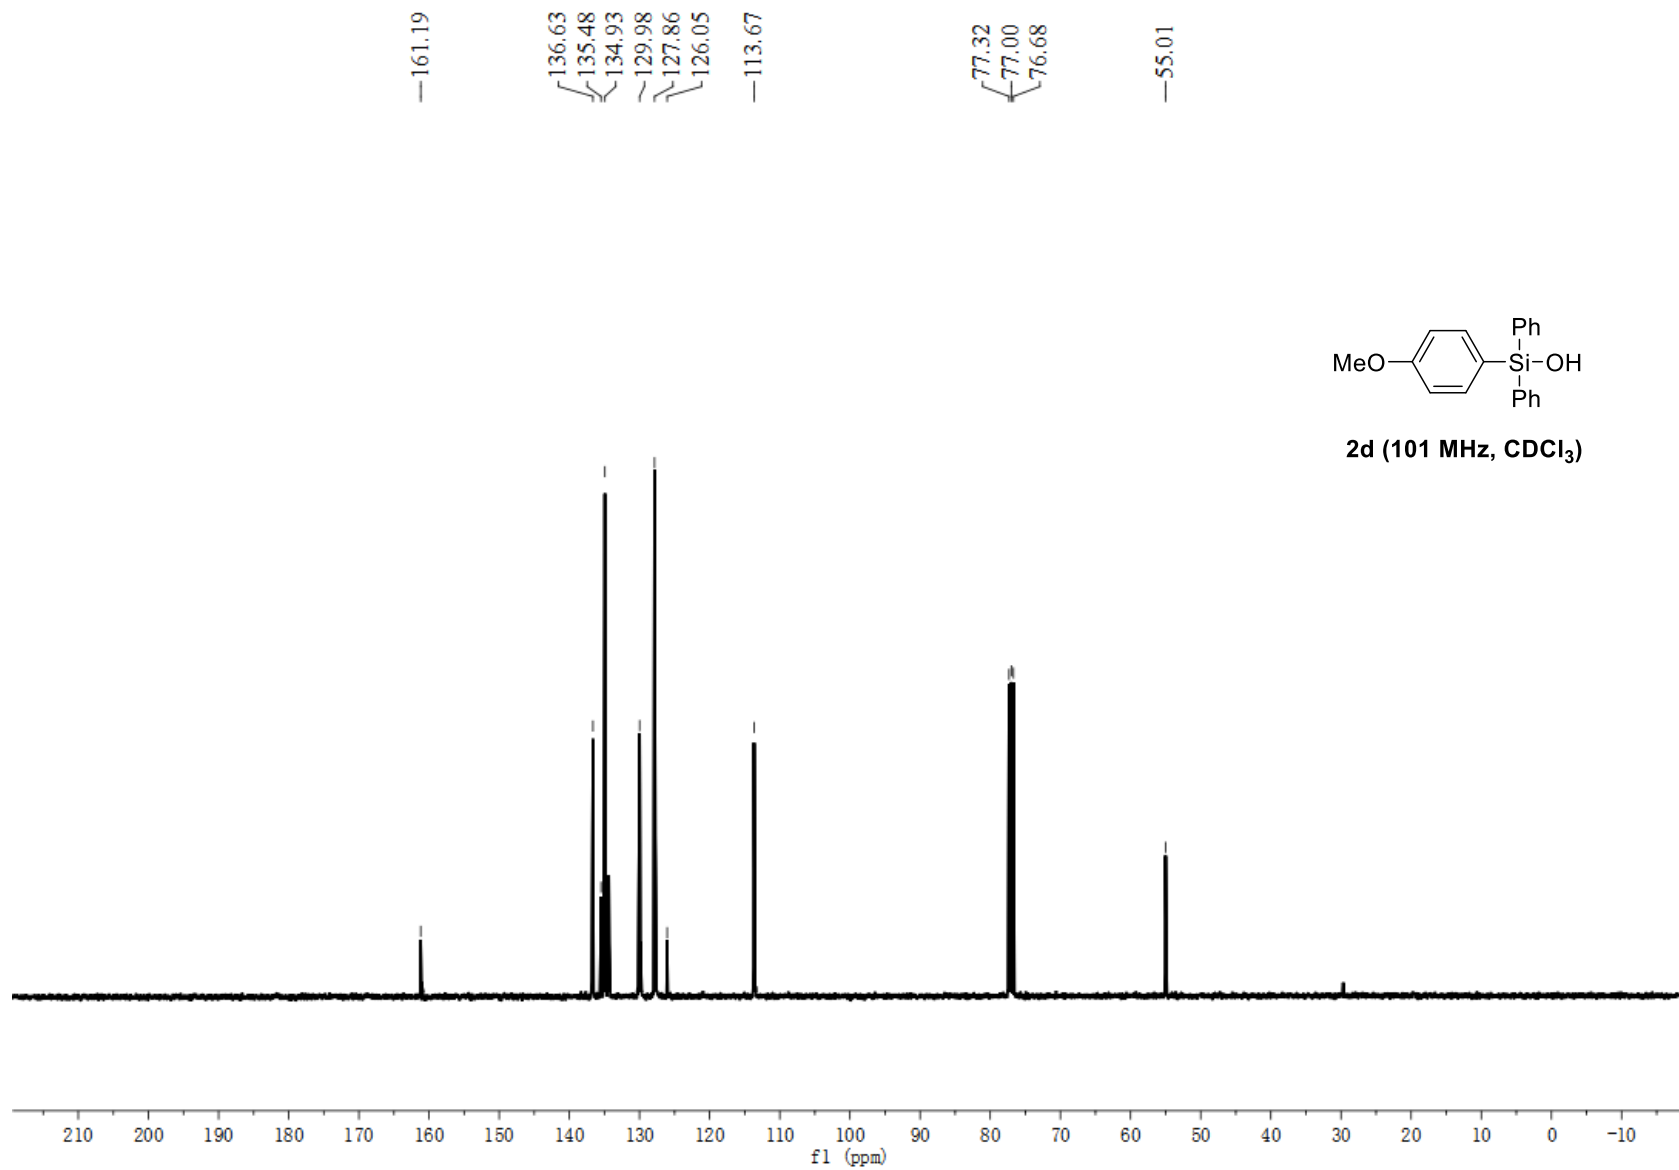

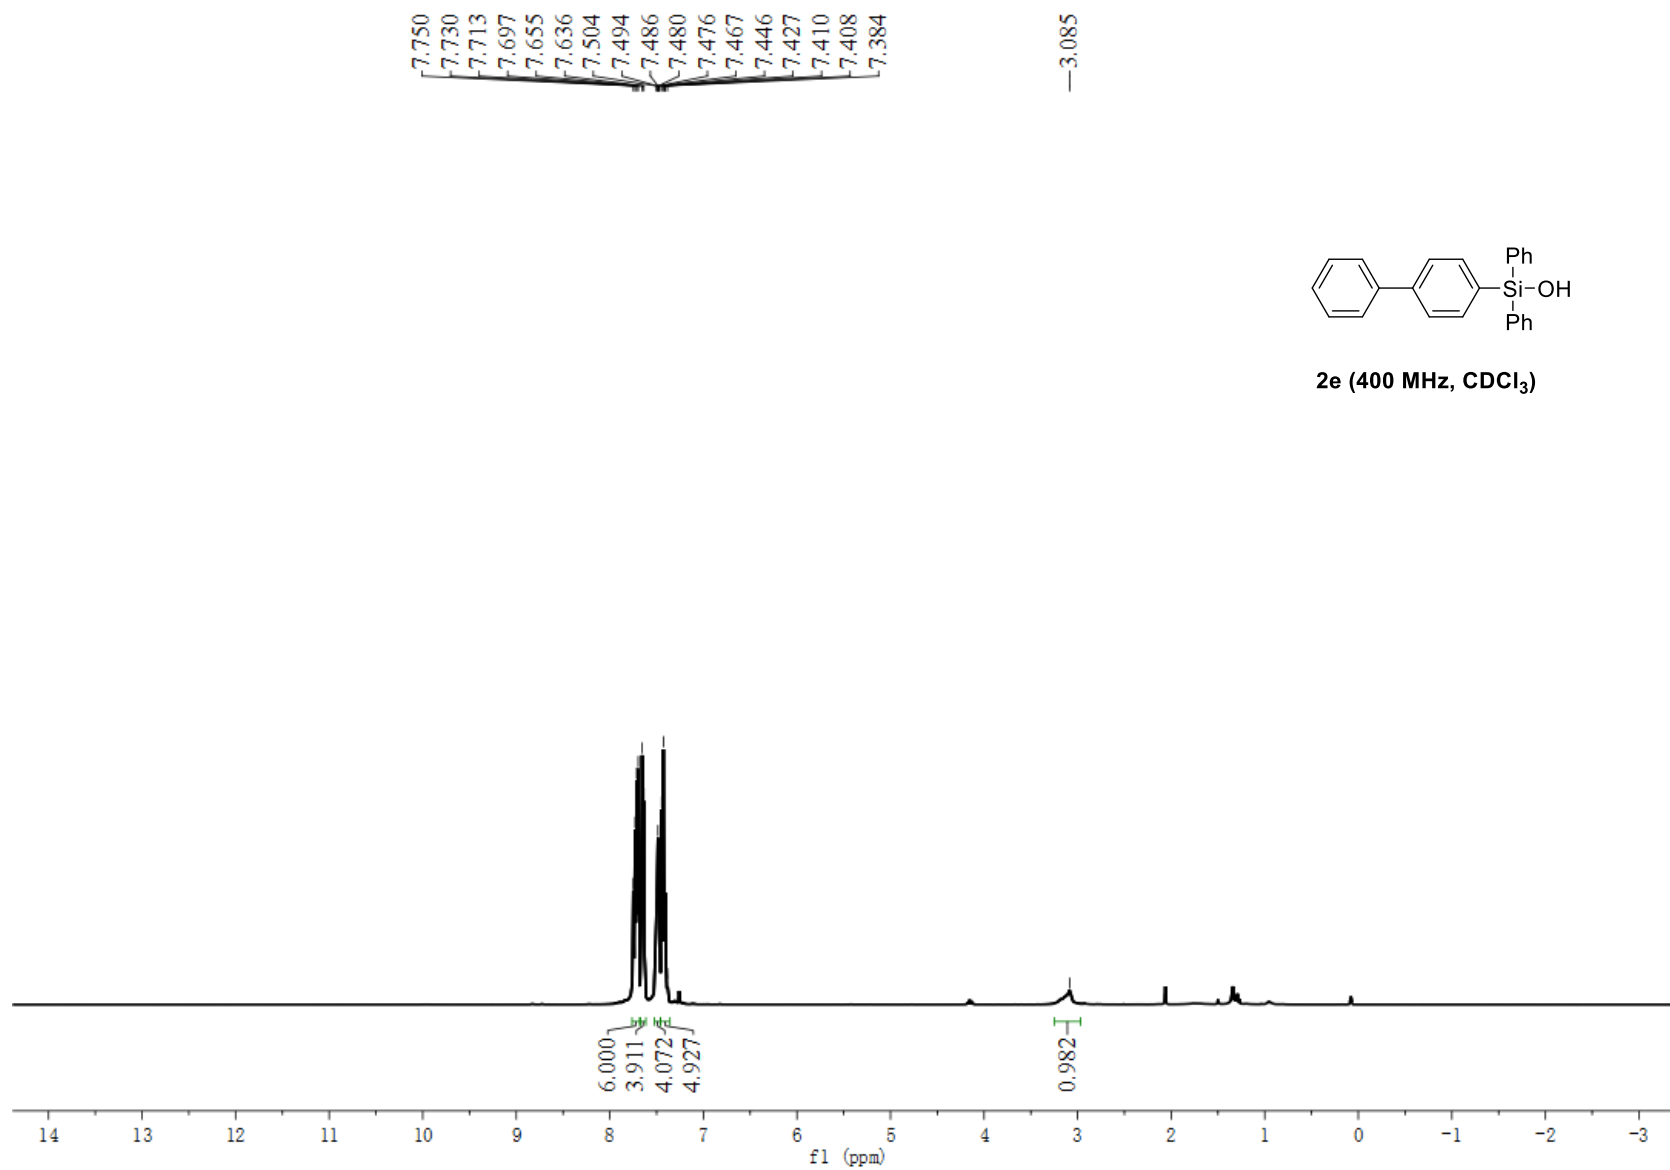

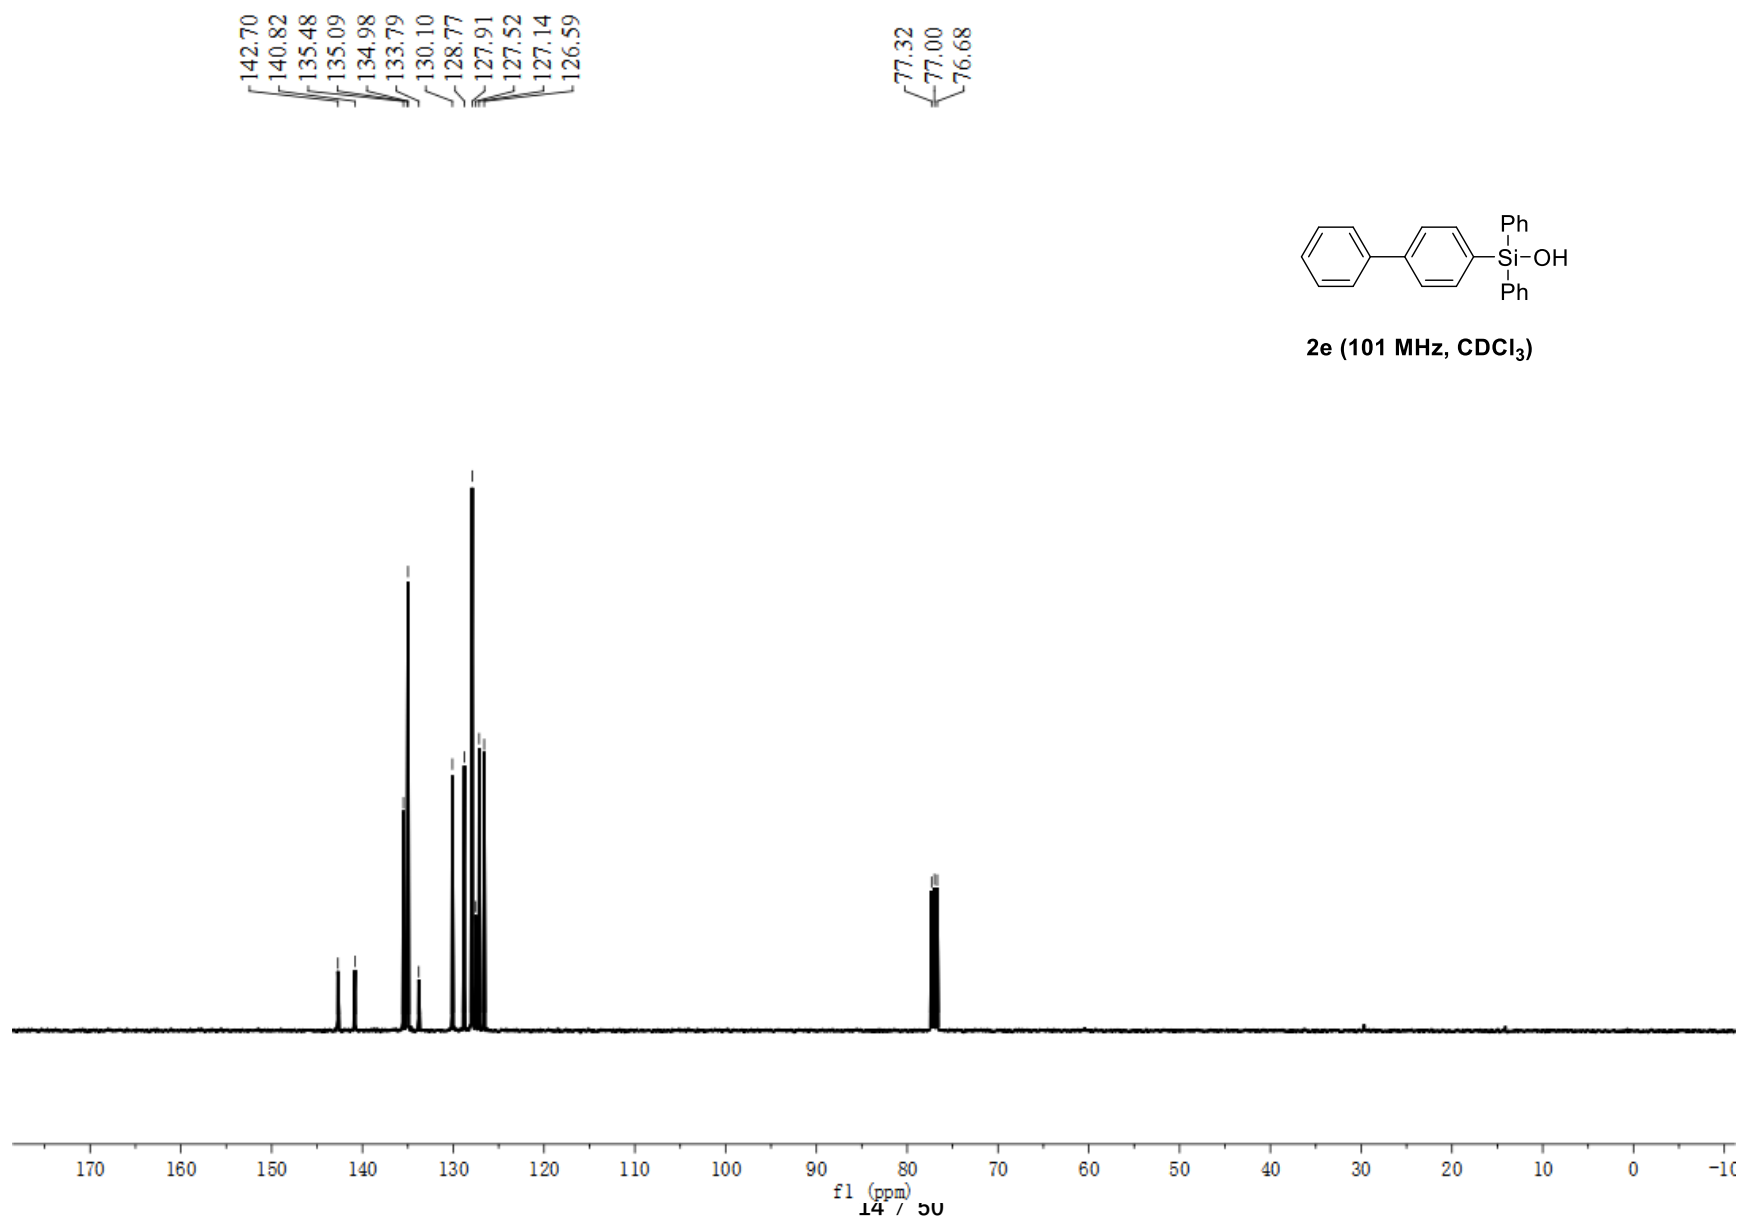

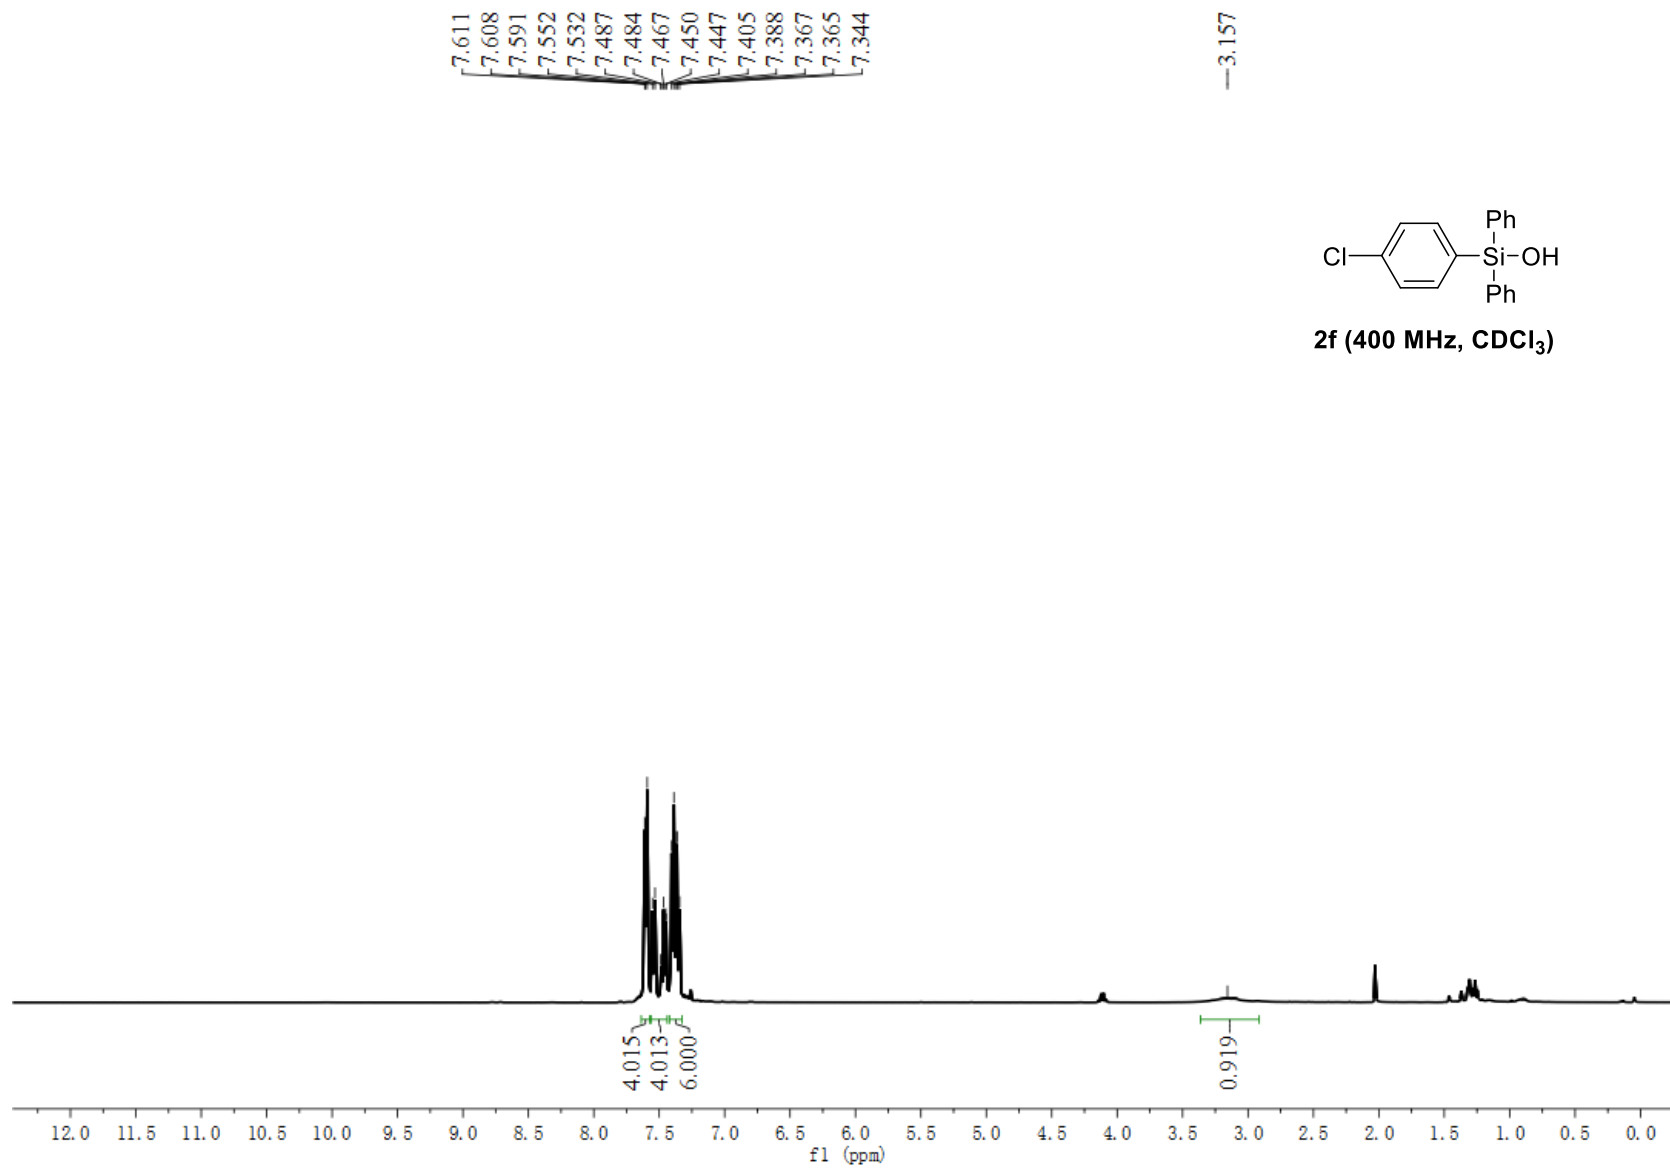

136.47  
136.33  
134.88  
134.61  
133.52  
130.23  
128.14  
127.95

77.32  
77.00  
76.68

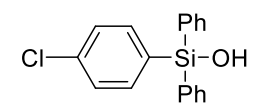

**2f** (101 MHz, CDCl<sub>3</sub>)

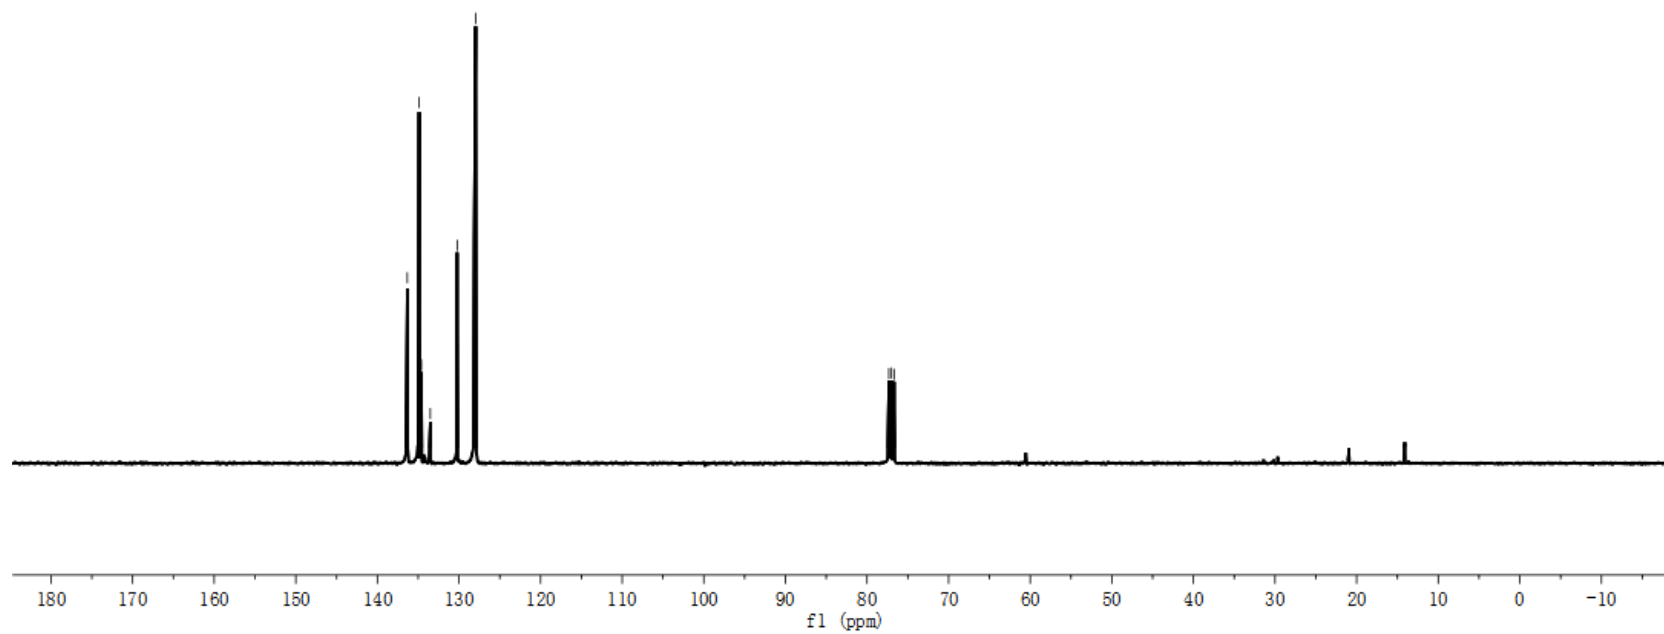



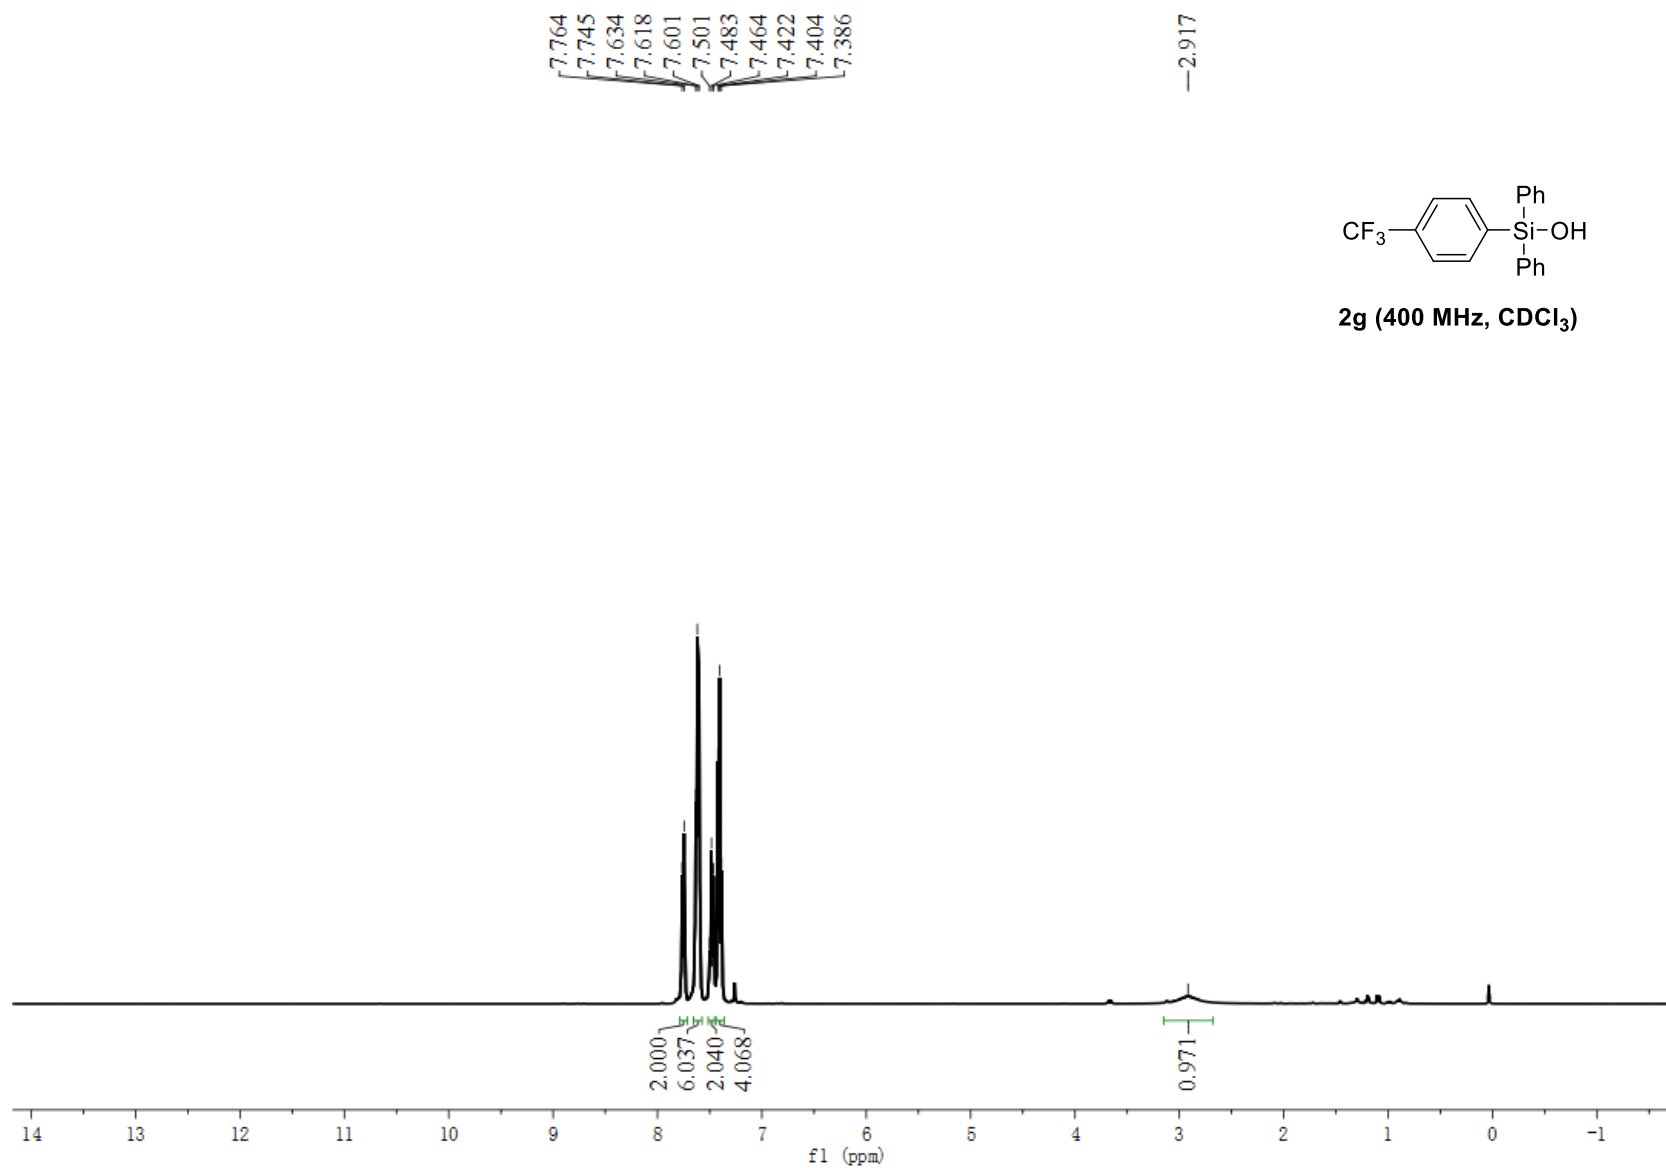

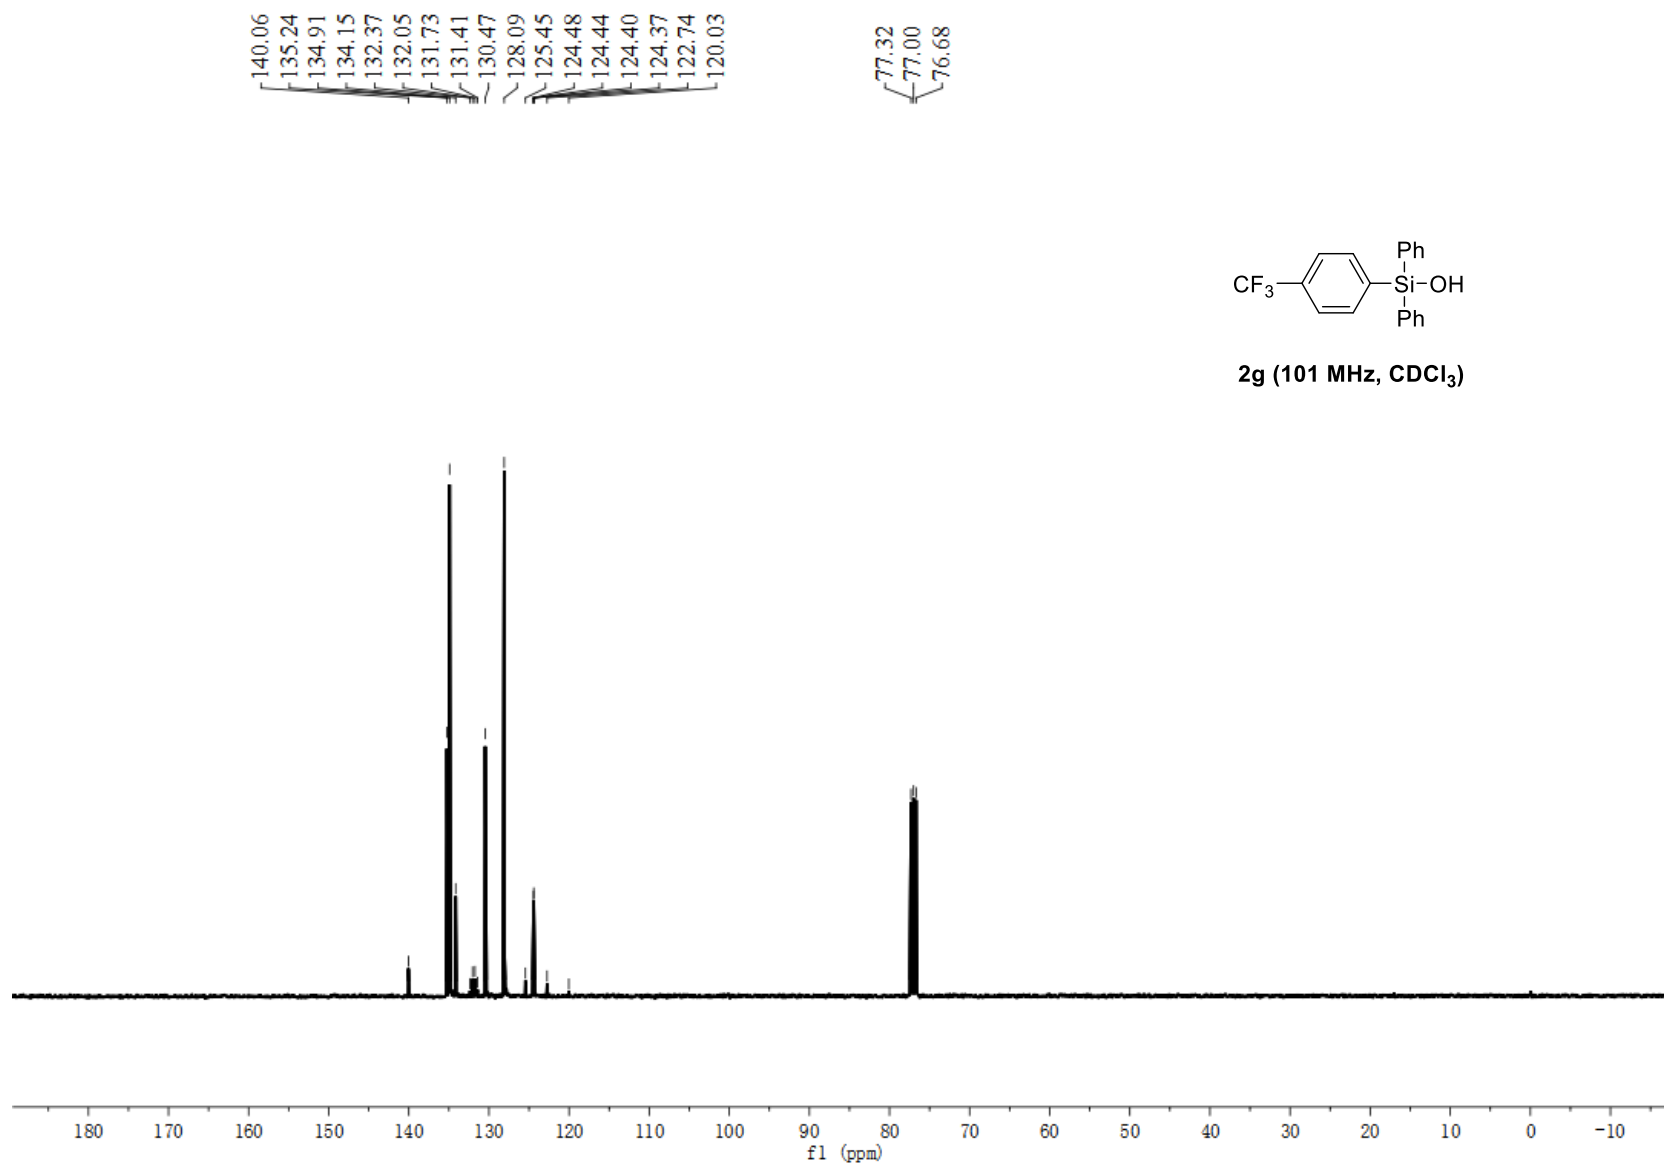

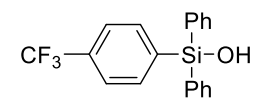

**2g (376 MHz, CDCl<sub>3</sub>)**

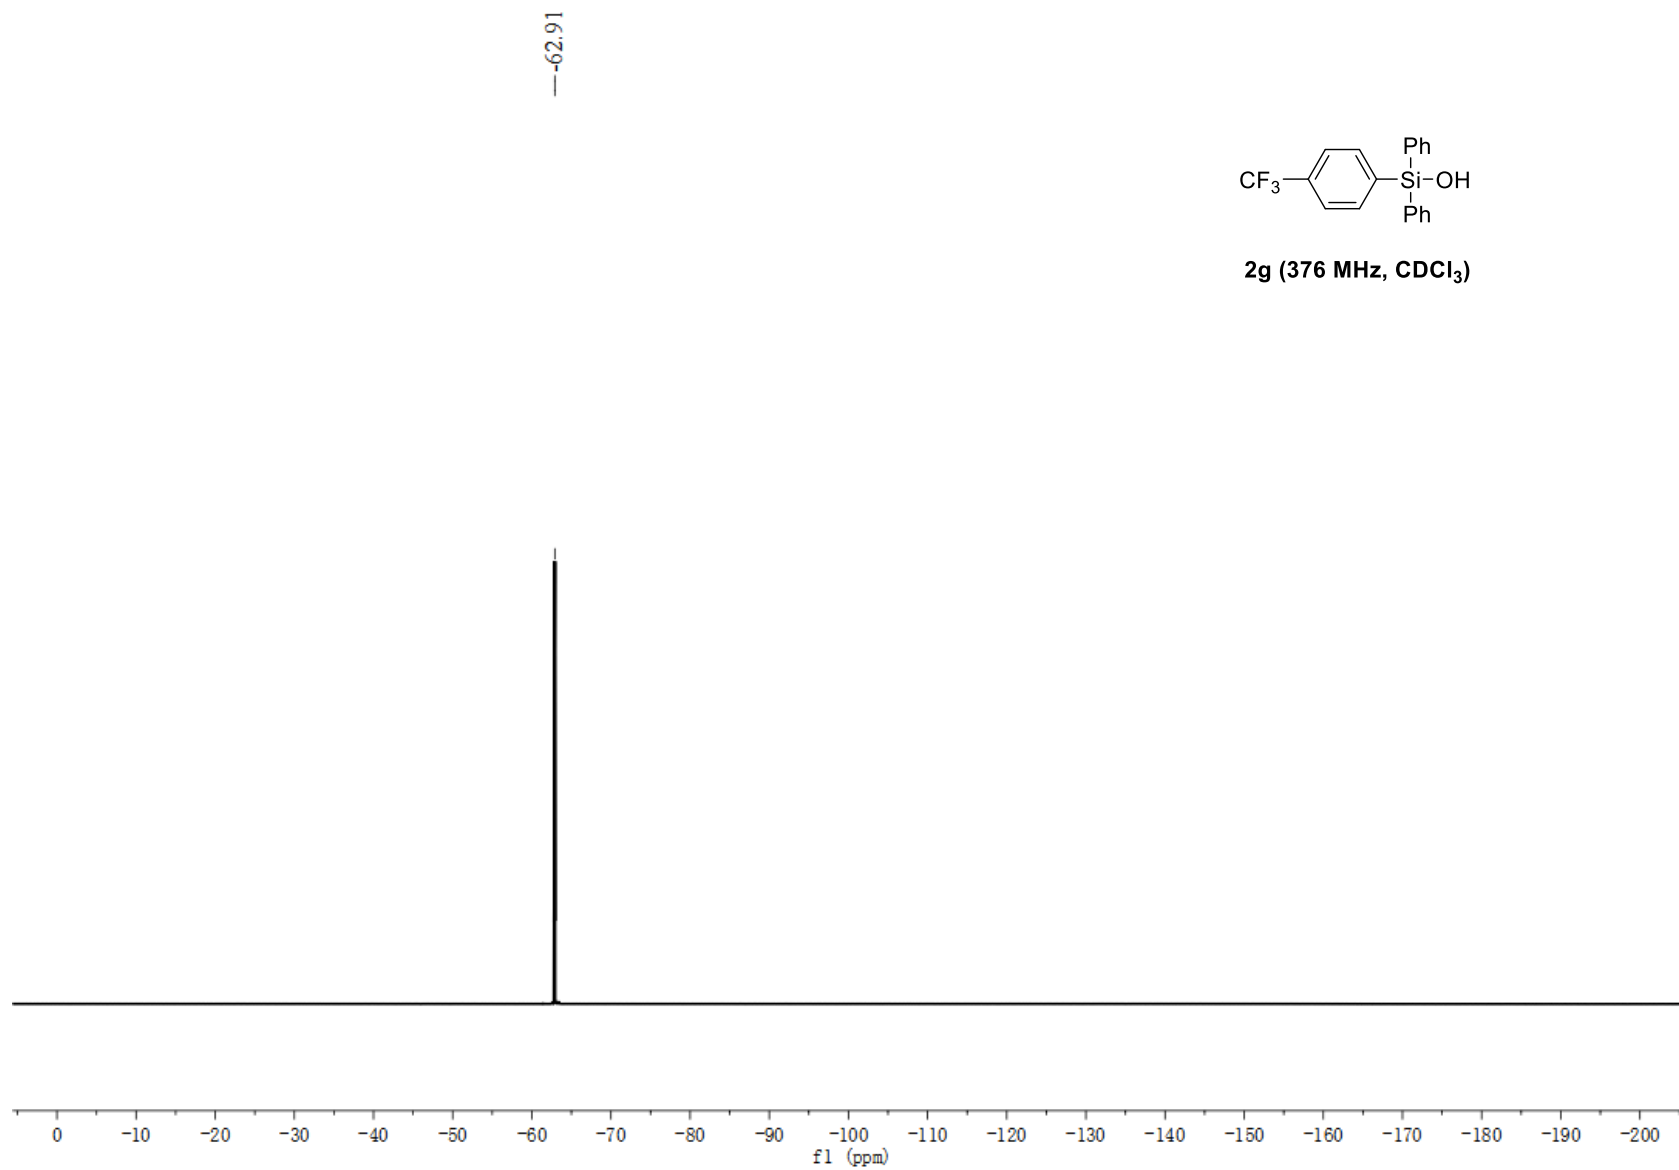

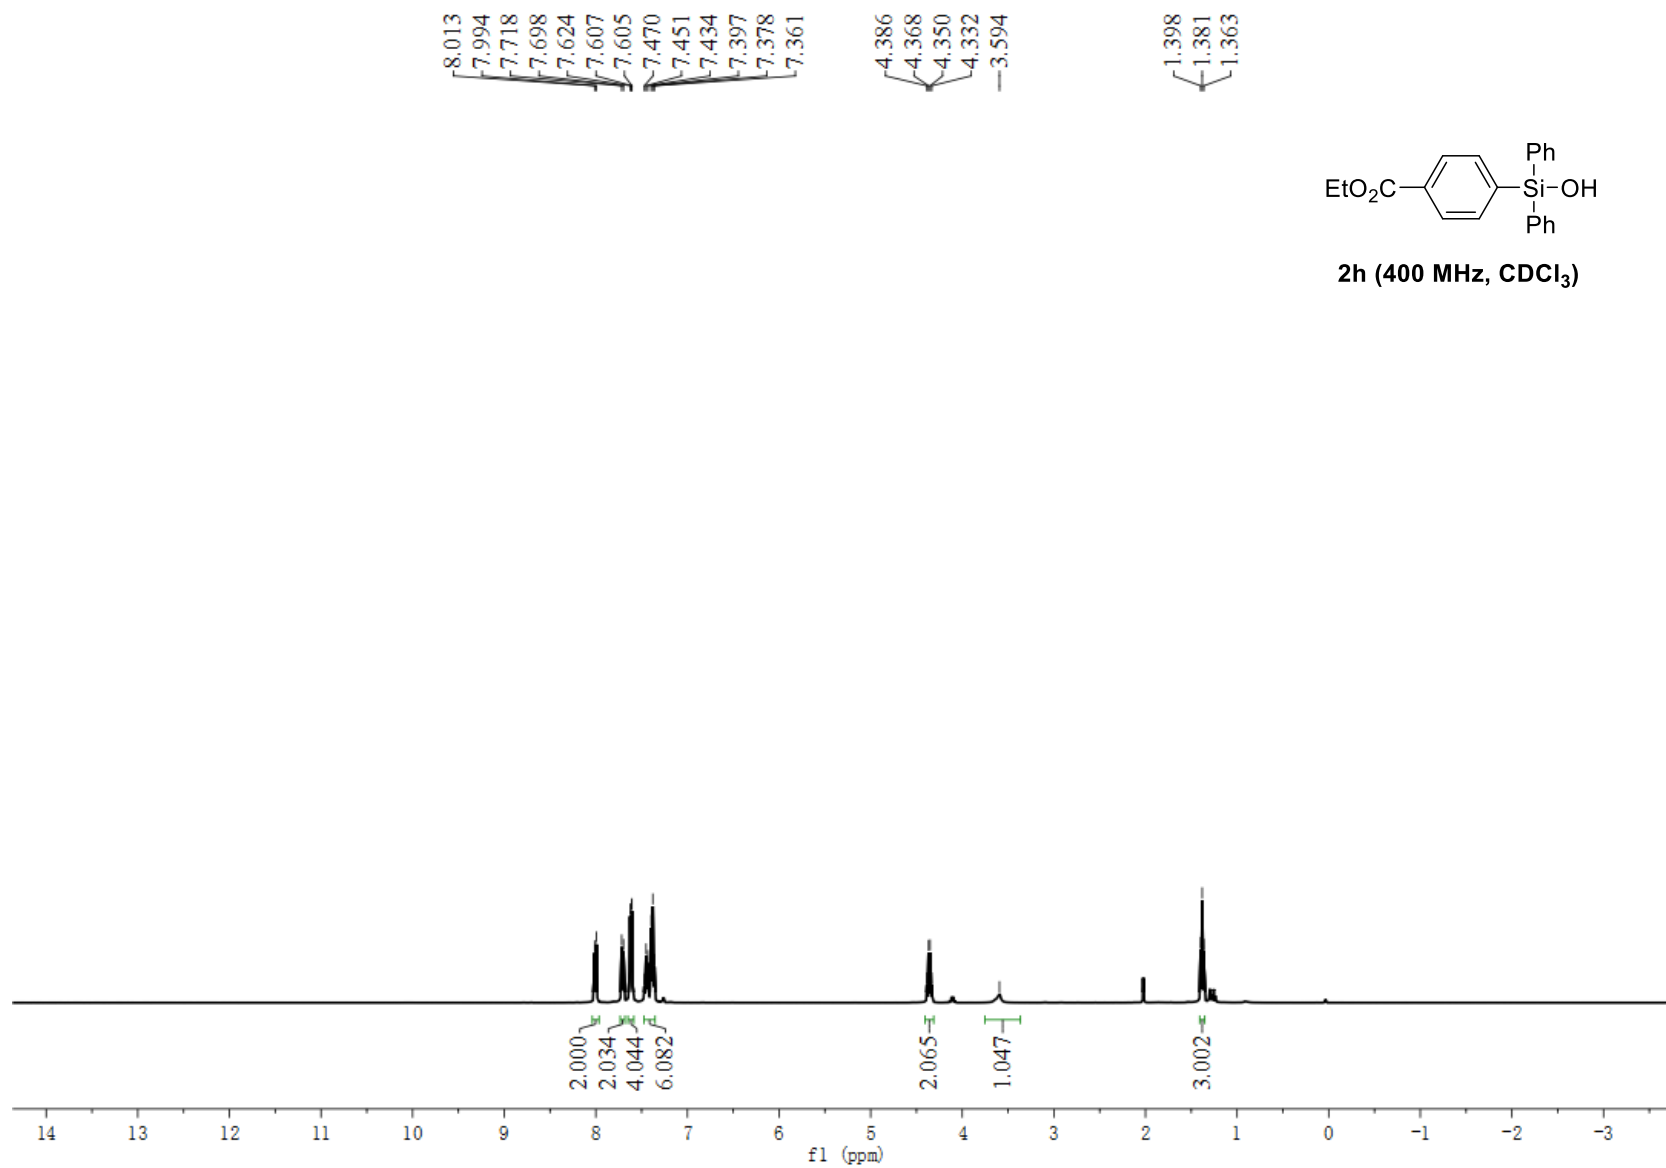

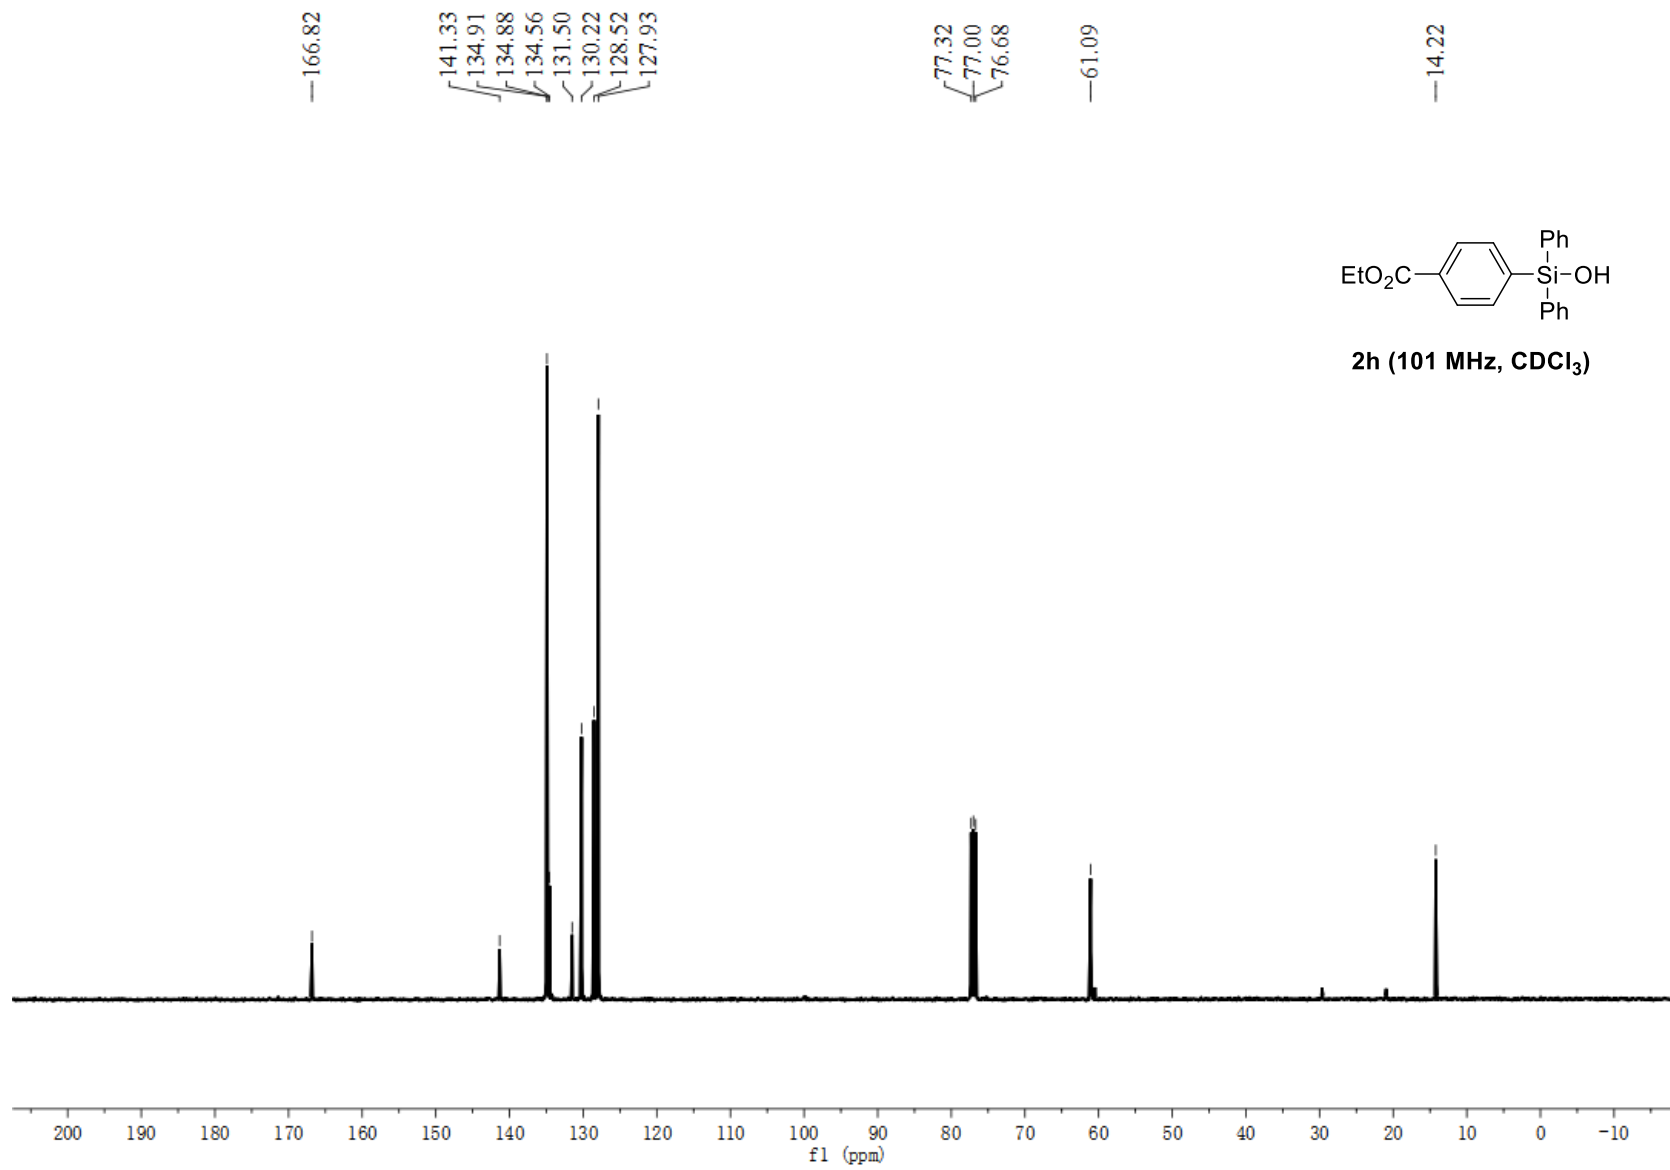

7.740  
7.720  
7.610  
7.606  
7.599  
7.590  
7.582  
7.579  
7.496  
7.478  
7.459  
7.418  
7.399  
7.381

— 3.384

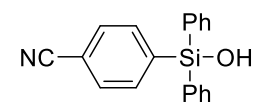

2i (400 MHz, CDCl<sub>3</sub>)

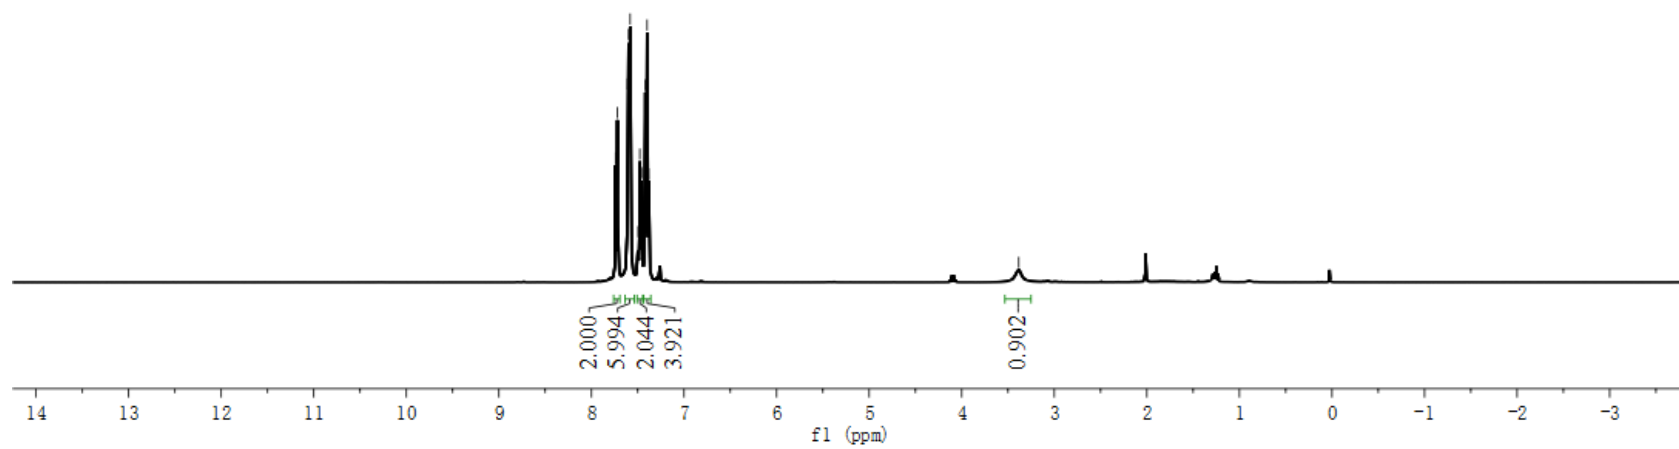

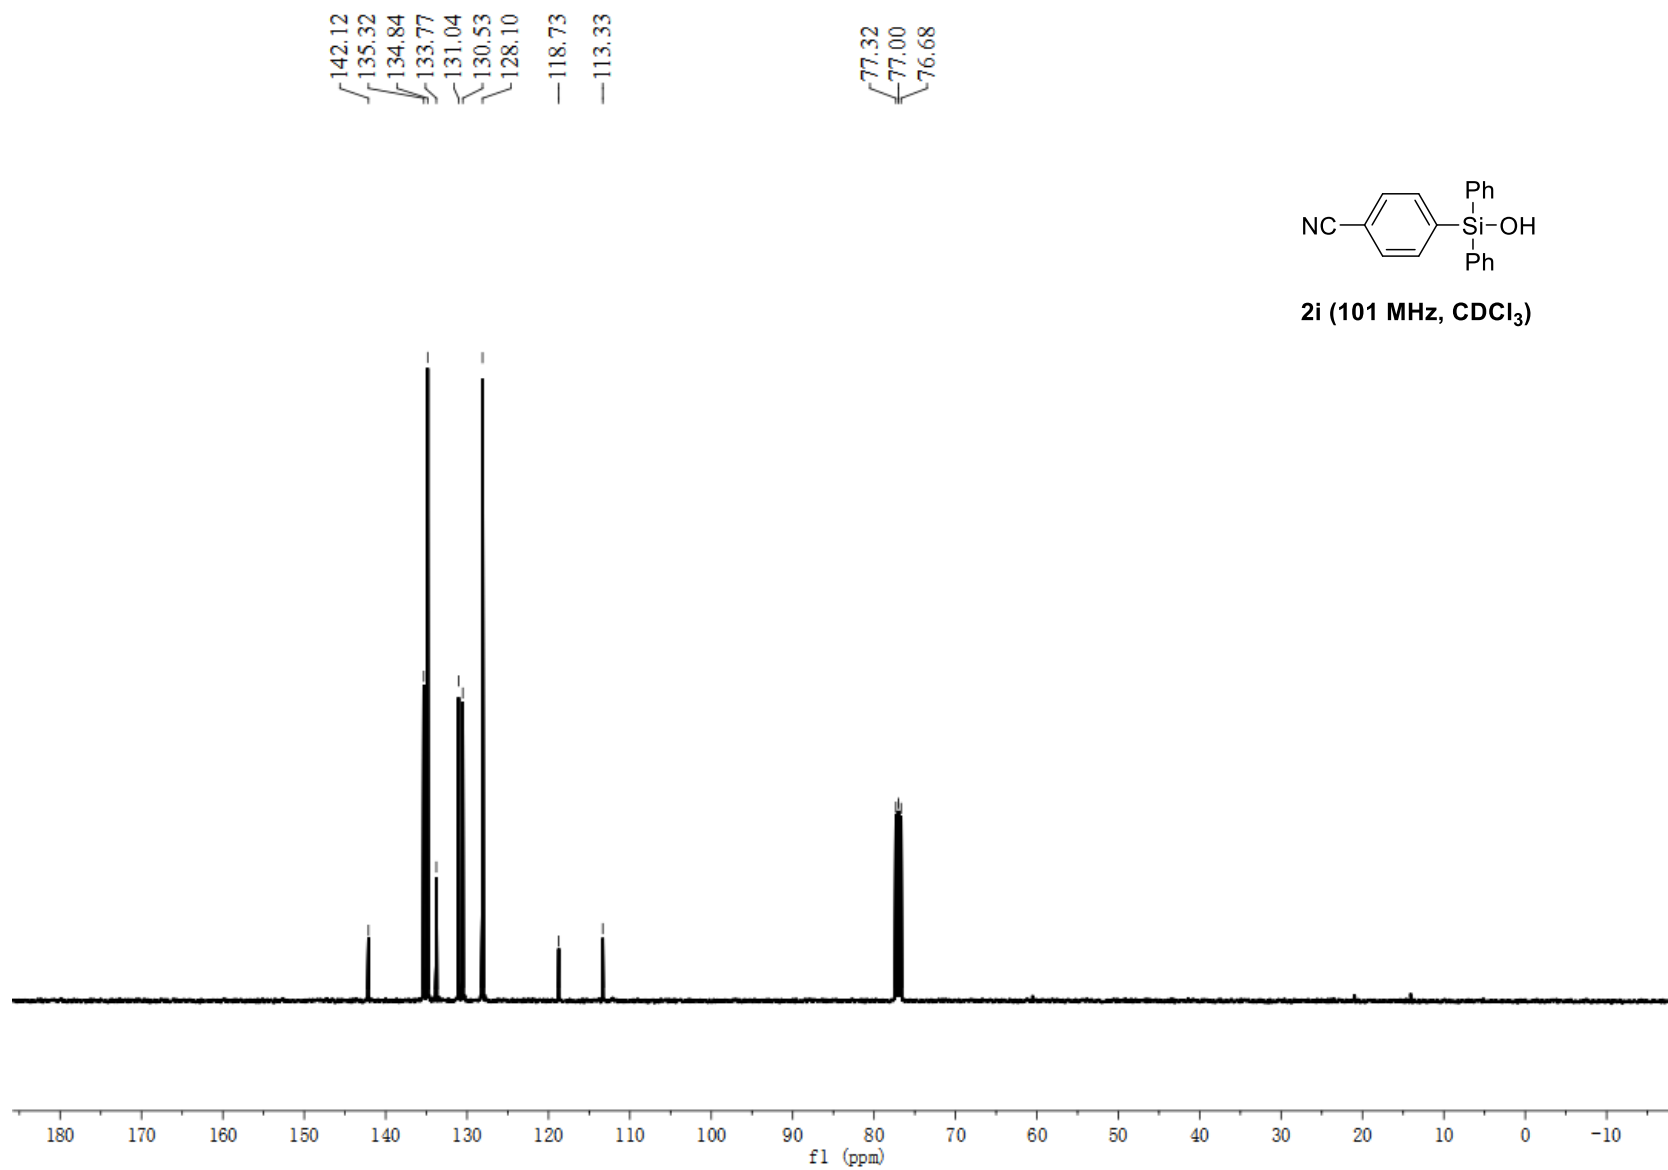

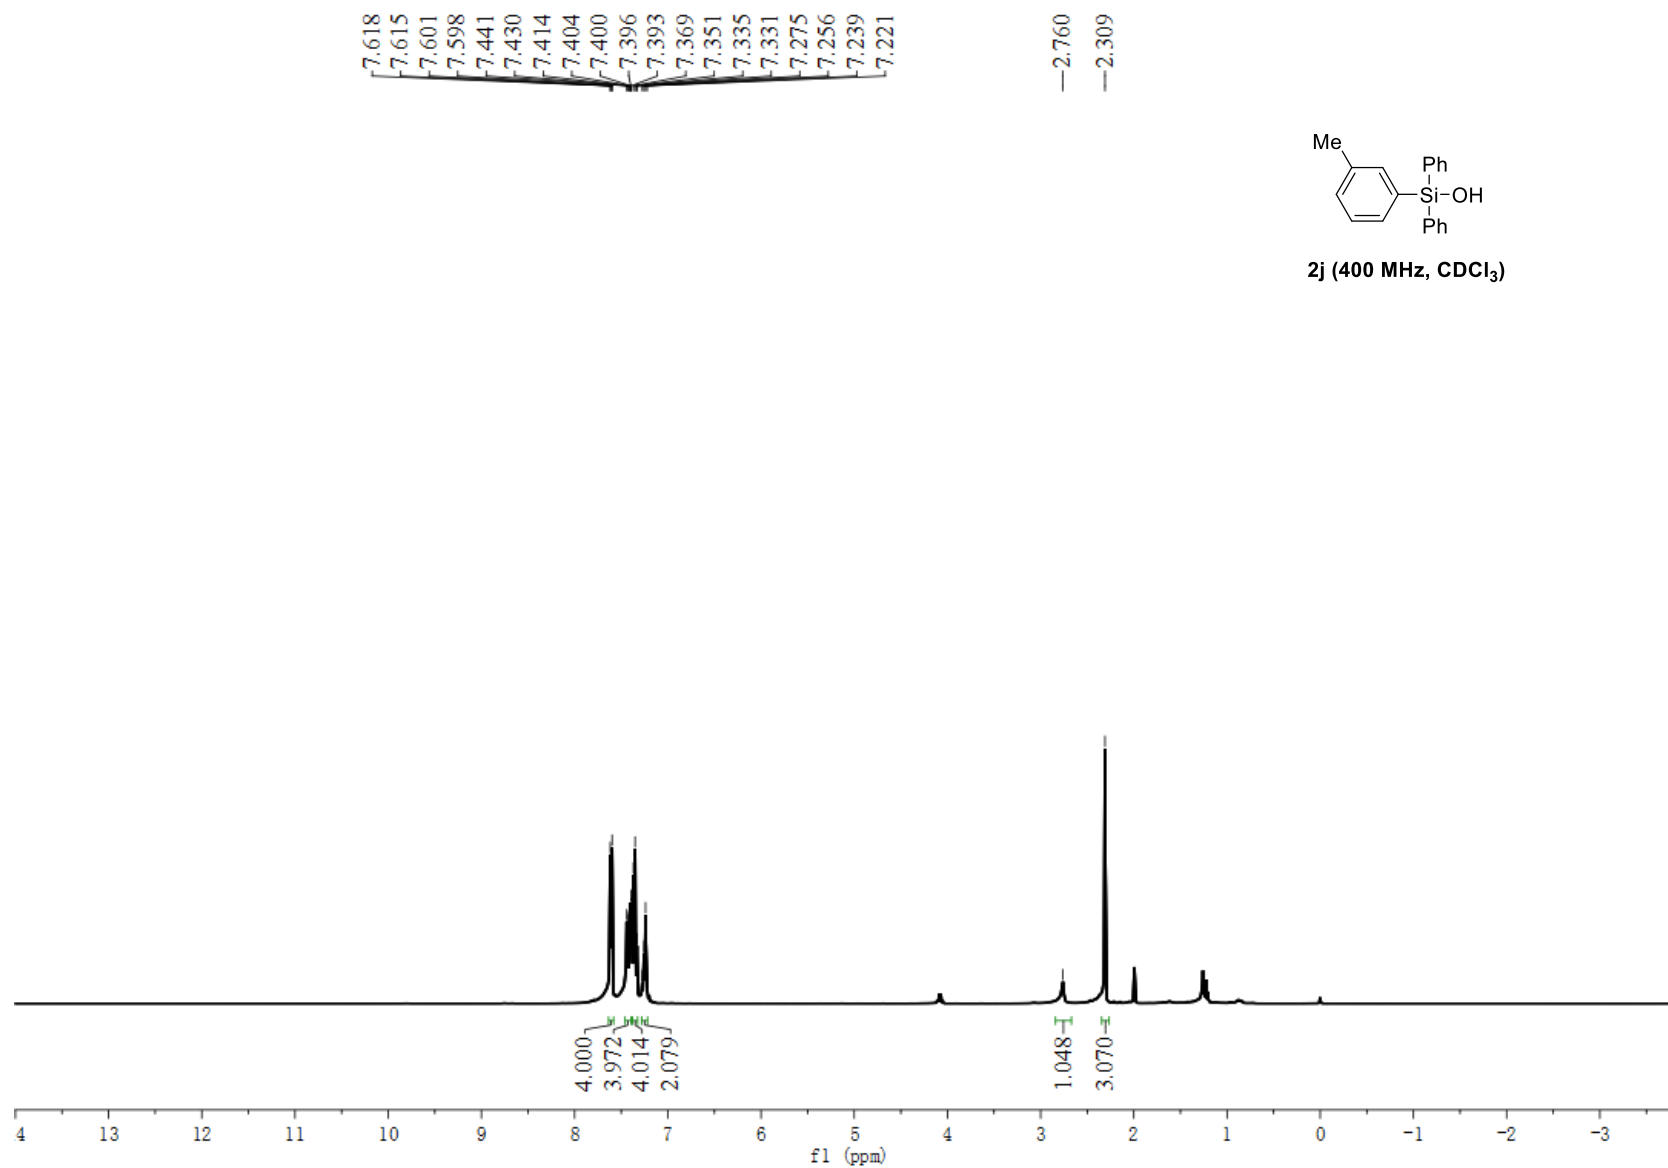



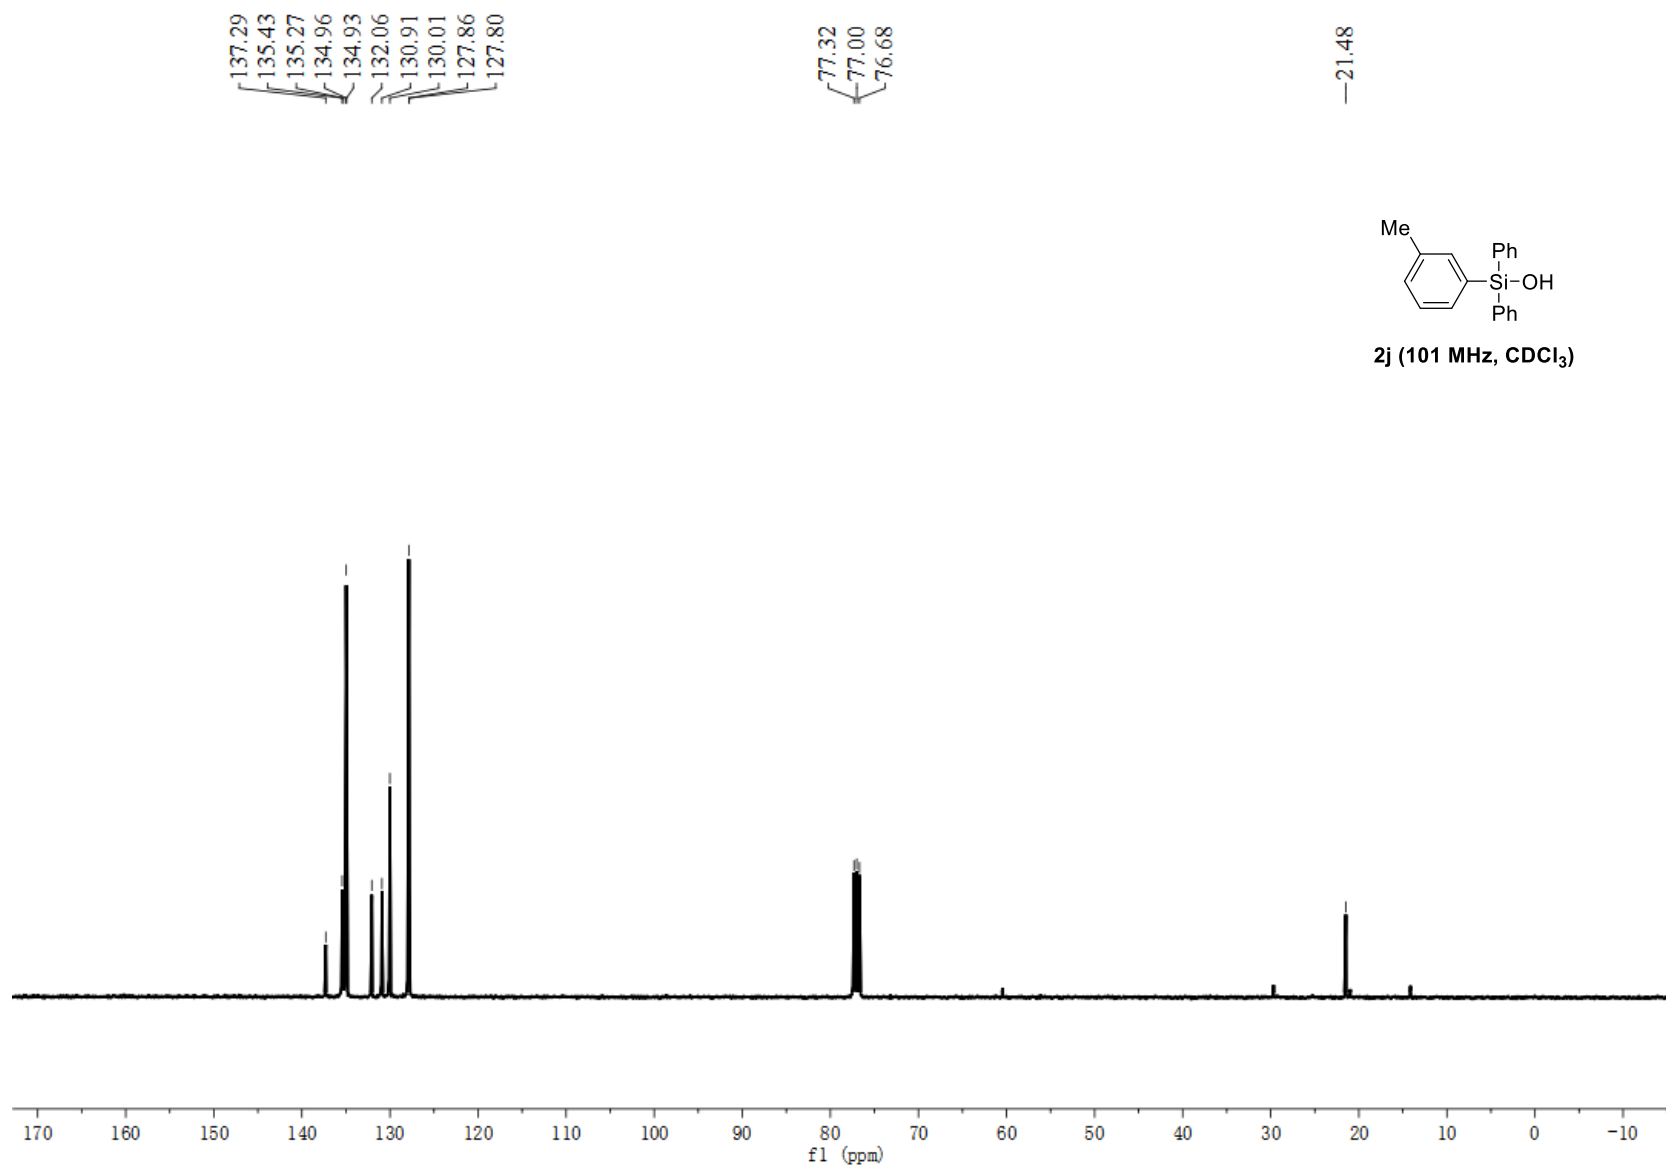

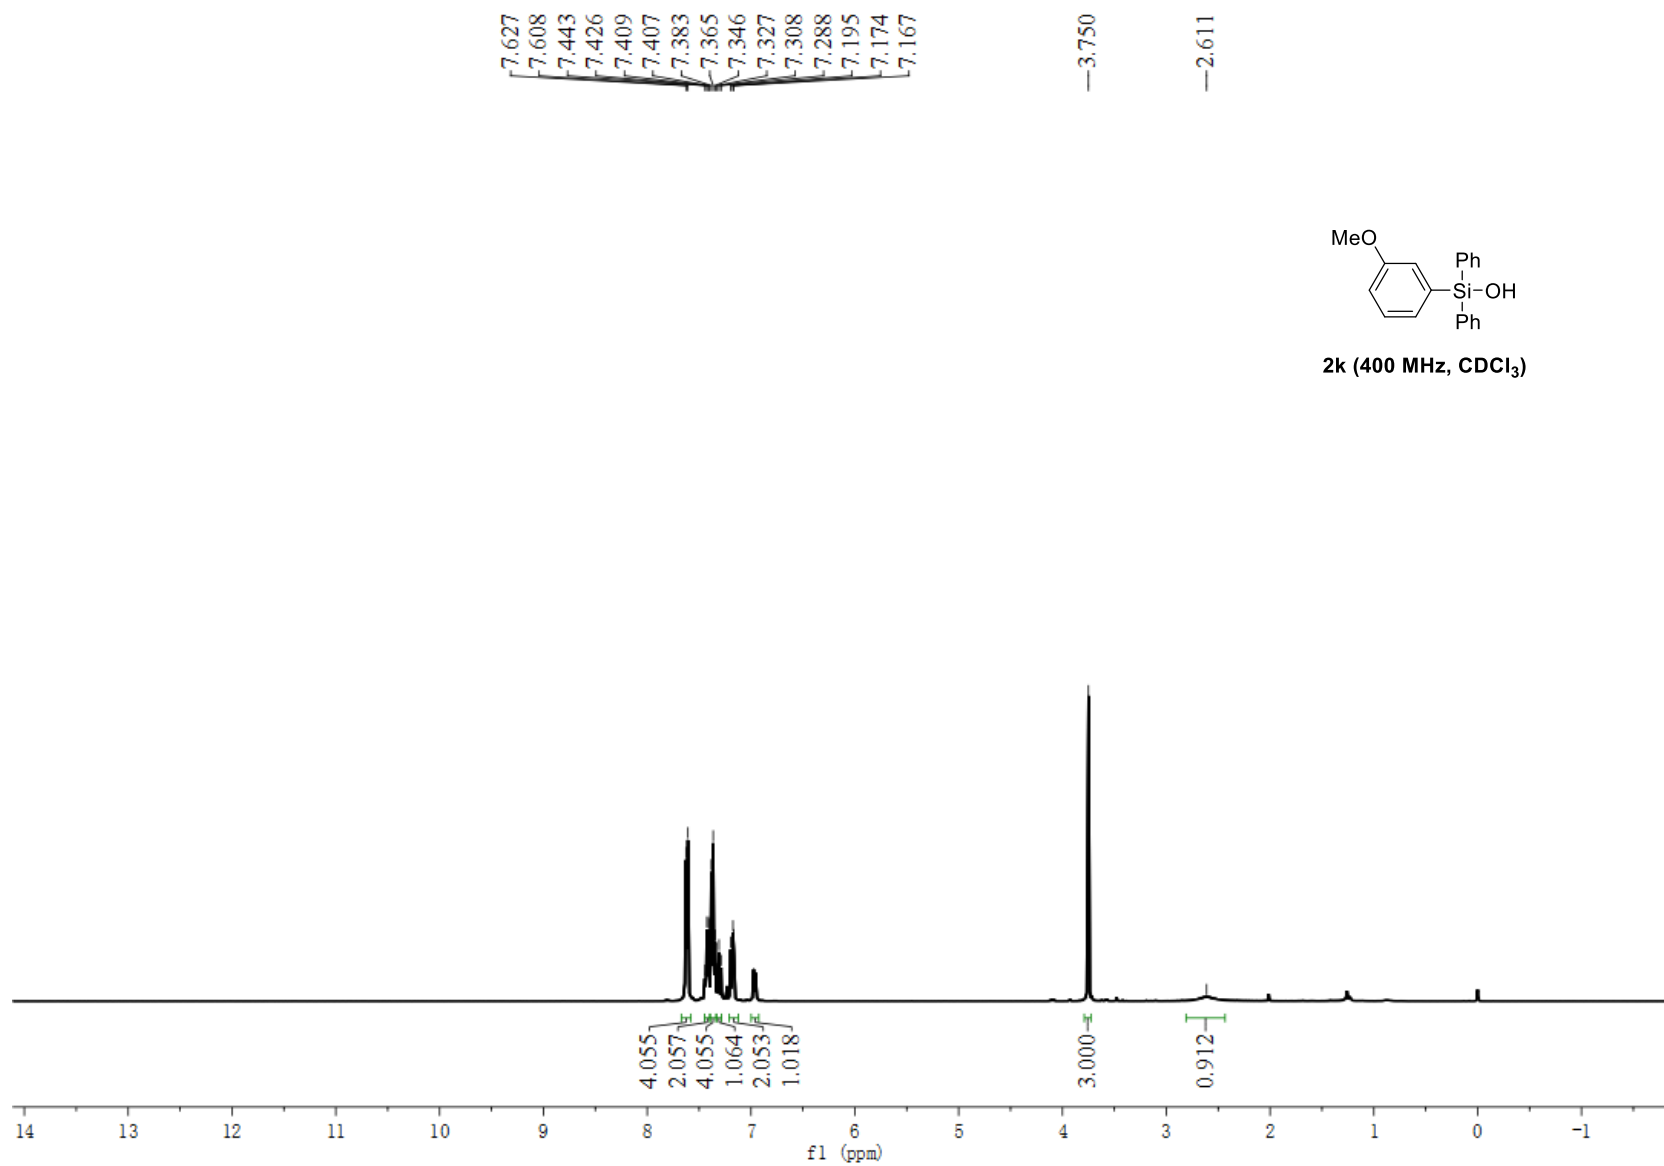

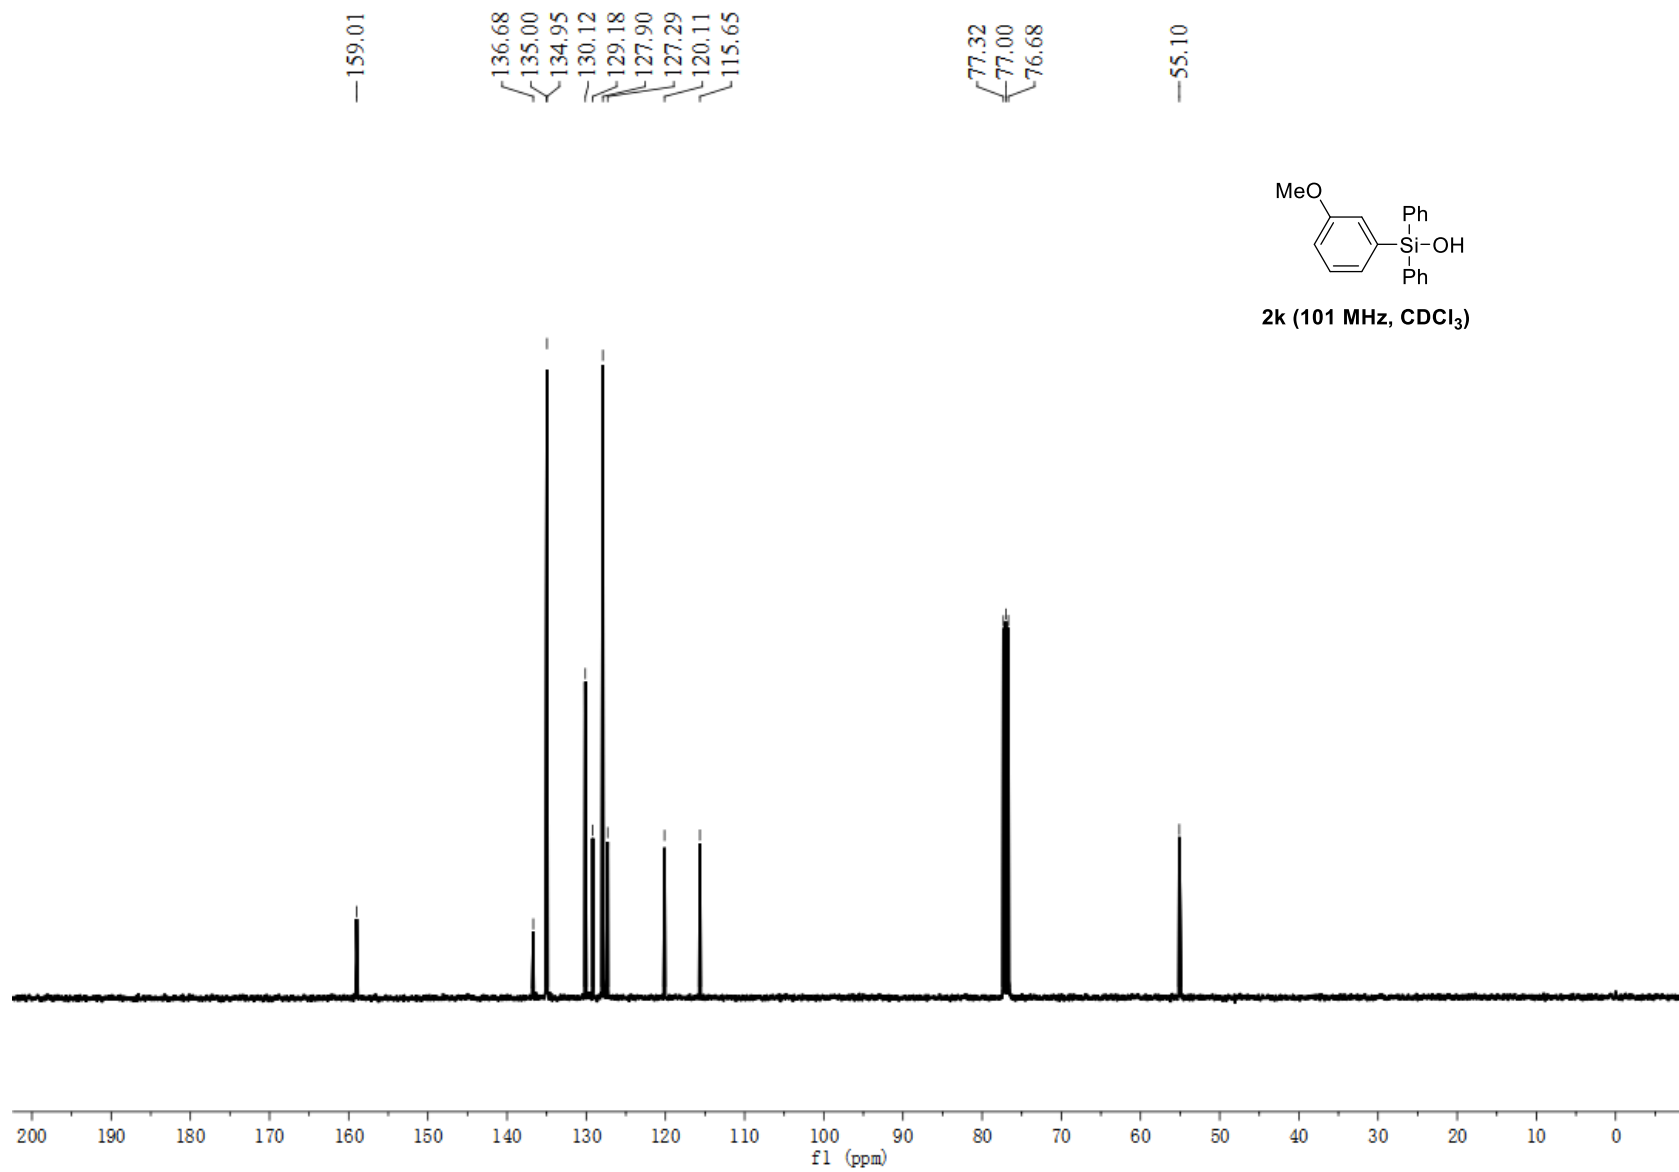

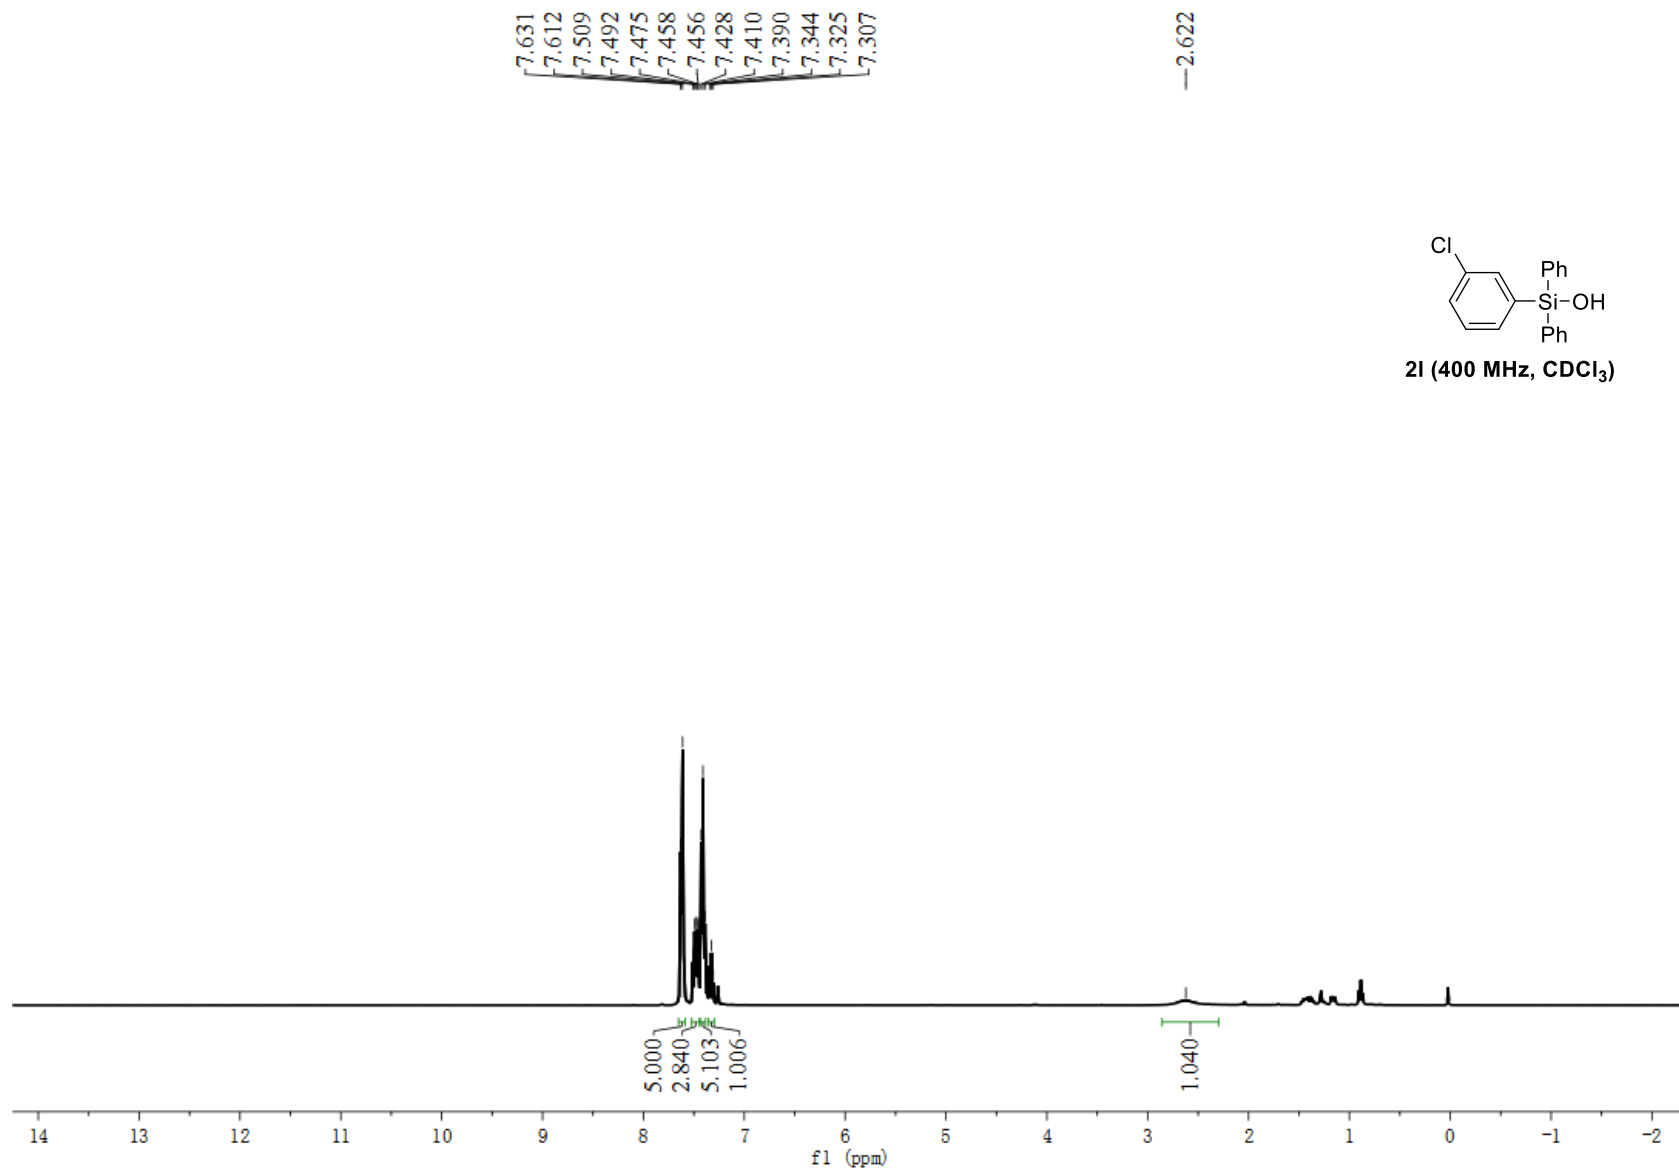

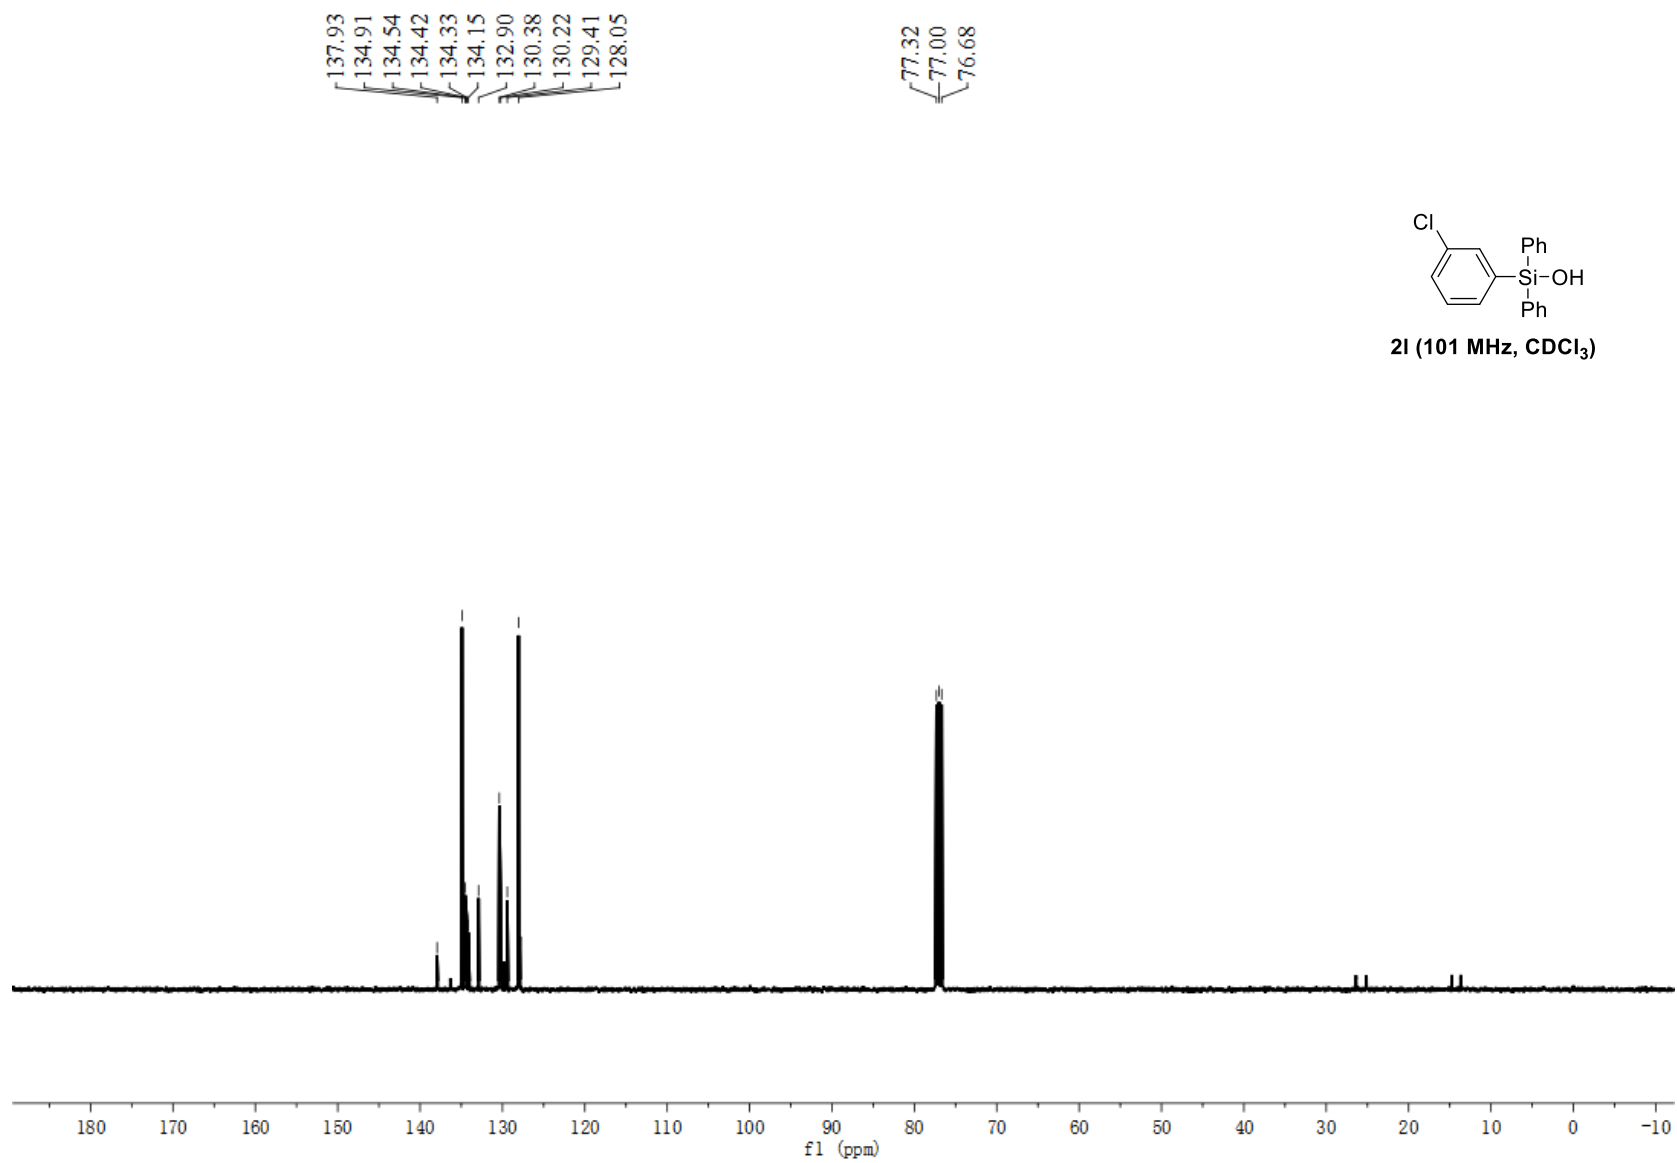

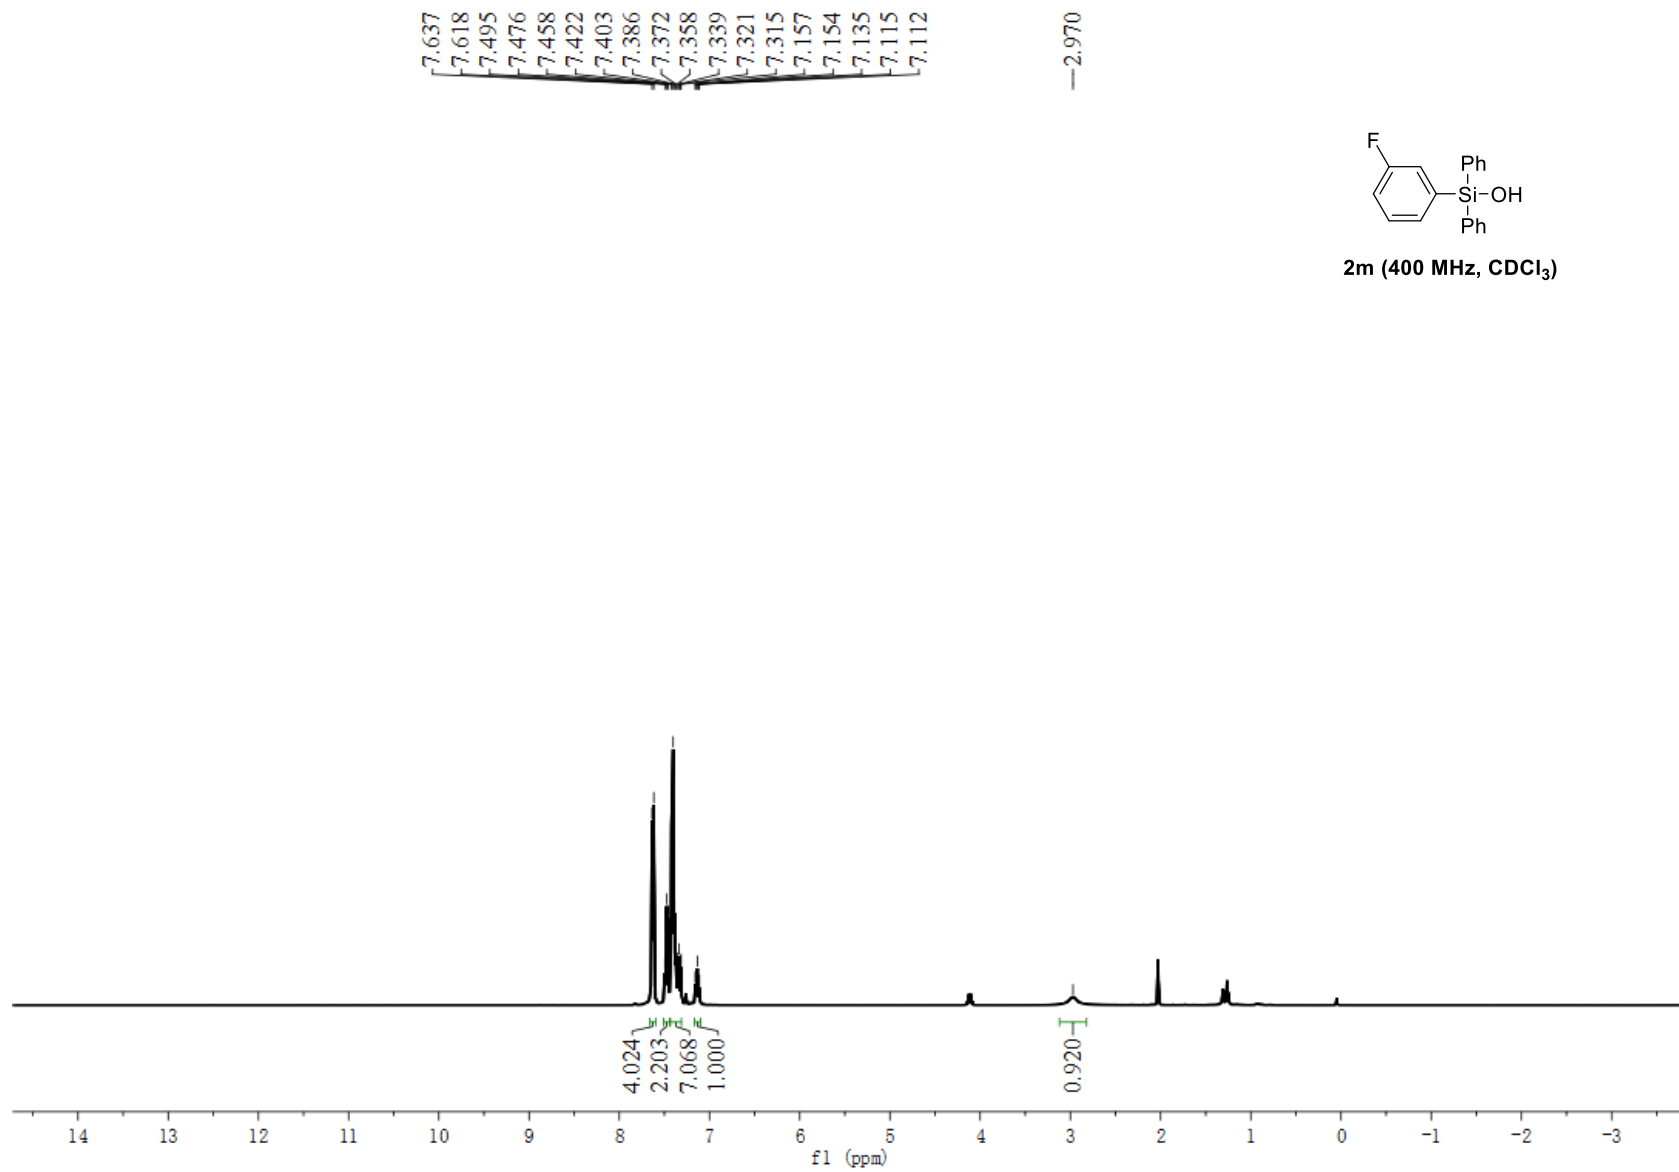

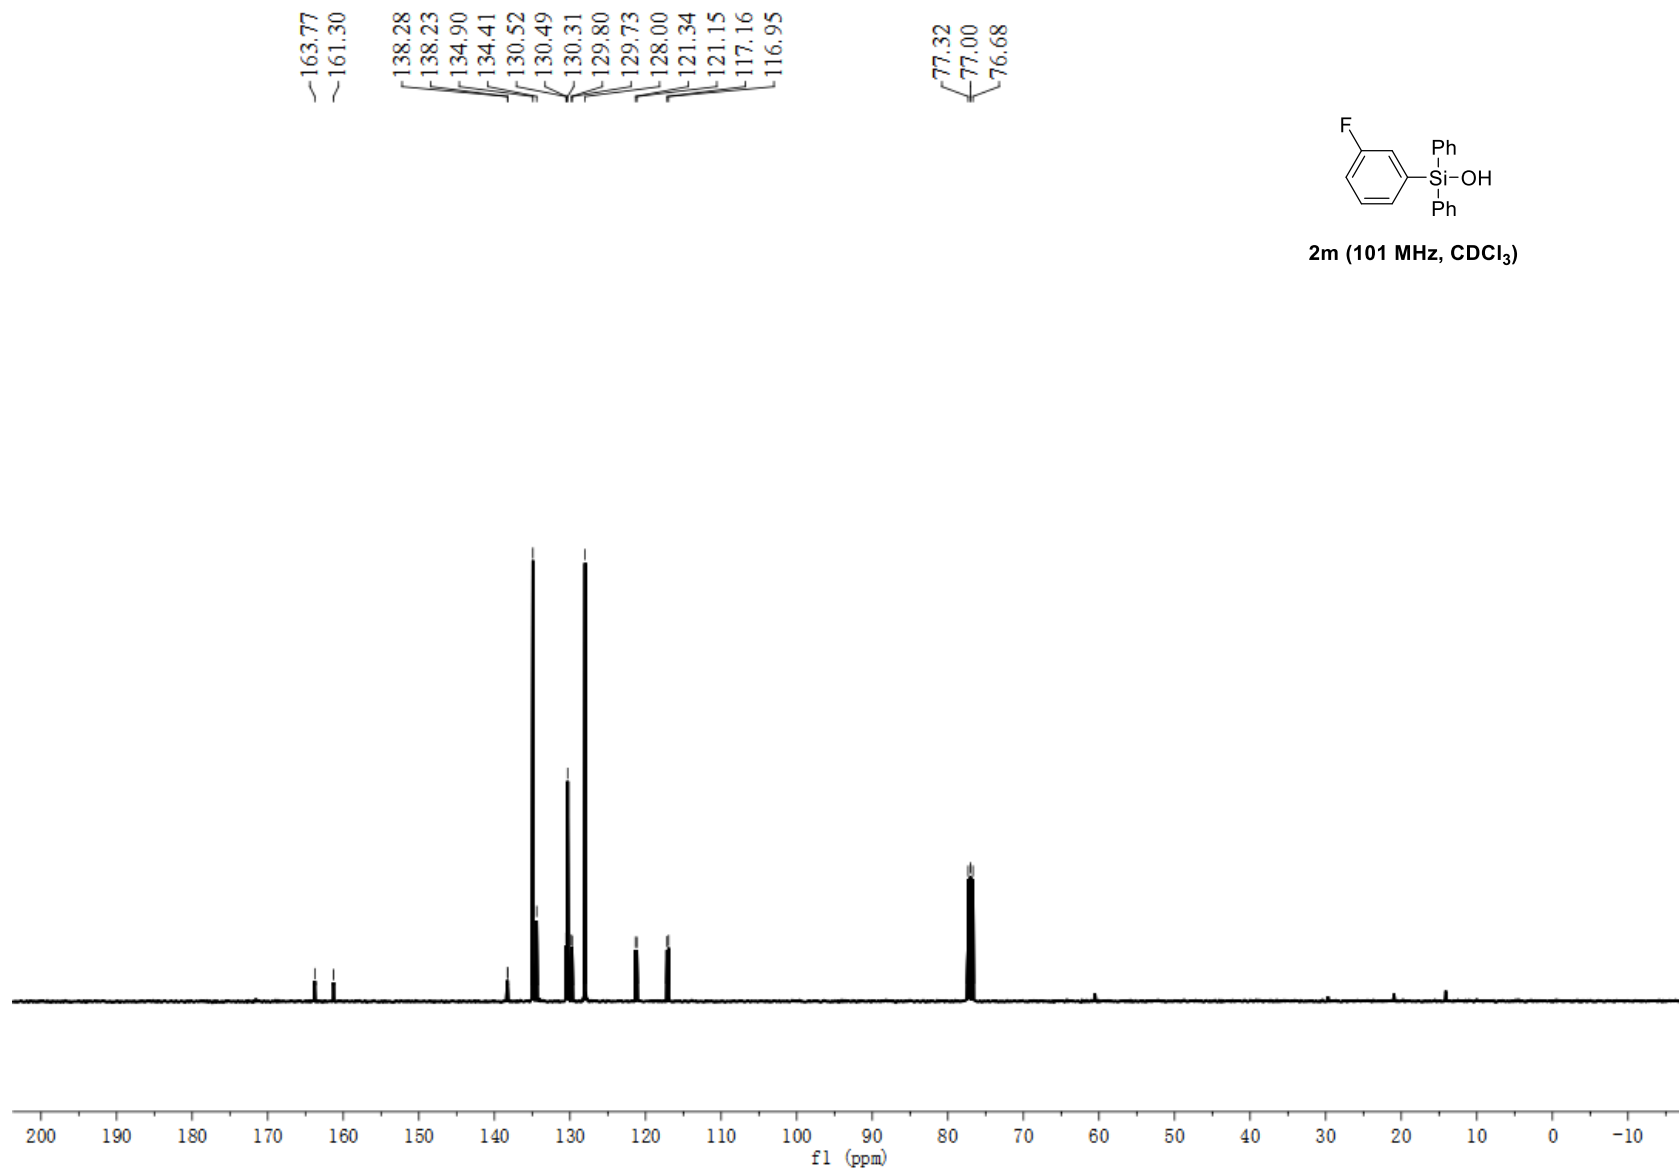

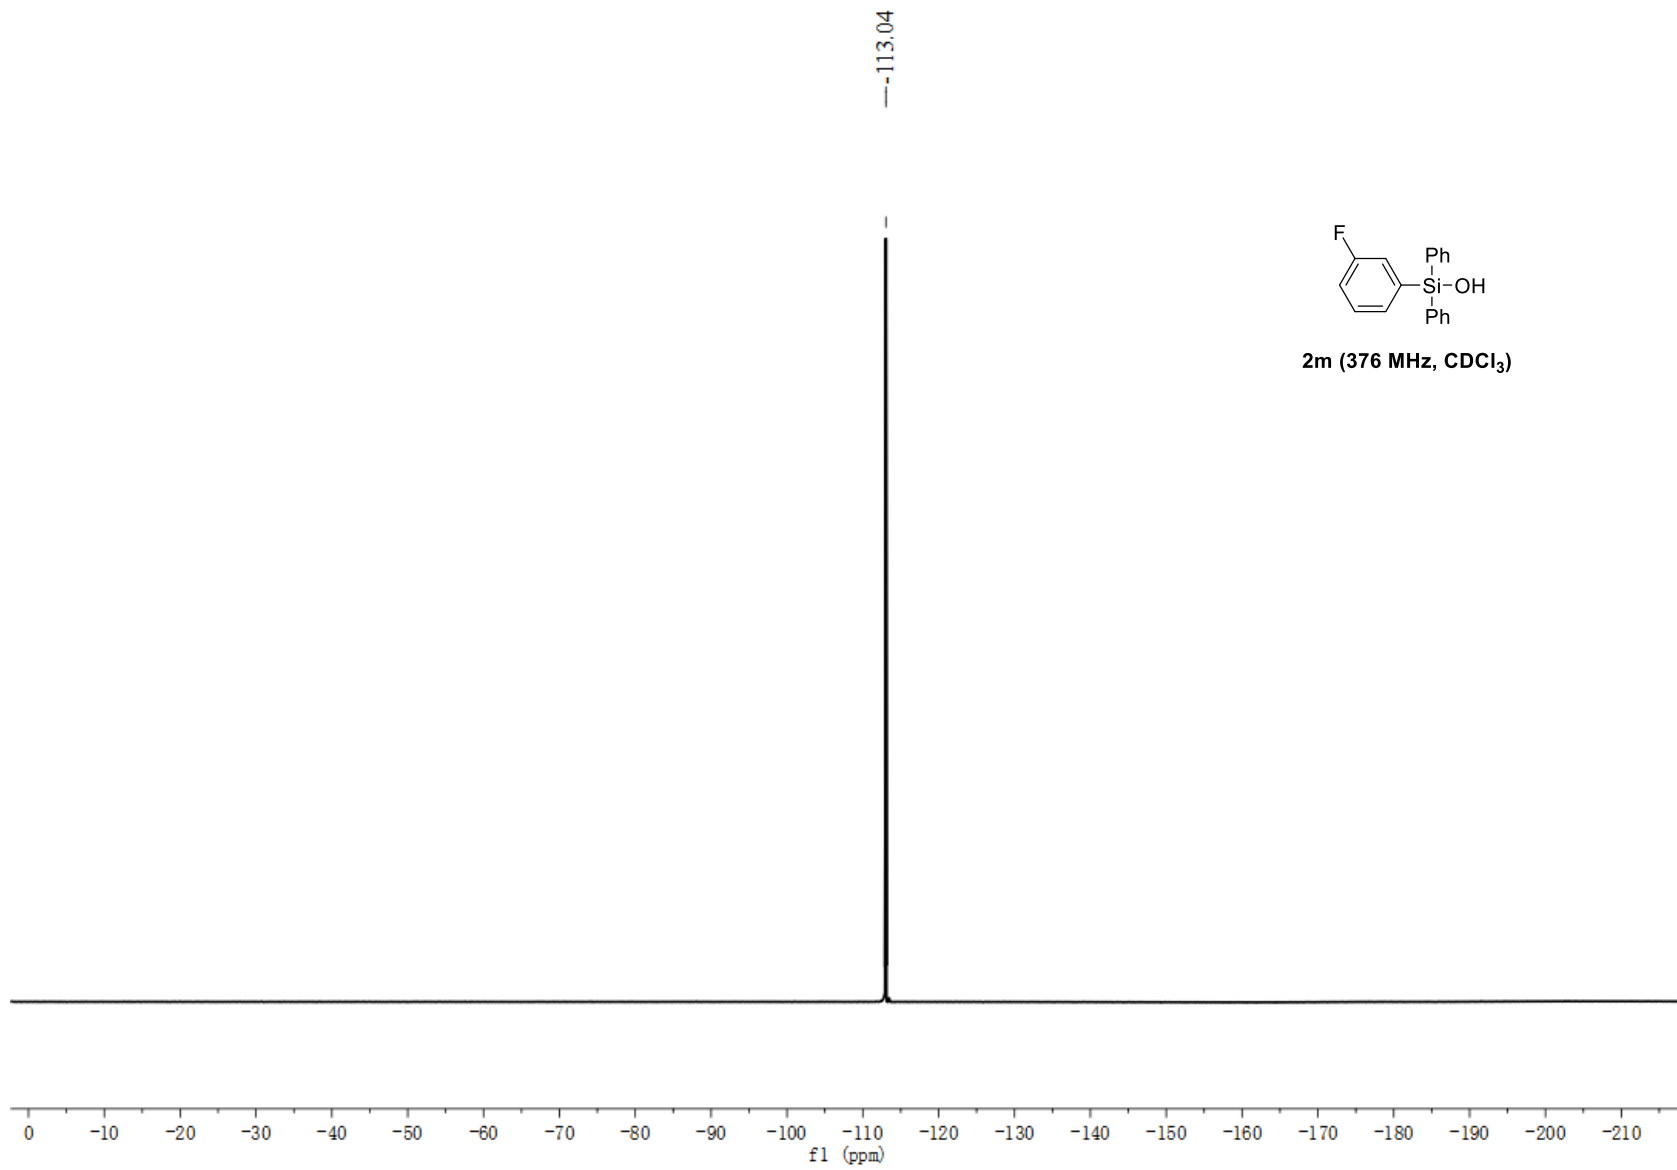



7.582  
7.578  
7.575  
7.569  
7.566  
7.415  
7.408  
7.351  
7.335  
7.184  
7.167  
7.161  
7.133

2.649  
2.301

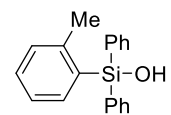

2n (400 MHz, CDCl<sub>3</sub>)

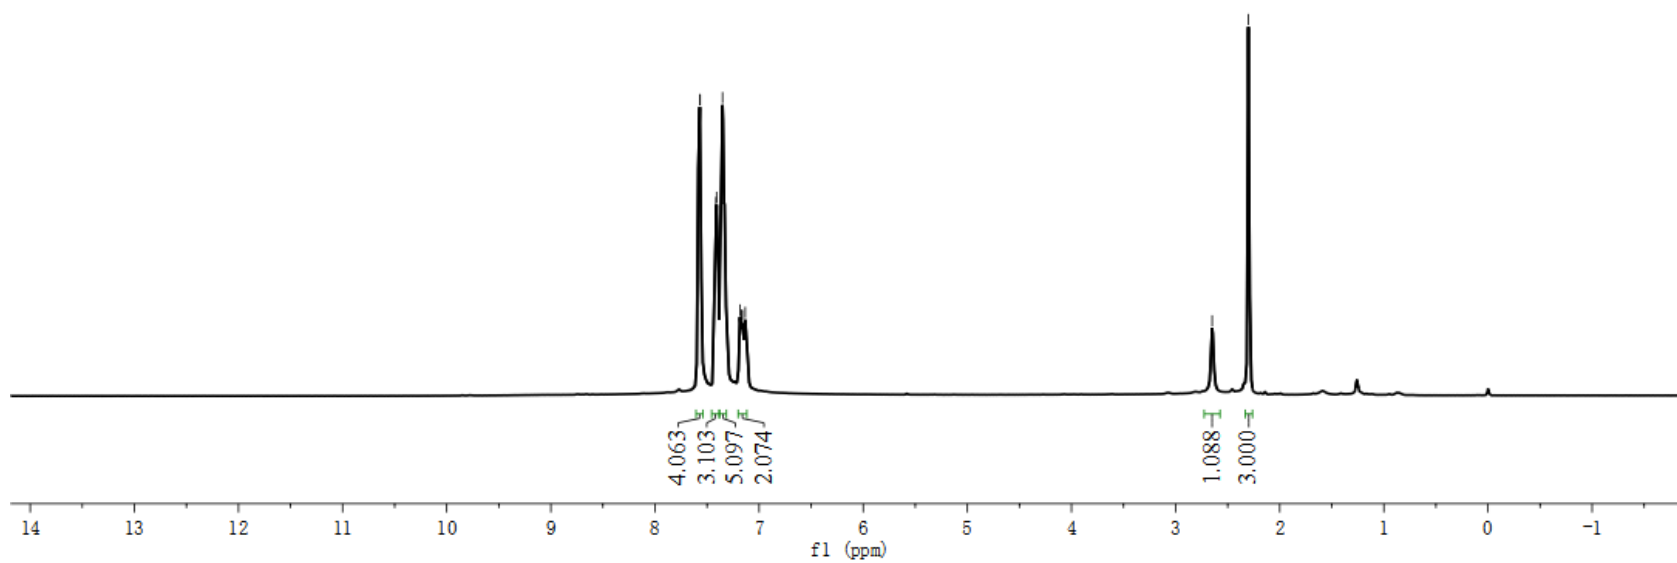

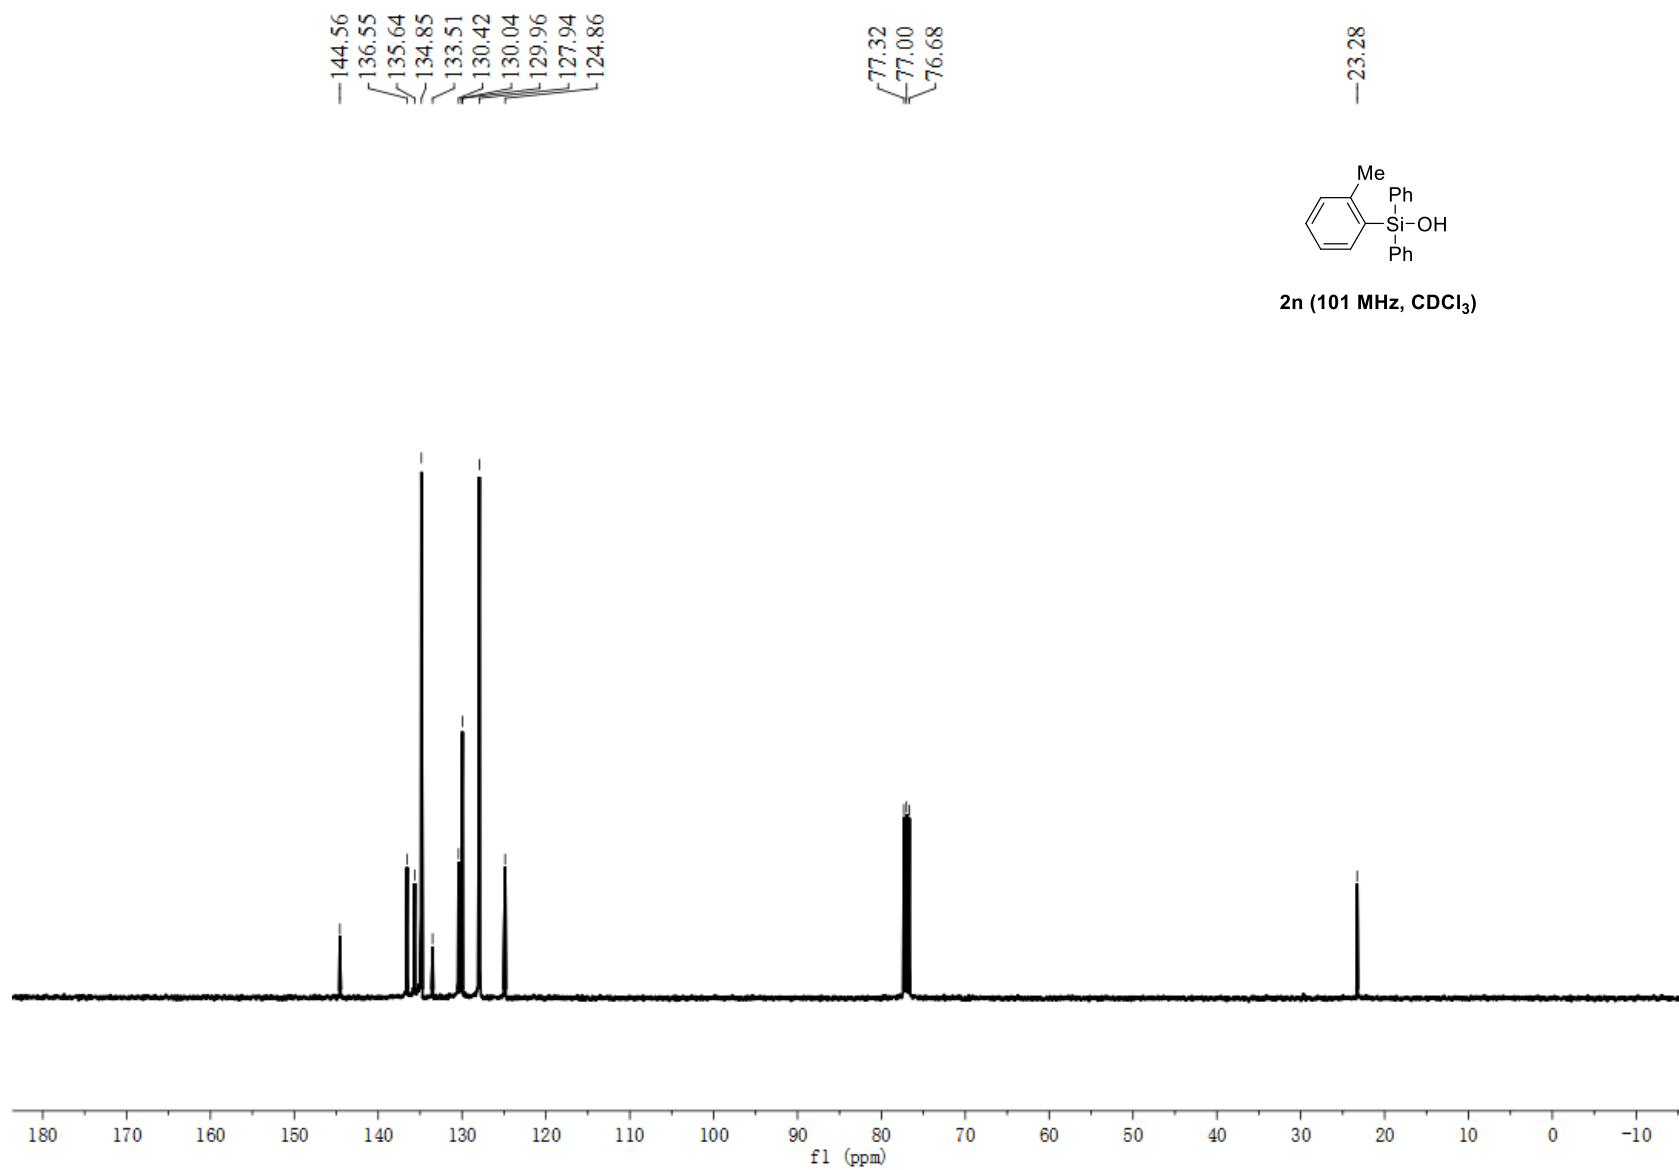

7.495  
7.476  
7.464  
7.447  
7.420  
7.401  
7.383  
7.349  
7.330  
7.313  
7.273  
7.252  
7.250  
7.227  
7.209  
7.172  
7.154

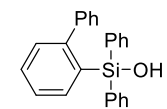

2o (400 MHz, CDCl<sub>3</sub>)

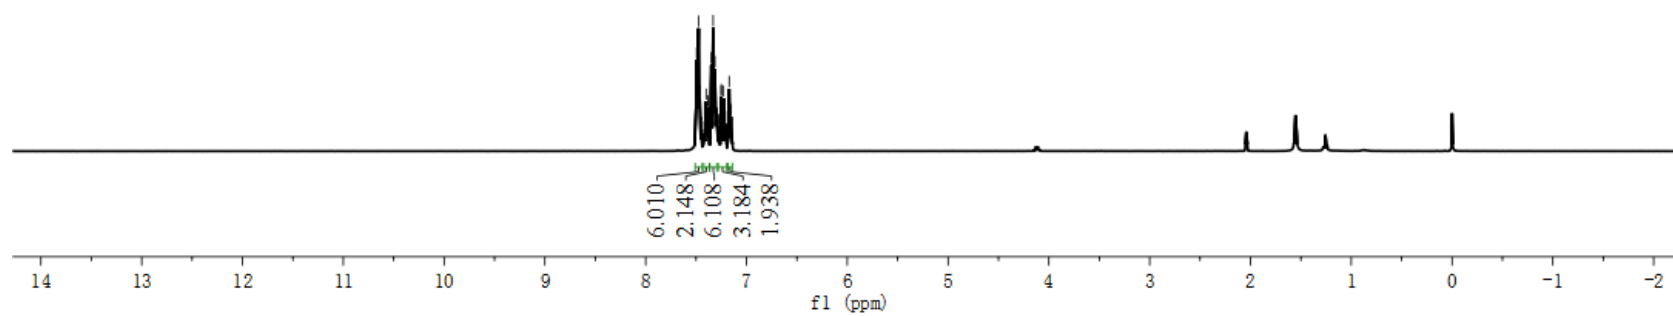

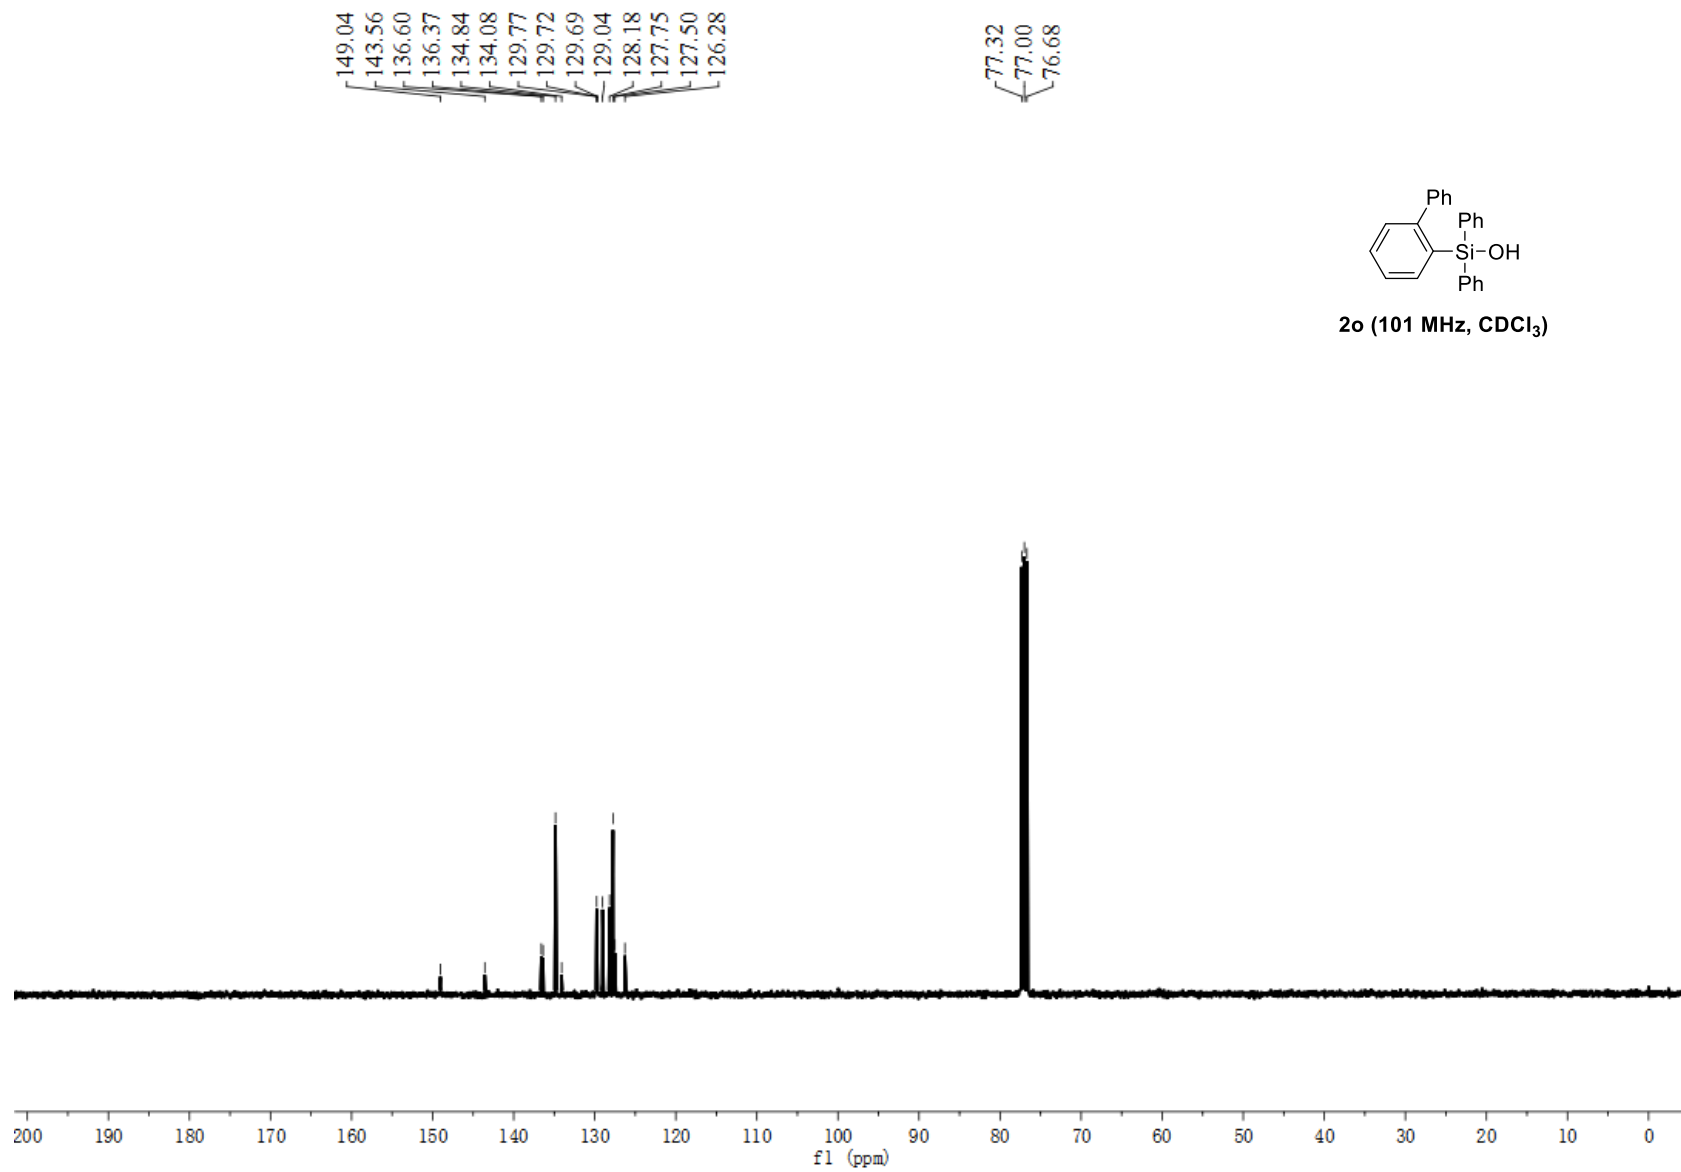

**2o** (101 MHz, CDCl<sub>3</sub>)

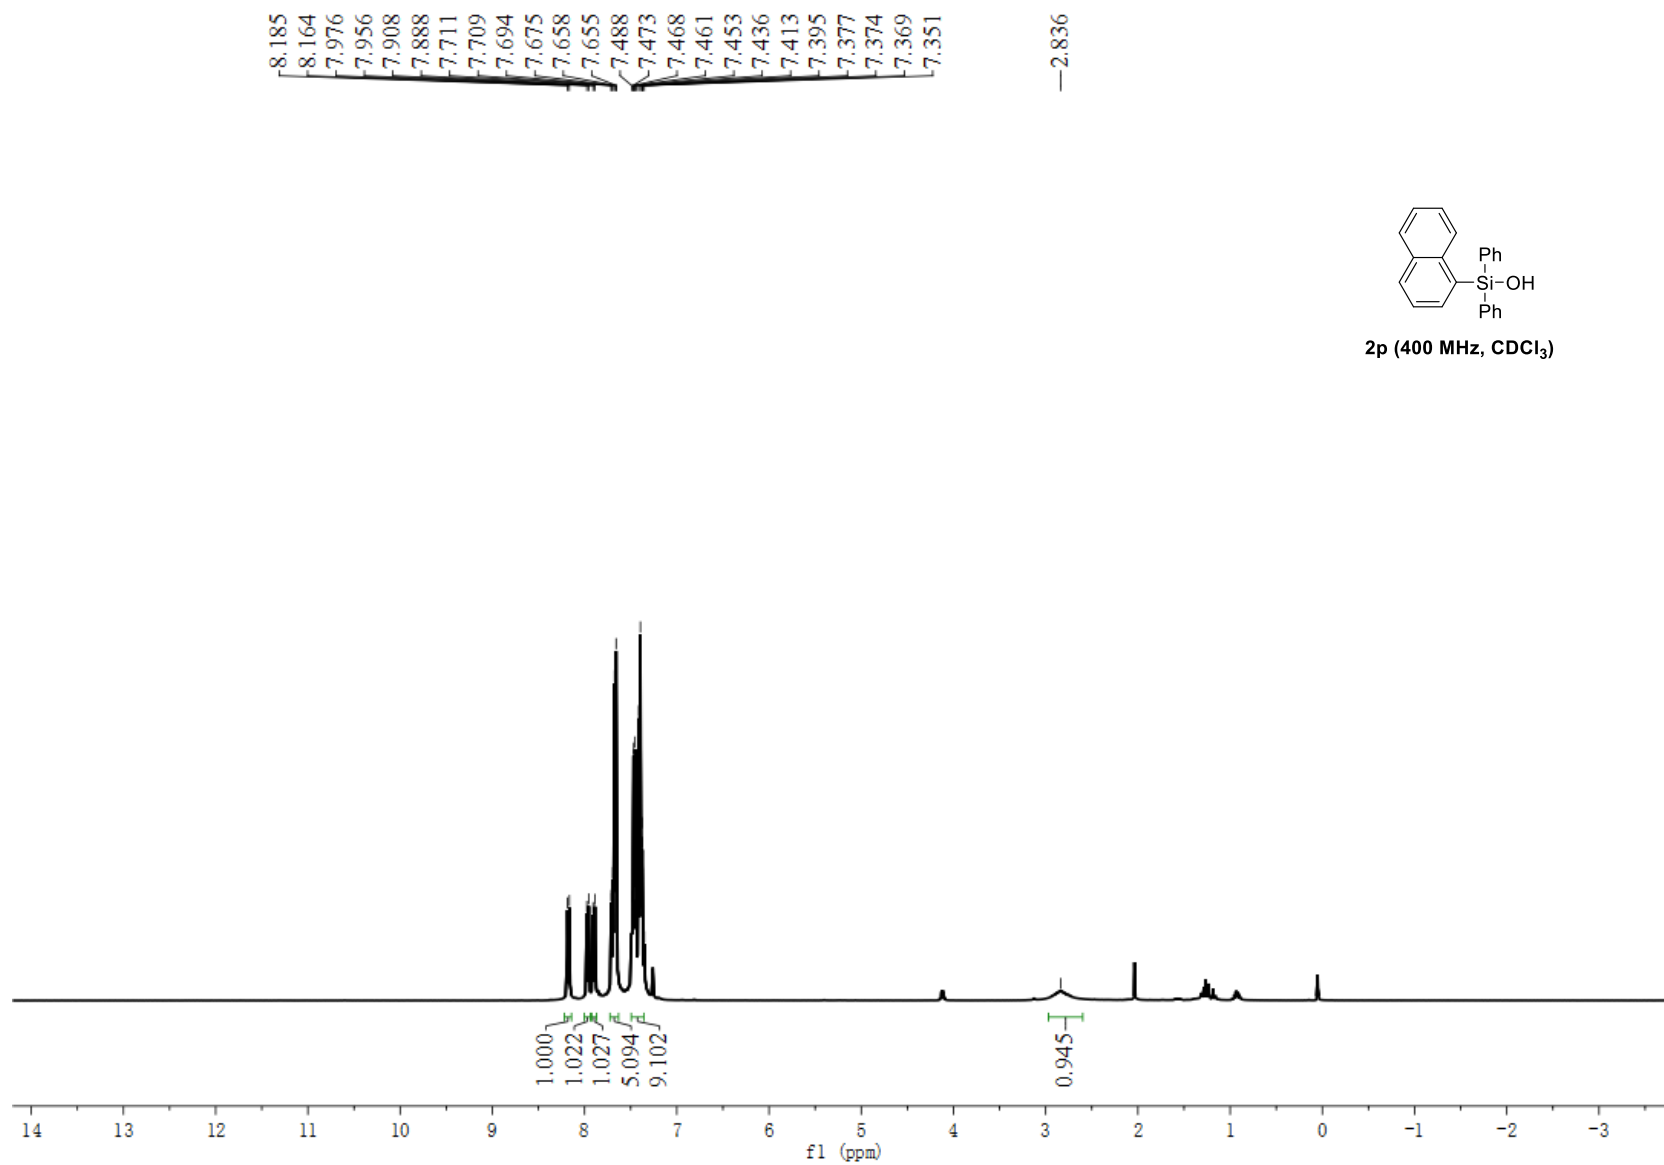

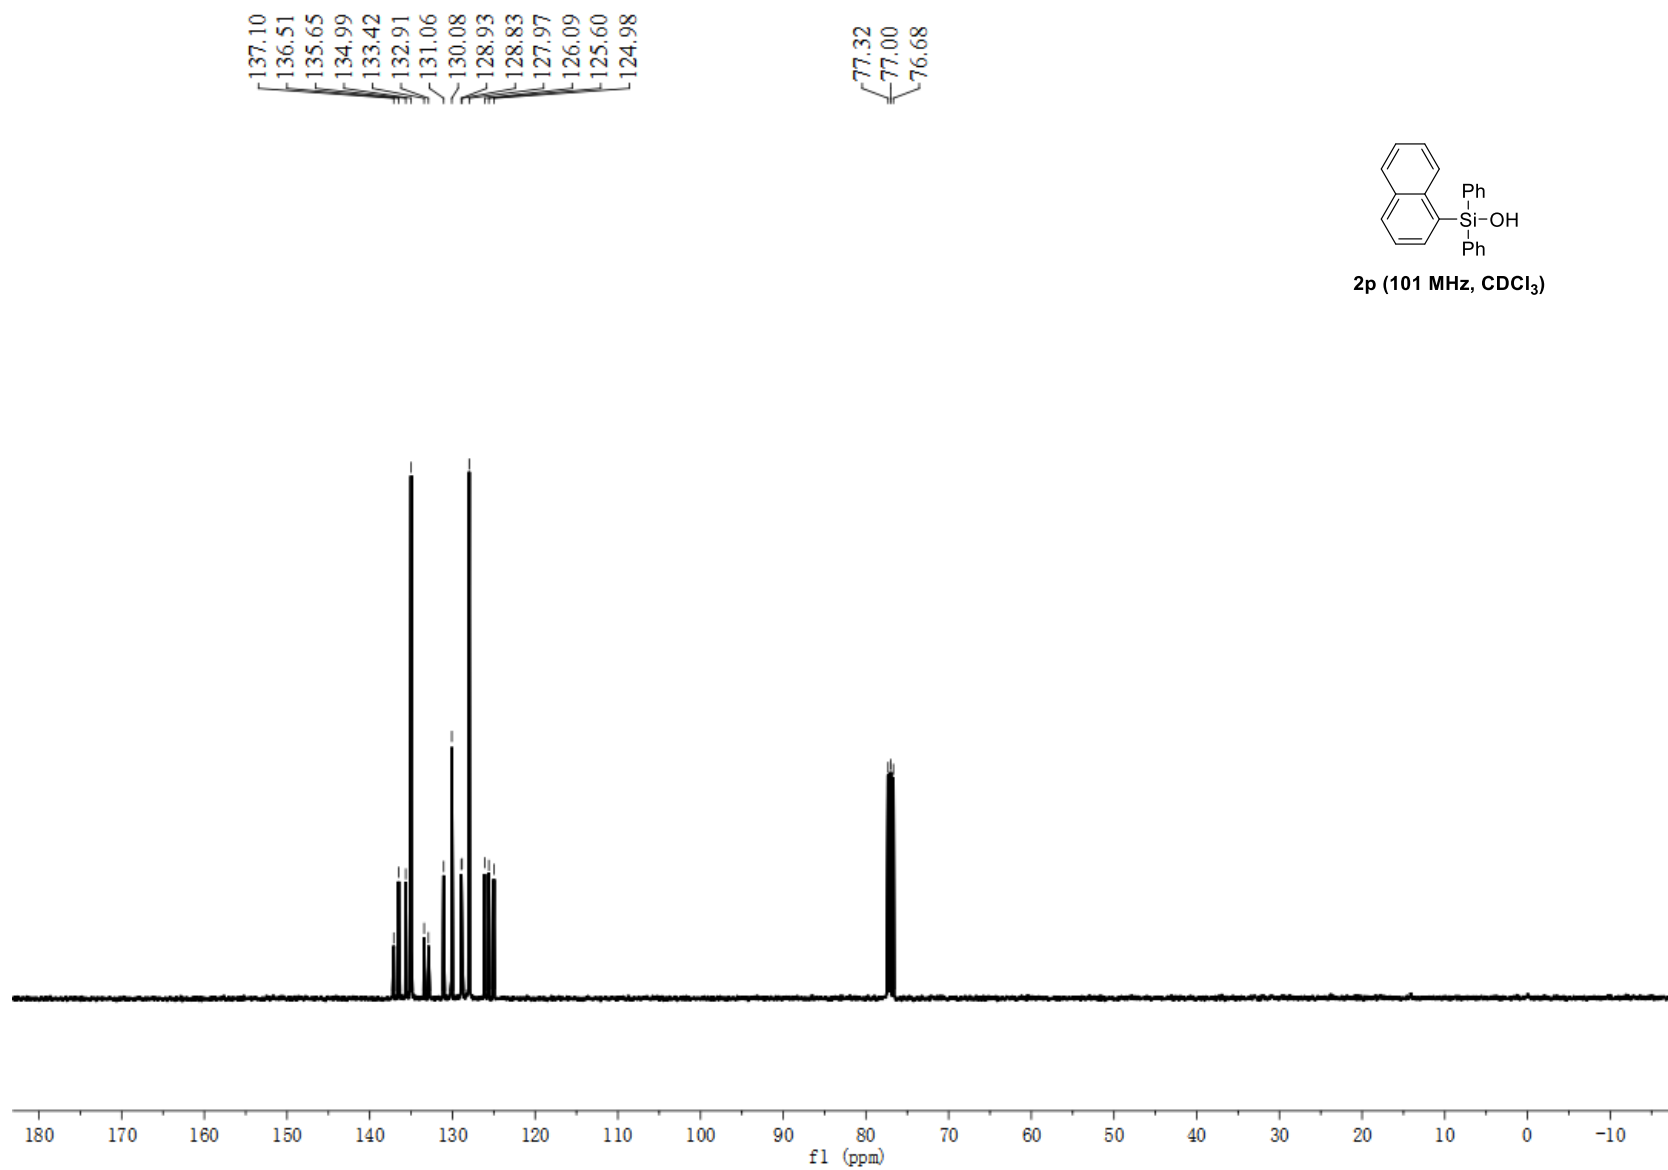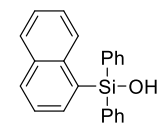

2p (101 MHz, CDCl<sub>3</sub>)

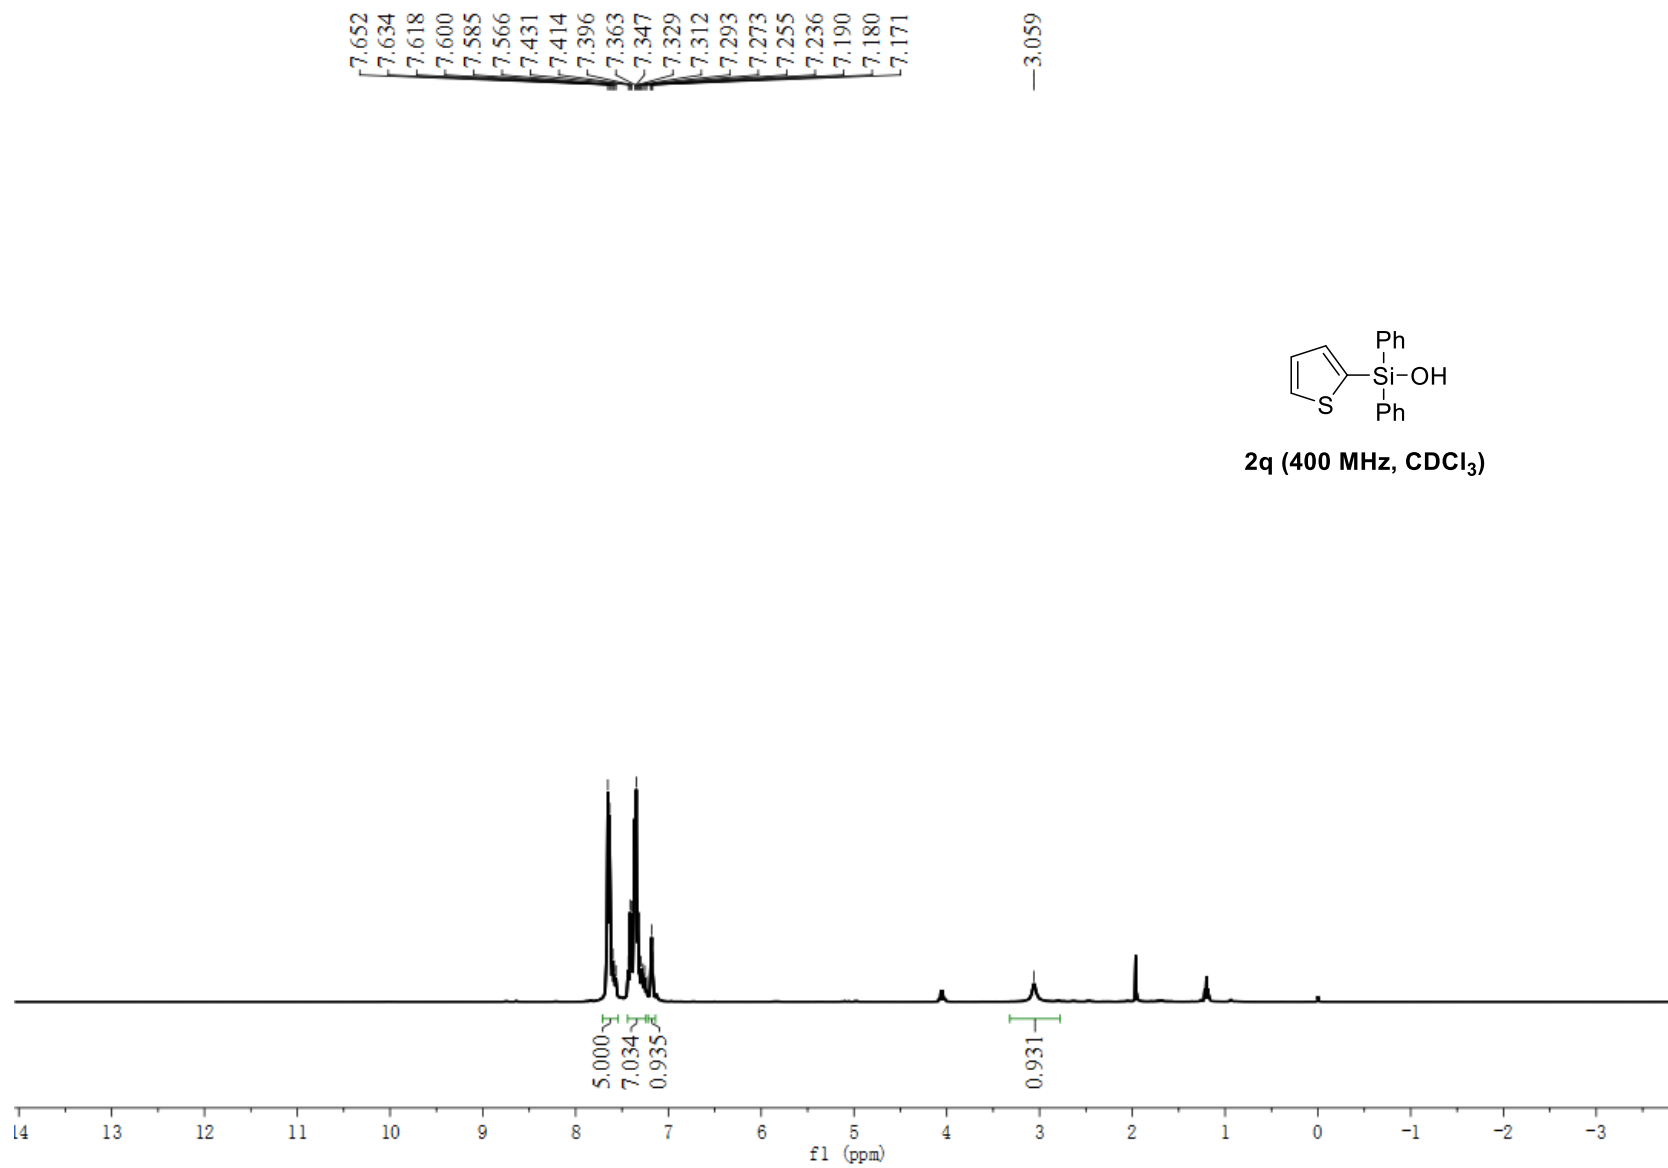

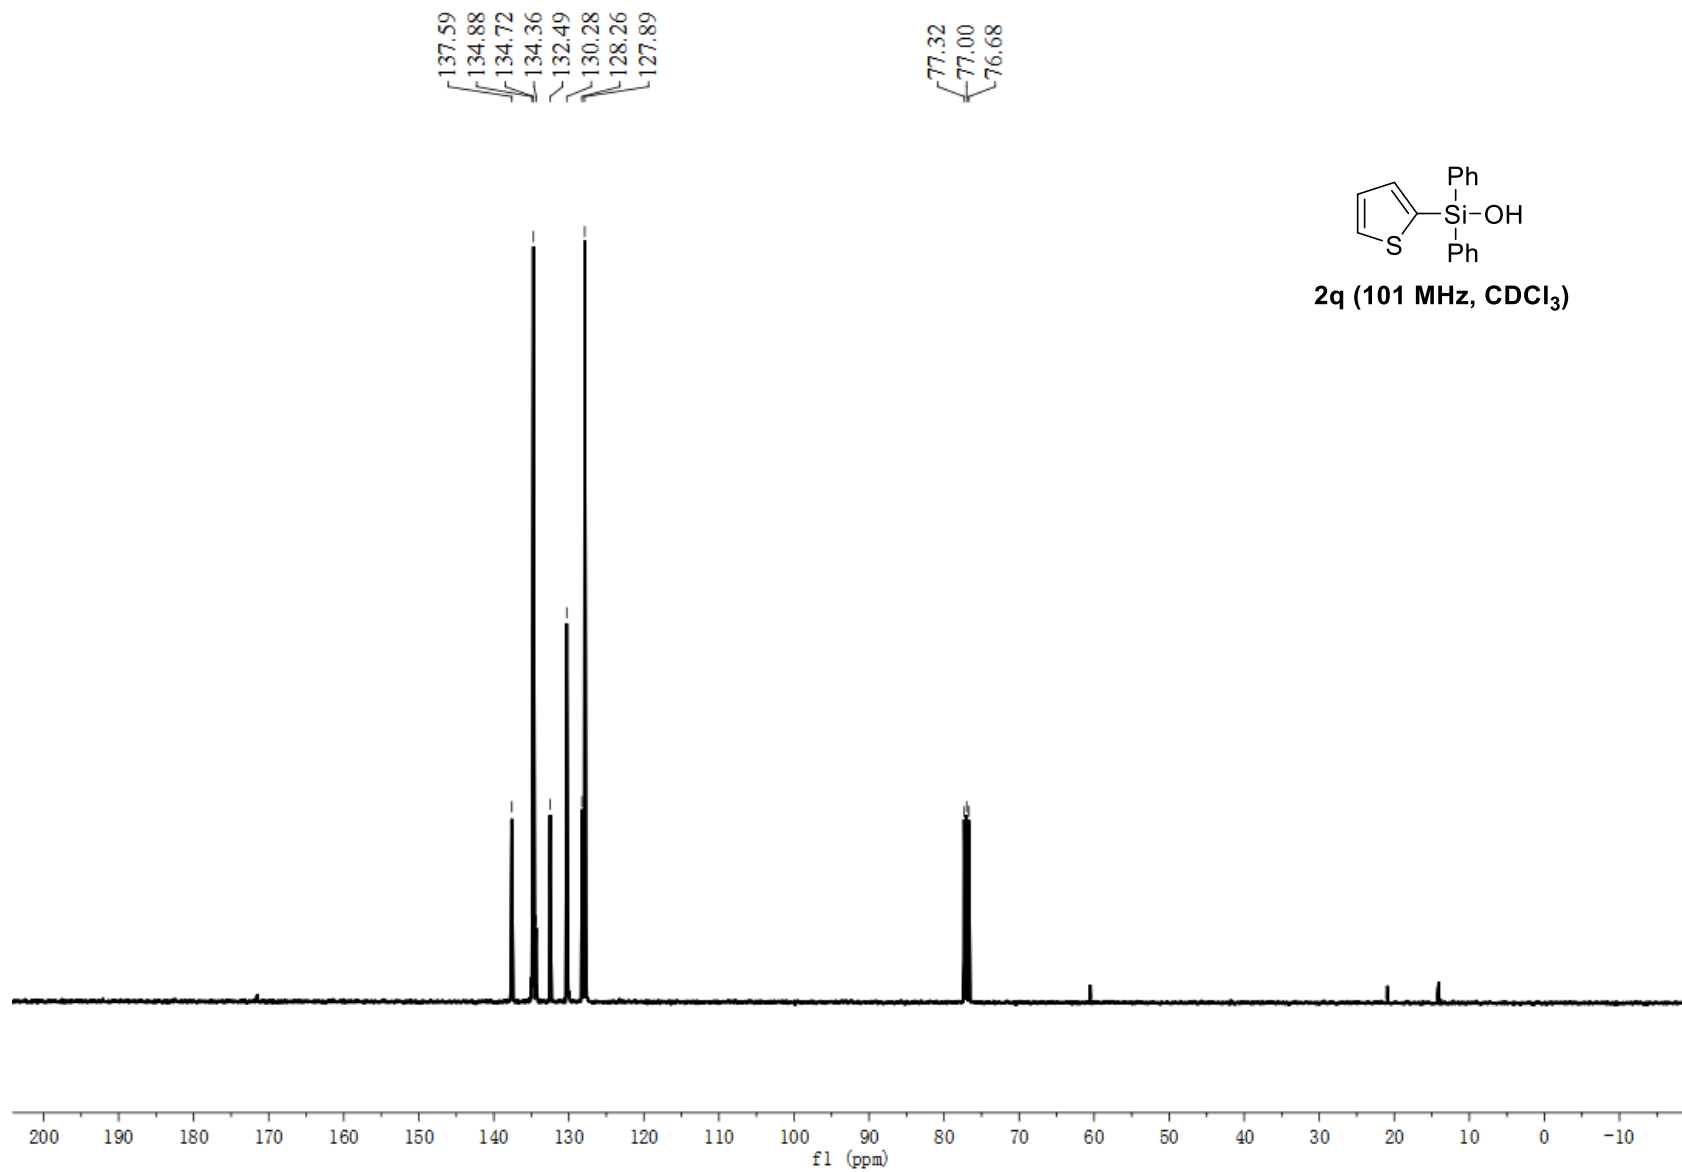



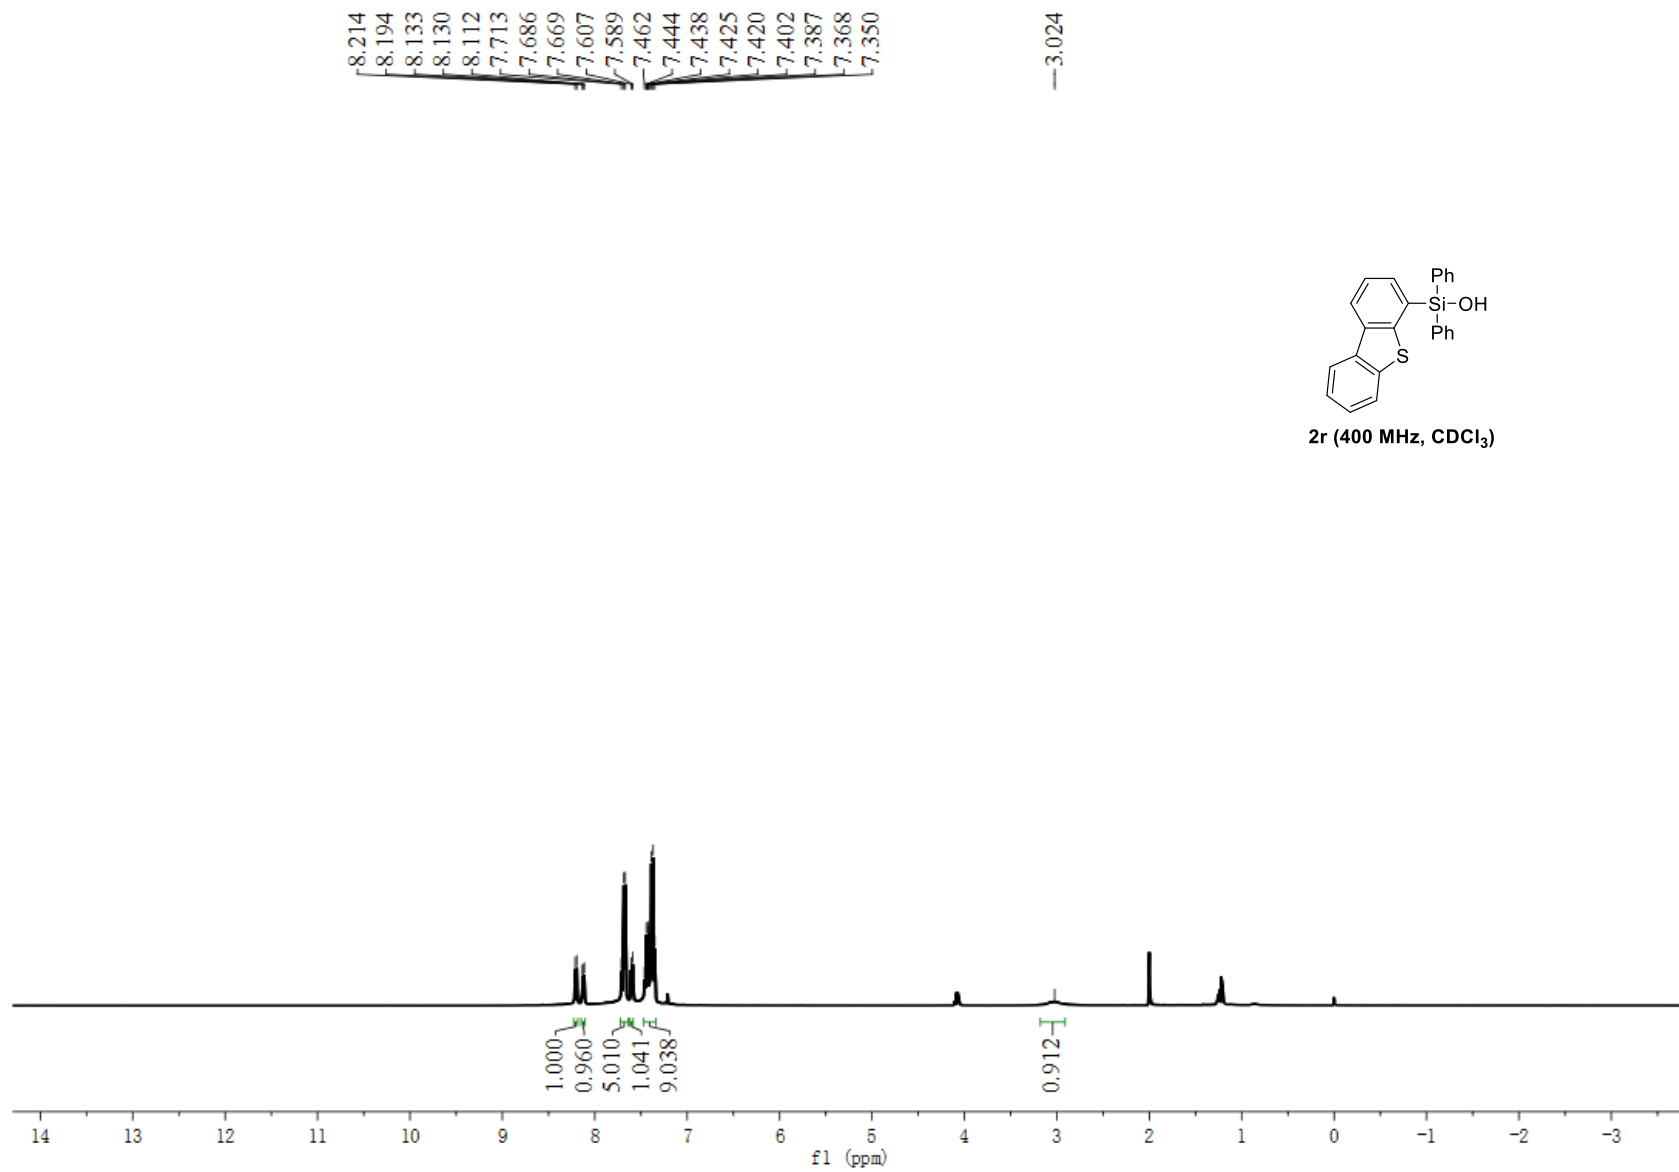

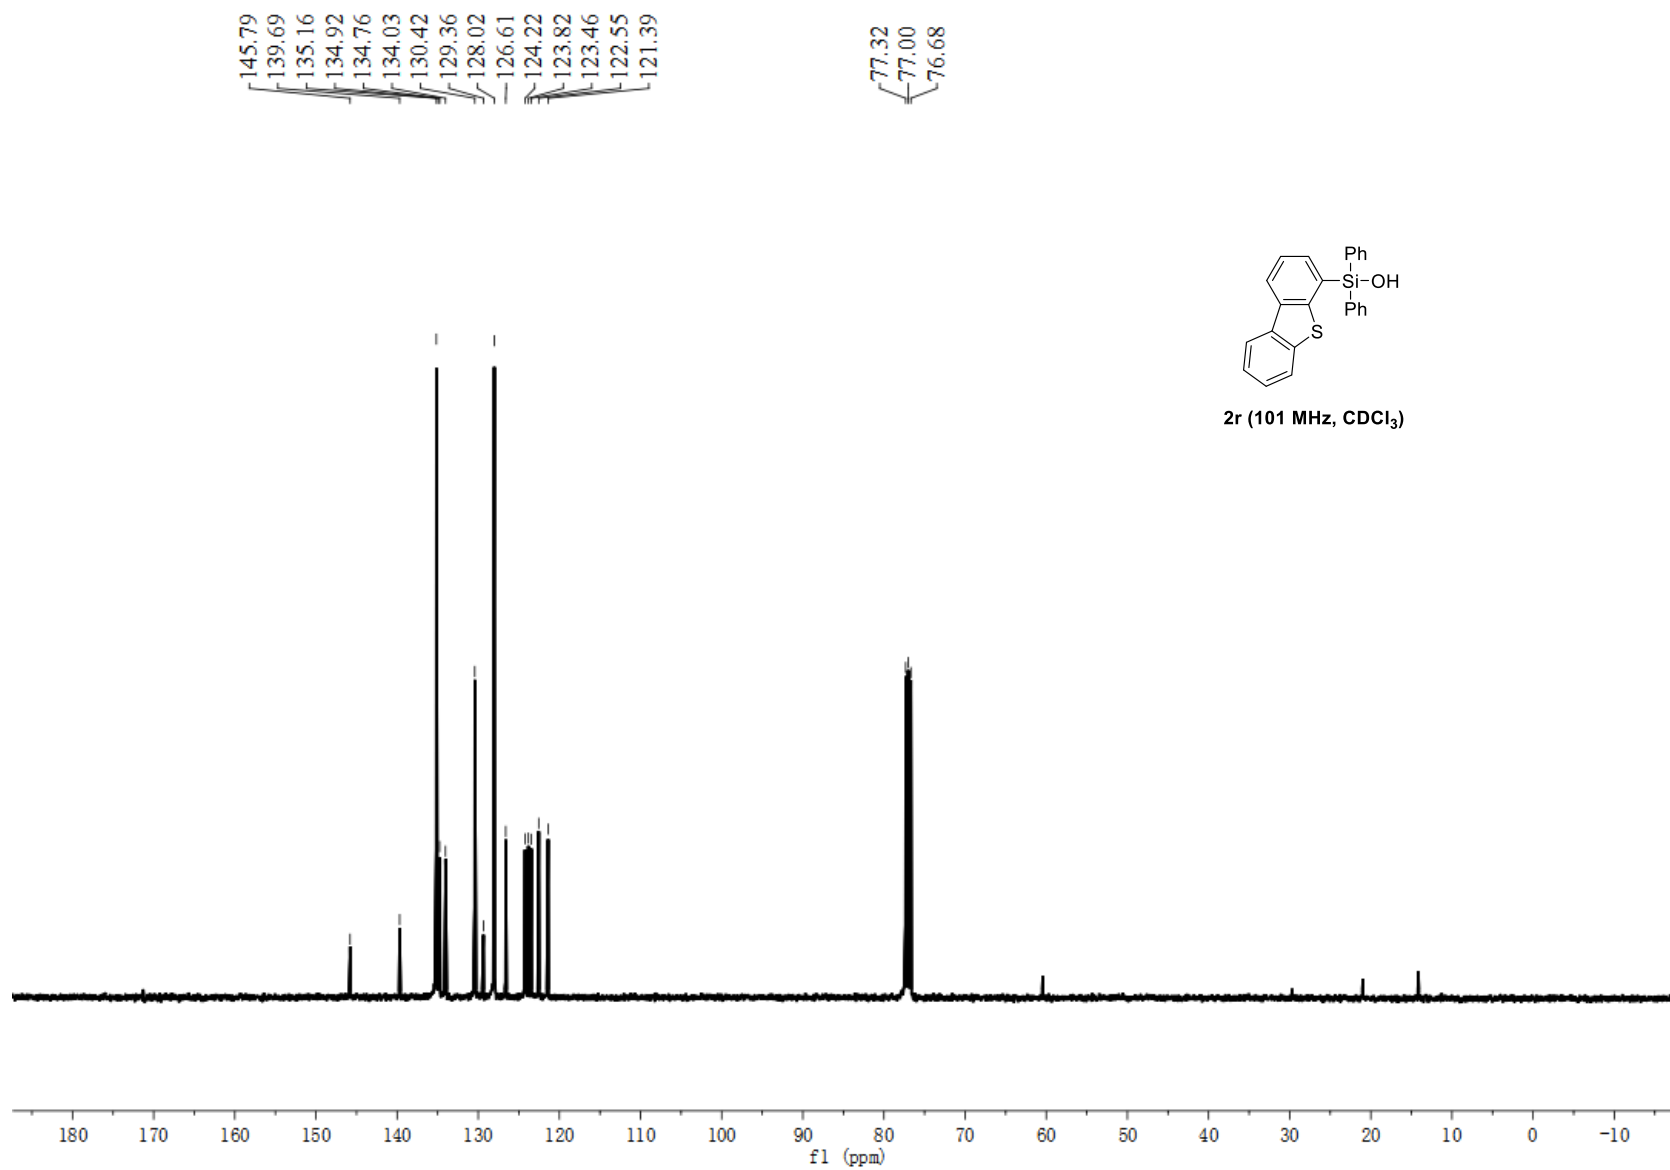

8.077  
8.058  
7.996  
7.977  
7.754  
7.734  
7.543  
7.525  
7.502  
7.481  
7.463  
7.444  
7.434  
7.415  
7.399  
7.397  
7.390  
7.380  
7.371  
7.362  
7.353  
7.343

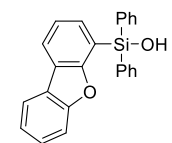

2s (400 MHz, CDCl<sub>3</sub>)

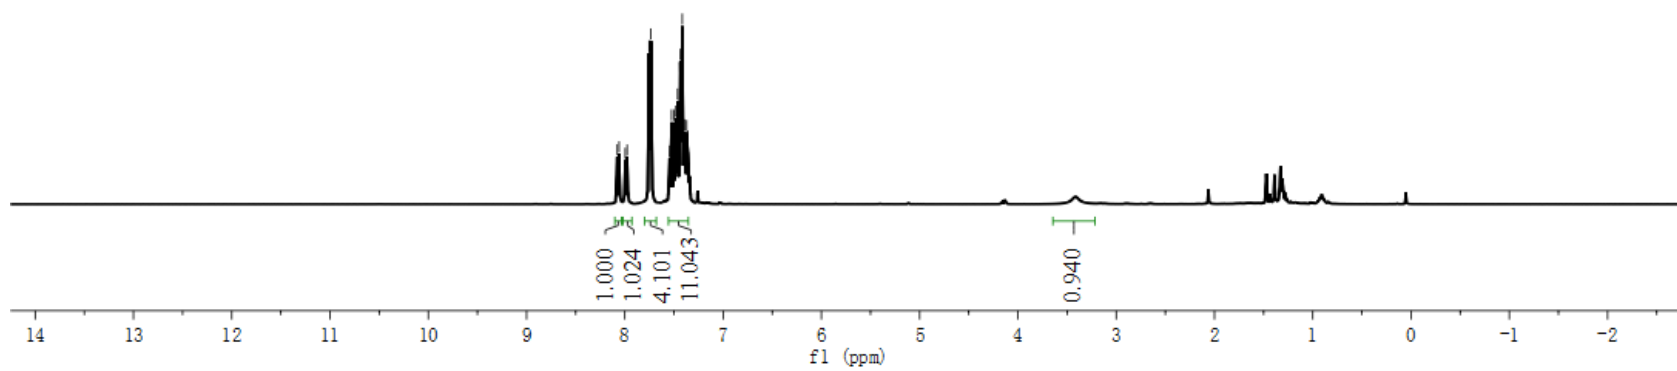

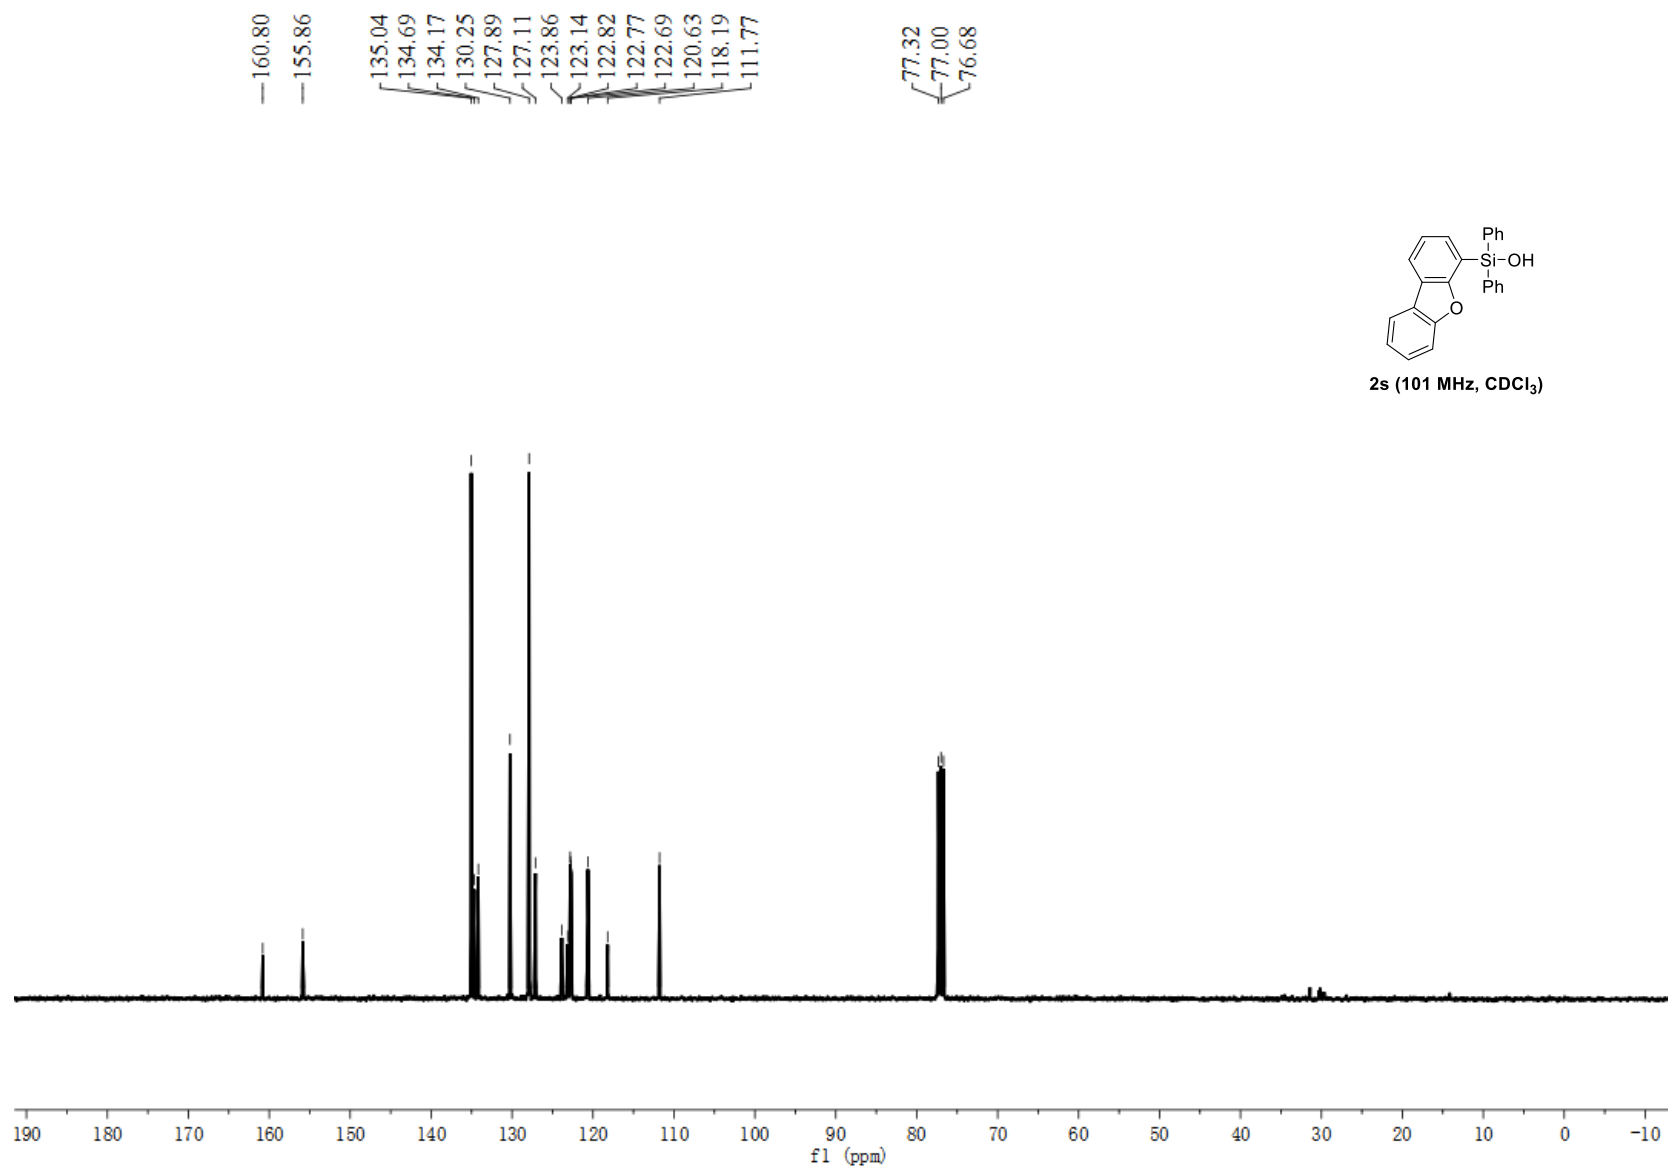

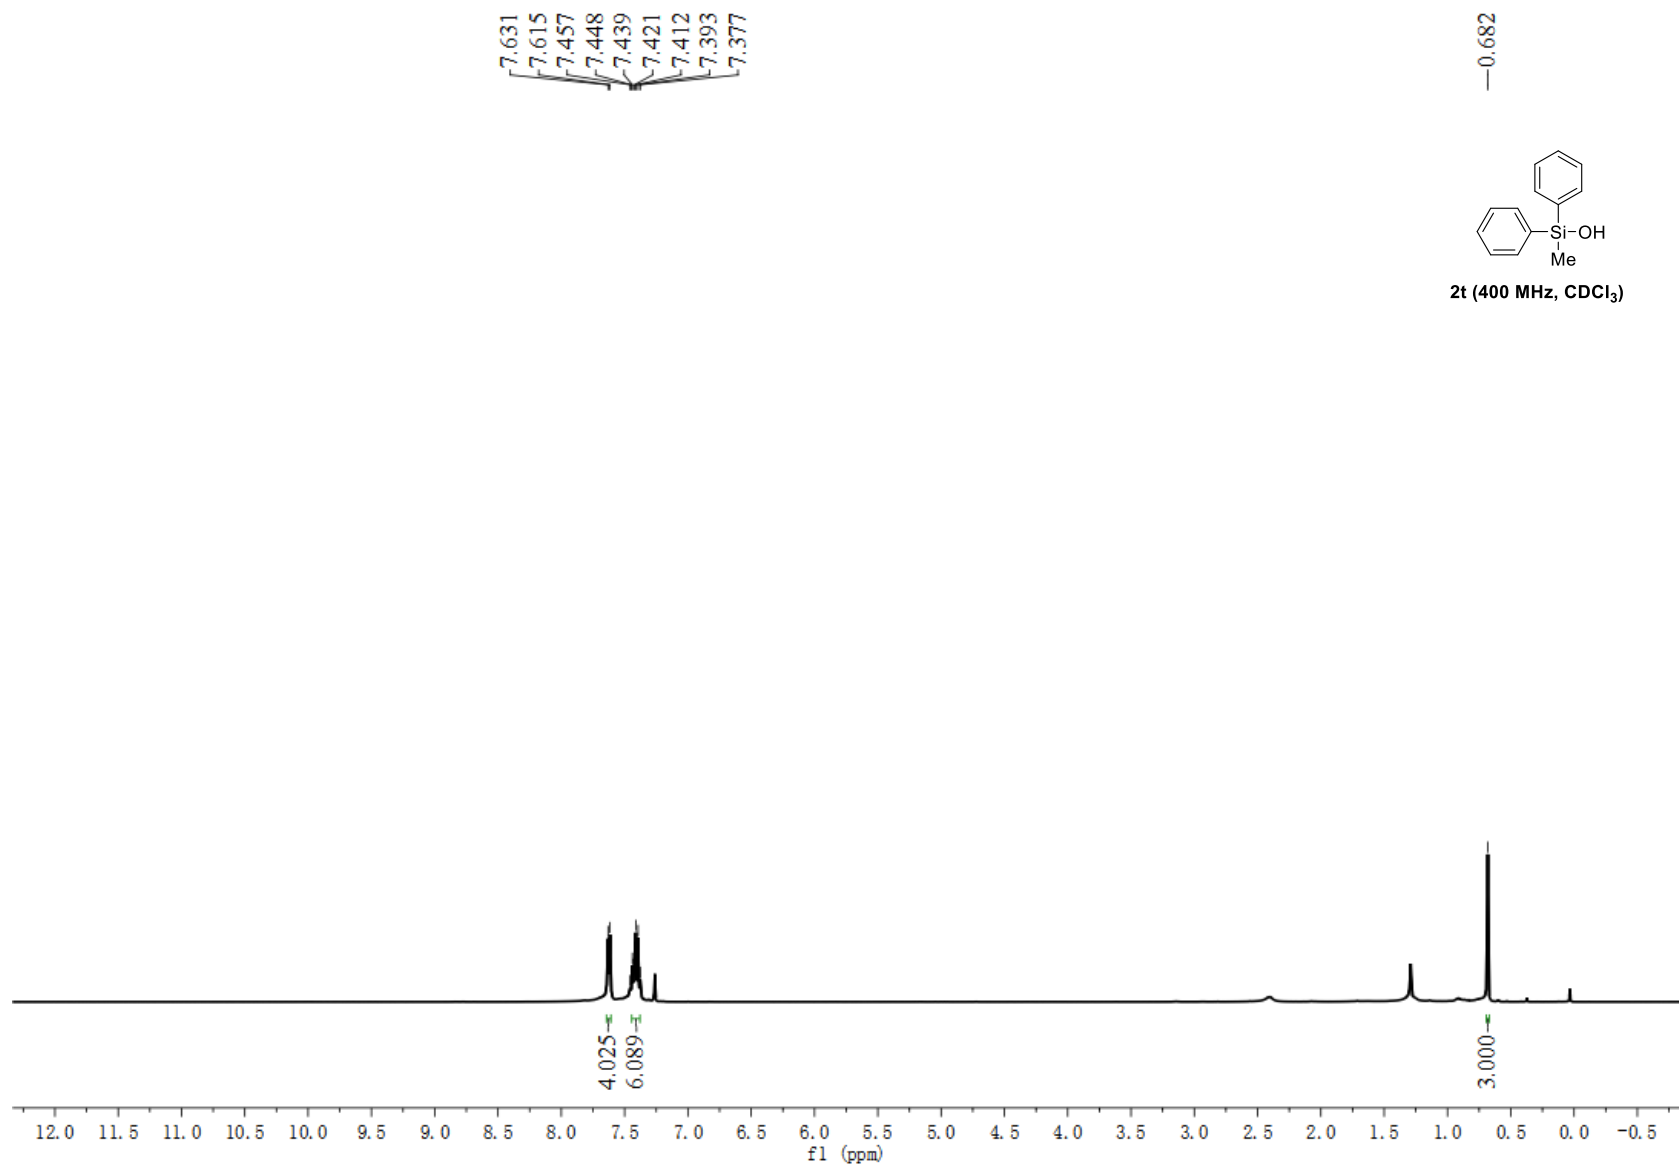

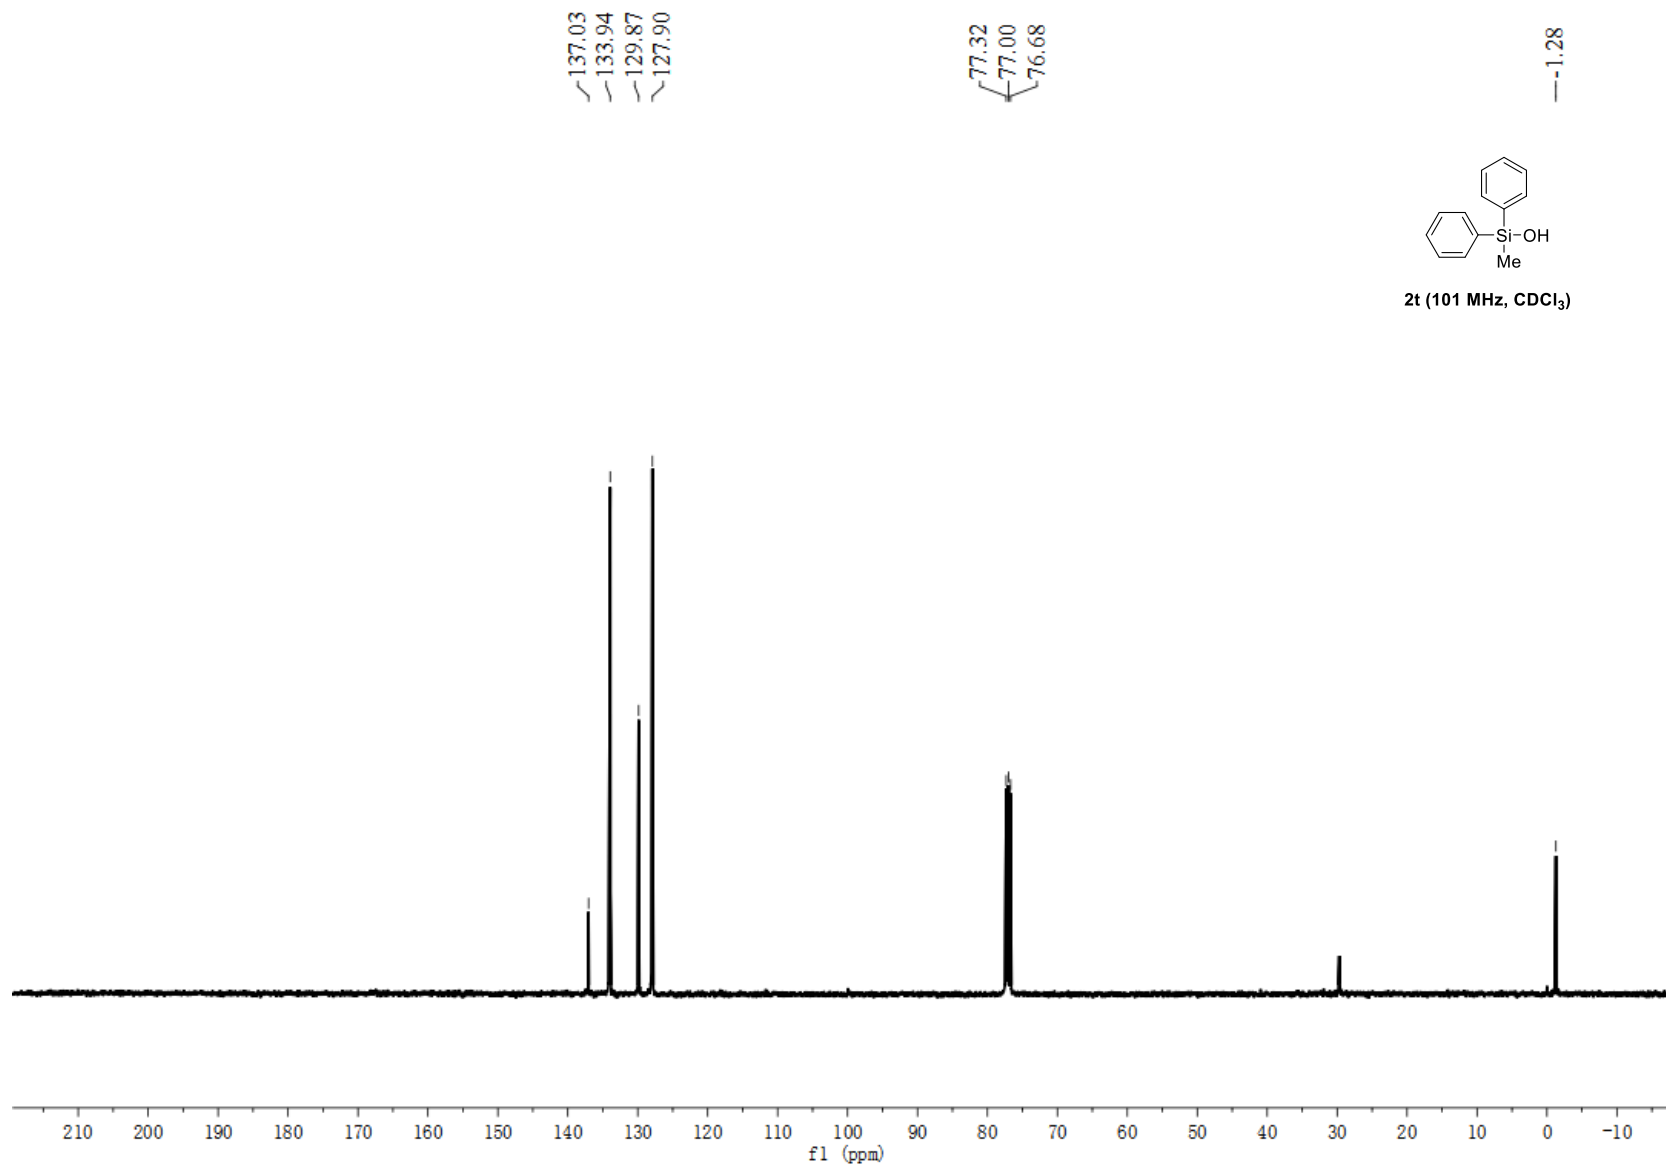

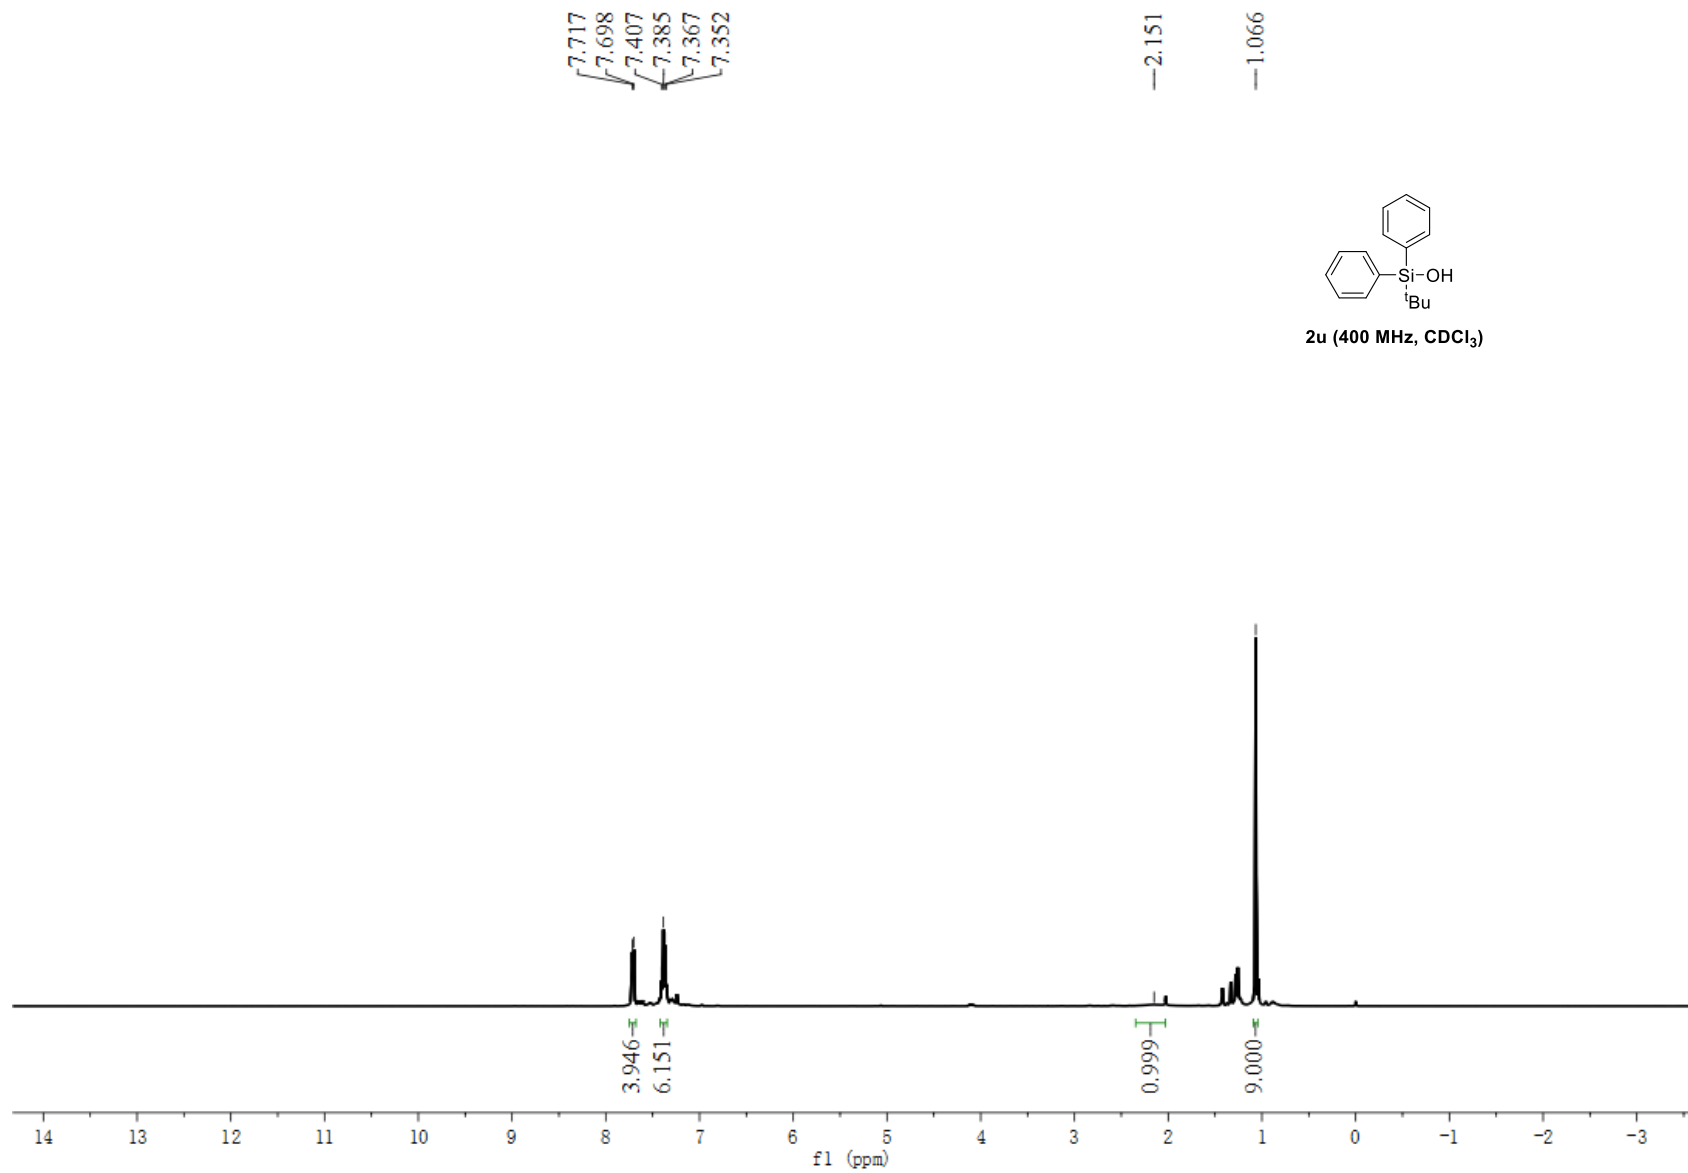

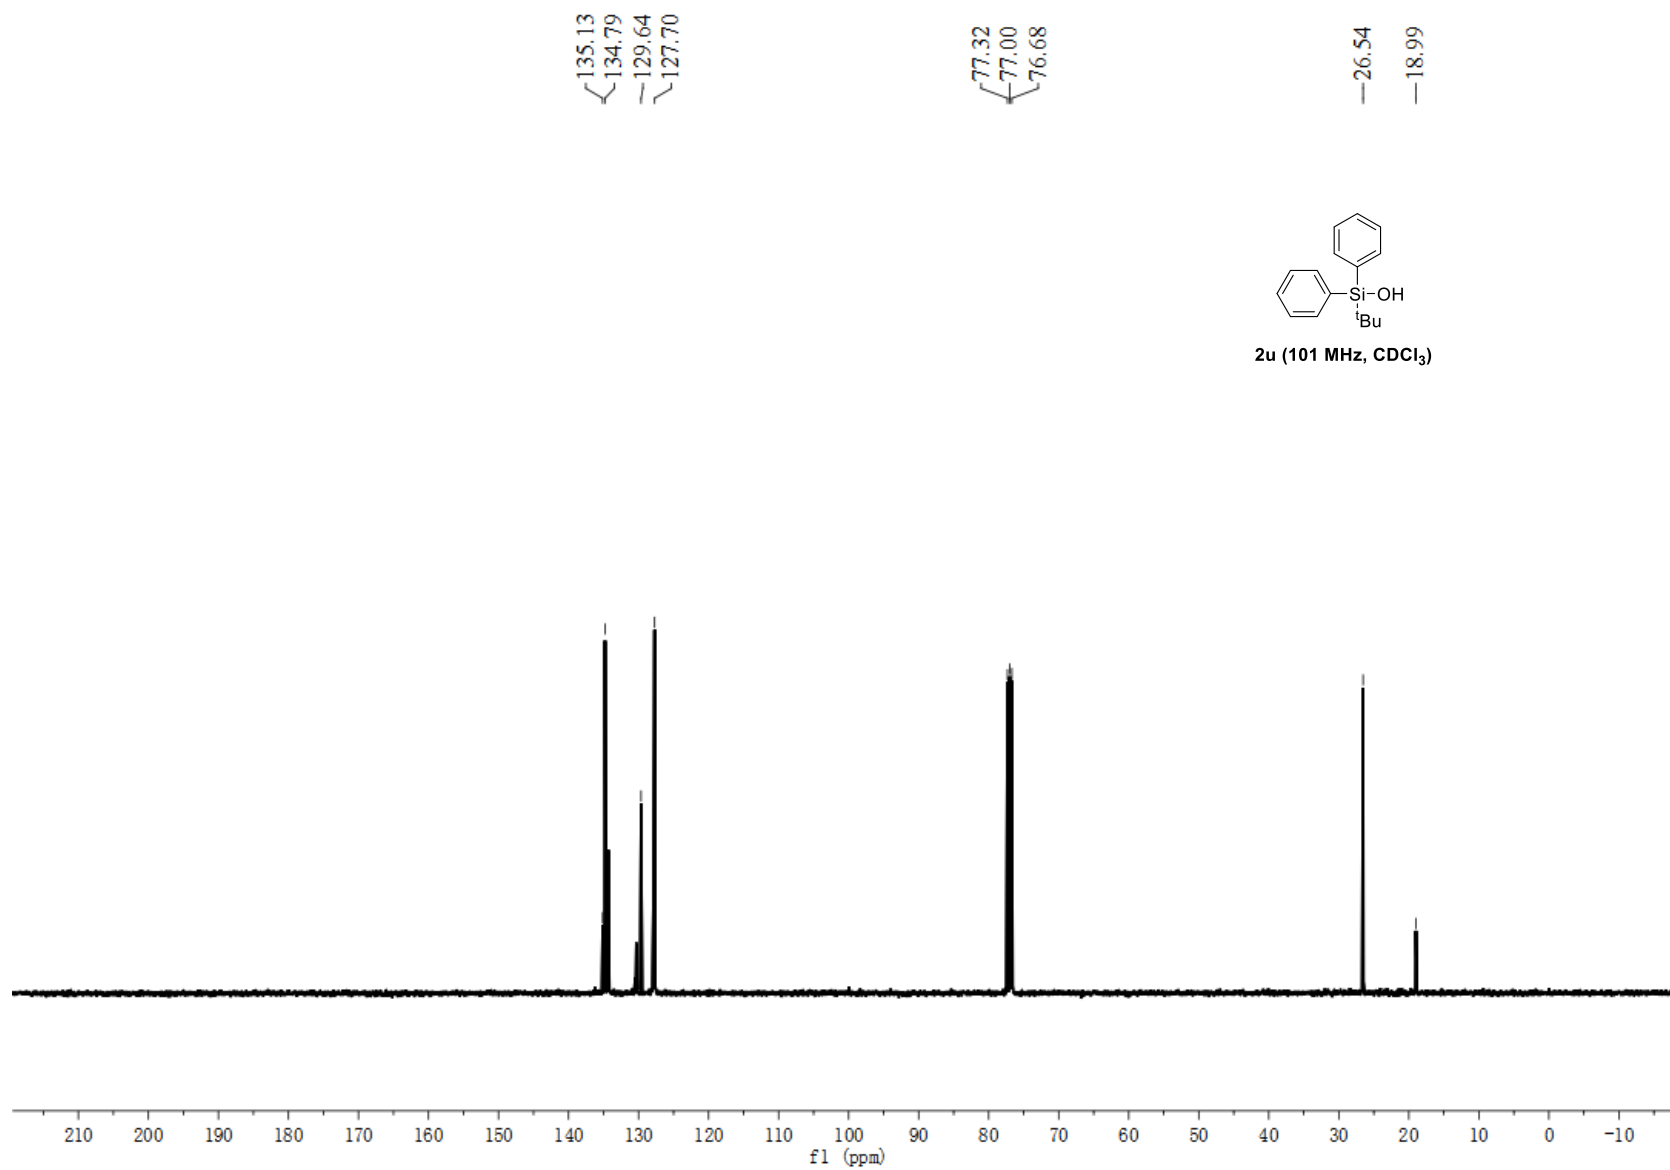



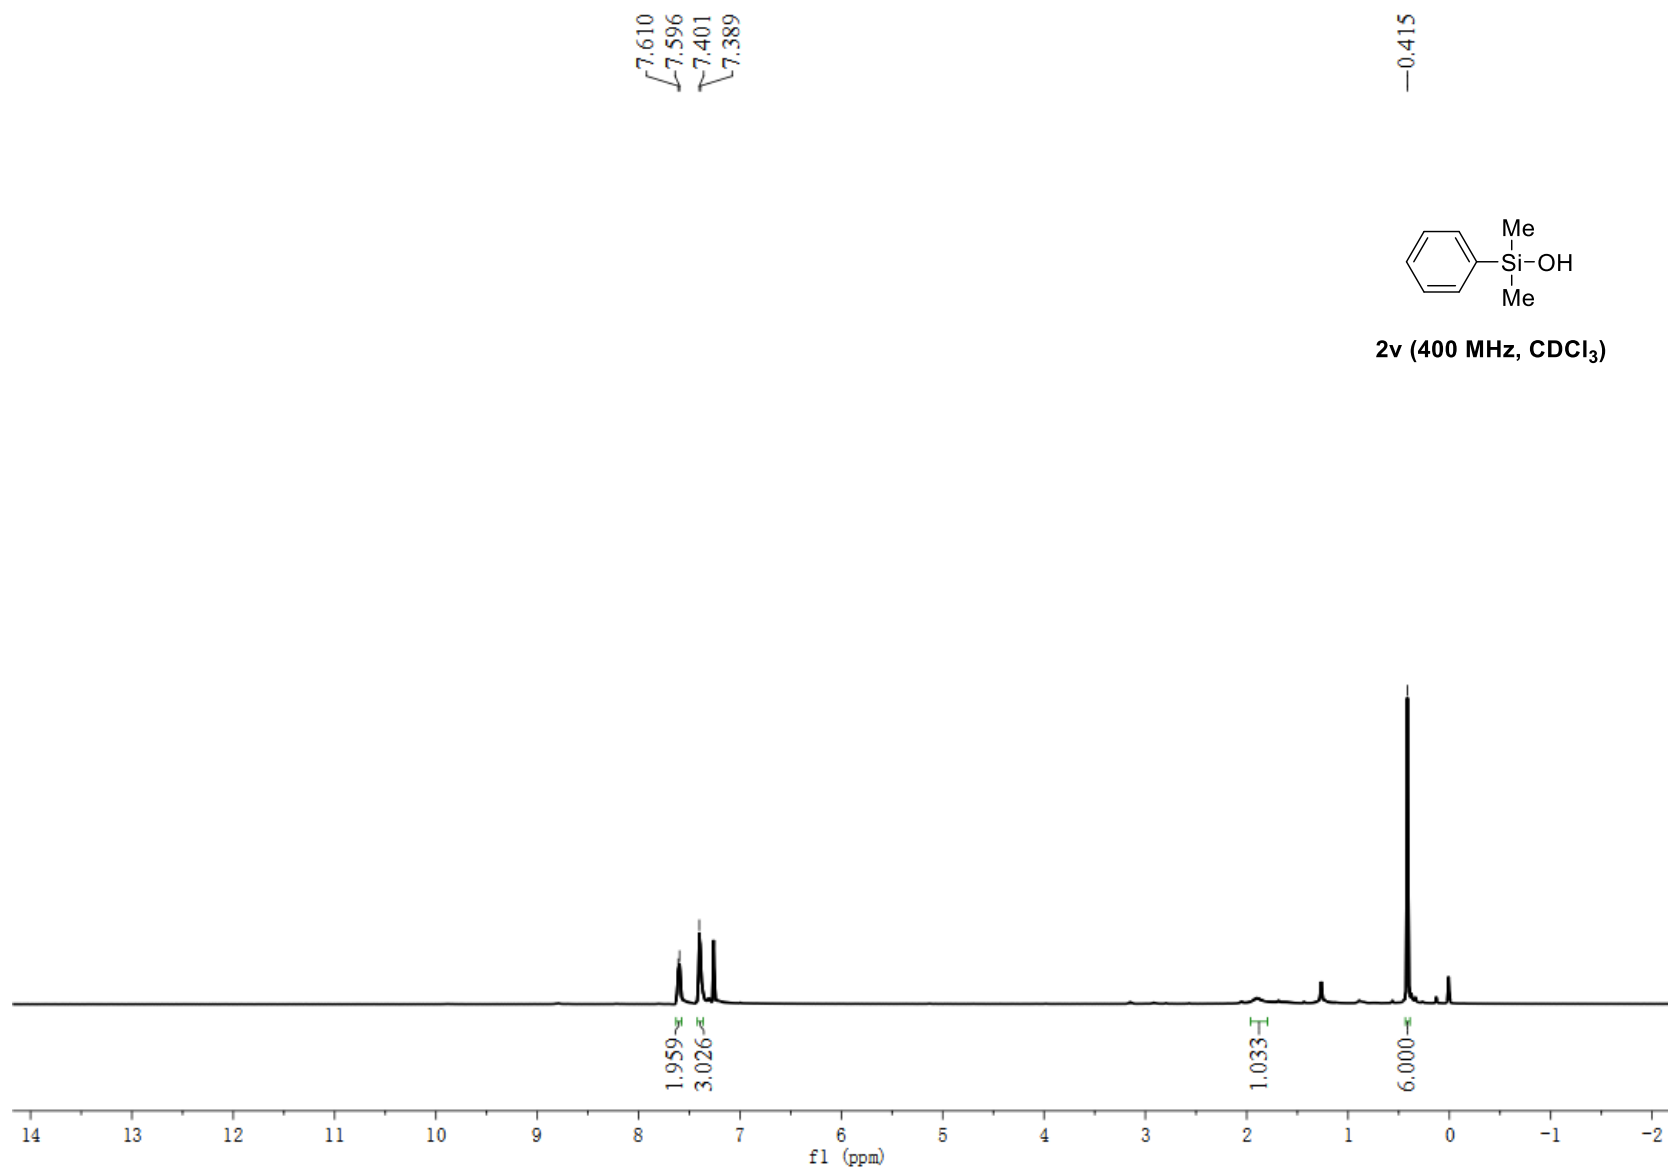

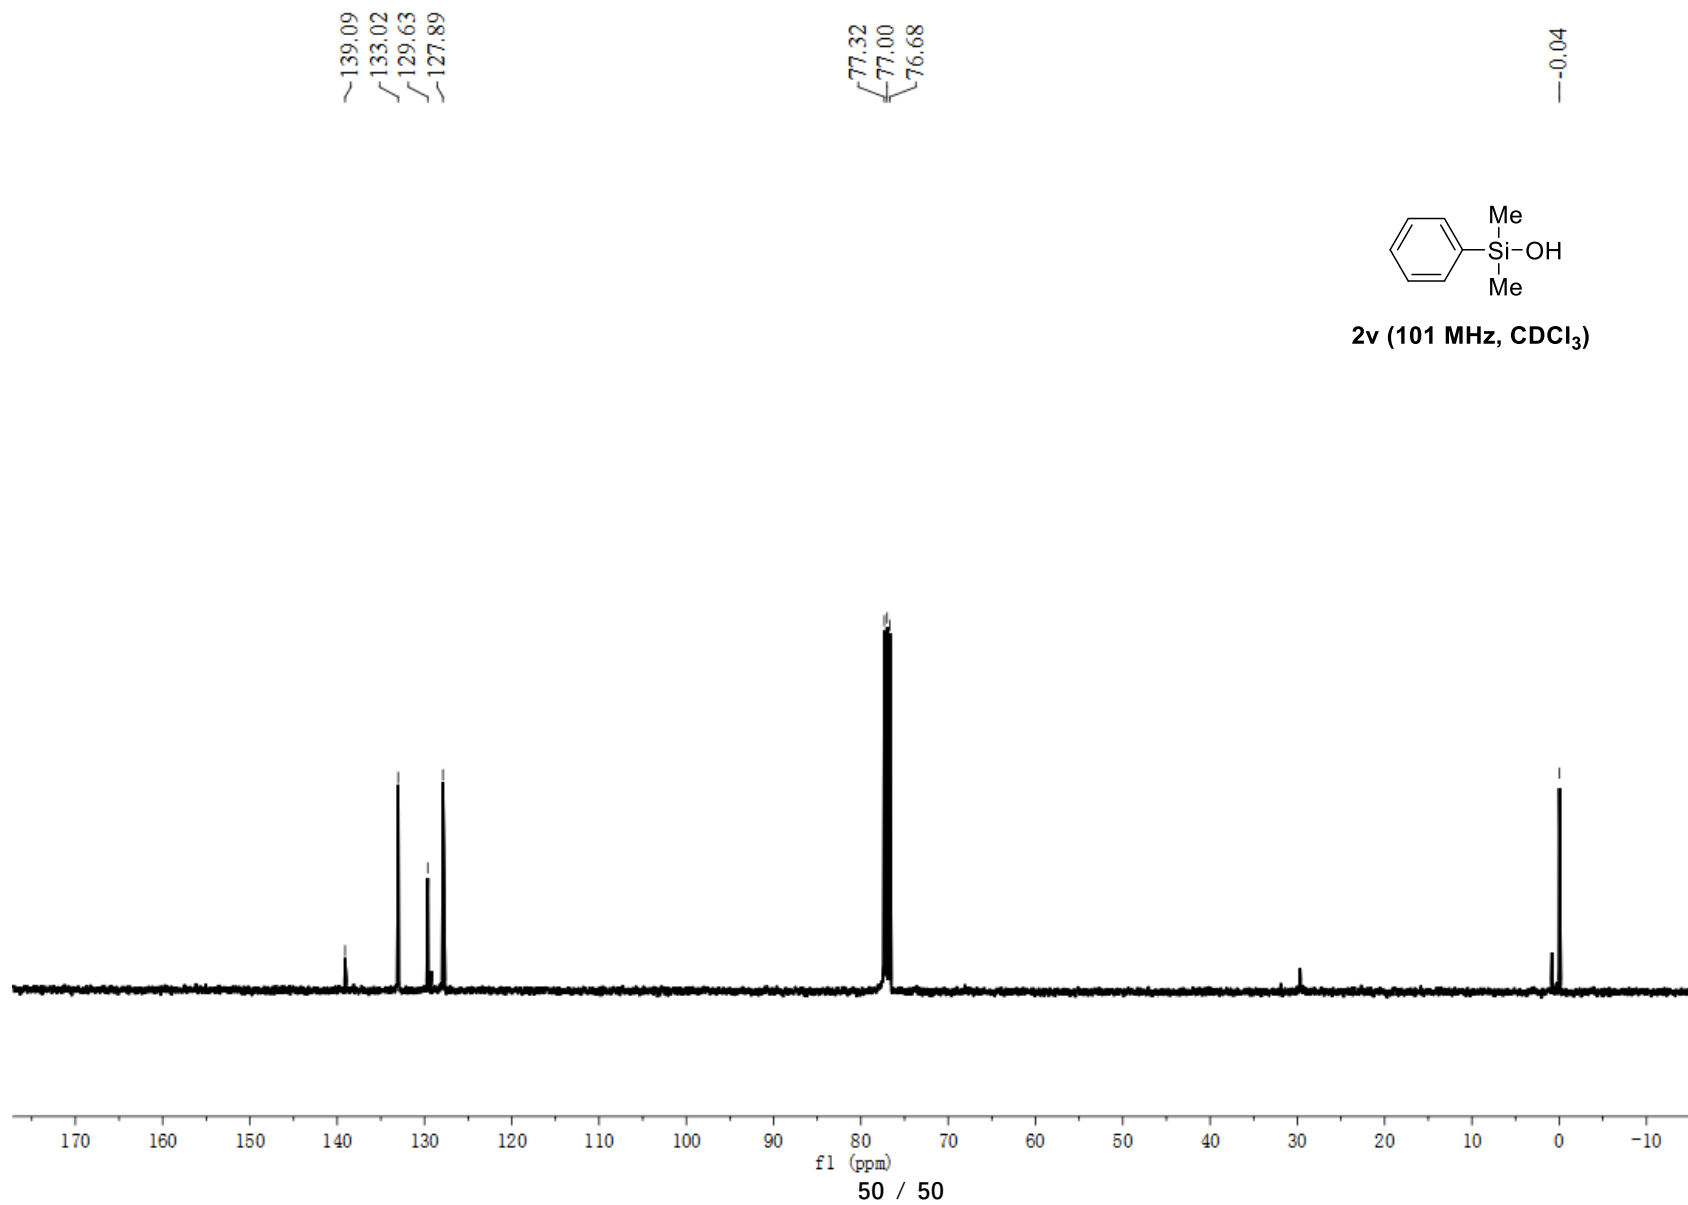

Supplement: s1 [file s1]
